# Supplementary material
Source: PubMed Central journal article supplement (PMC3084131)
Supplement: 1016558108_Appendix.pdf [file 1016558108_Appendix.pdf]

*Stemona* Alkaloid-Inspired Chemical Libraries: Methodology  
Development, Screening, and the Discovery of a Potent  
Class of Sigma Ligands

Kevin J. Frankowski, Vincent Setola<sup>†</sup>, Jon M. Evans<sup>†</sup>, Ben Neuenswander, Bryan L. Roth<sup>†</sup> and  
Jeffrey Aubé\*

Department of Medicinal Chemistry, University of Kansas, Delbert M. Shankel Structural  
Biology Center, 2121 Simons Drive, Lawrence, Kansas 66047

<sup>†</sup> Department of Pharmacology School of Medicine and NIMH Psychoactive Drug Screening  
Program CB 7365, University of North Carolina Chapel Hill, 4072 Genetic Medicine Building,  
Chapel Hill, NC 27514

\*jaube@ku.edu

Contents:

|                                                                                                         |      |
|---------------------------------------------------------------------------------------------------------|------|
| Structures of the analogues profiled in Figure 3 of the manuscript .....                                | S-3  |
| Heatmap table (secondary binding data) for compounds <b>10{7}</b> , <b>10{20}</b> , <b>10{22}</b> ..... | S-5  |
| Full table of chemotype <b>14</b> analogues synthesized and known secondary binding data .....          | S-5  |
| Heatmap table (secondary binding data) for compounds <b>14{41}</b> - <b>14{44}</b> .....                | S-8  |
| General experimental details .....                                                                      | S-8  |
| Synthesis and derivatization of tricyclic amine <b>9</b> .....                                          | S-10 |
| Isocyanide multicomponent reaction derivatization of ketoamide tricycles <b>8</b> .....                 | S-33 |
| <sup>1</sup> H and <sup>13</sup> C NMR spectra for amine derivatives <b>10</b> and <b>11</b> .....      | S-75 |

|                                                                                          |       |
|------------------------------------------------------------------------------------------|-------|
| $^1\text{H}$ and $^{13}\text{C}$ NMR spectra for spirocyclic derivatives <b>14</b> ..... | S-92  |
| References .....                                                                         | S-103 |

## Structures of the Initial 104 *Stemona* alkaloid analogues screened<sup>a, b</sup>

<sup>a</sup> Binding data can be found in Figure 3 of the manuscript (heatmap format) and in the supporting information data set (numerical  $K_i$  values with structures)

<sup>b</sup> To correlate the structures in this figure to the entries in the binding data tables above, read the structures left to right in rows

### Reductive Amination Library Compounds:

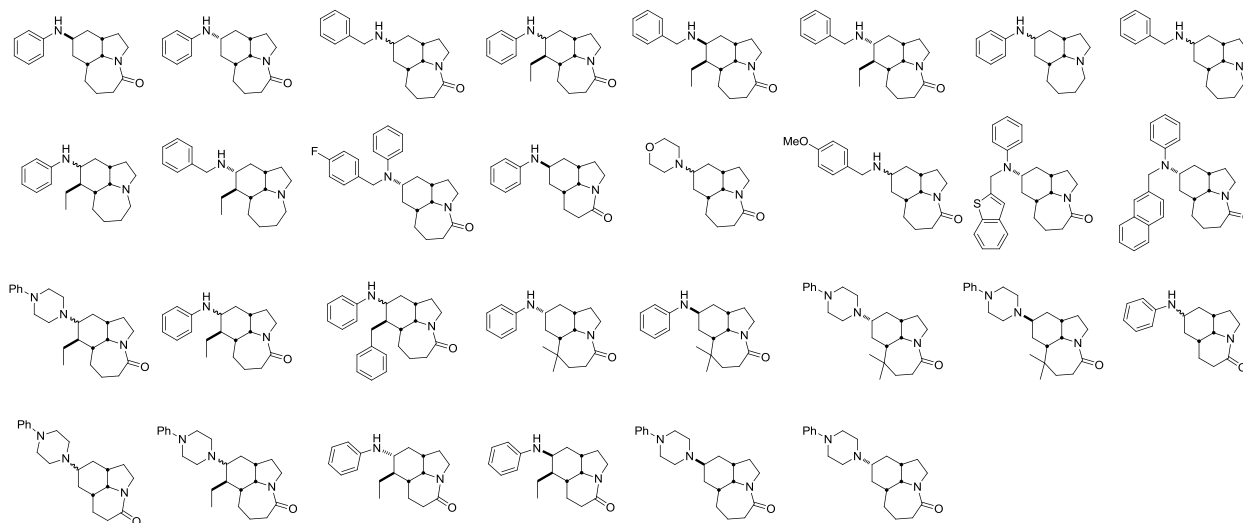

### Indole Library Compounds:

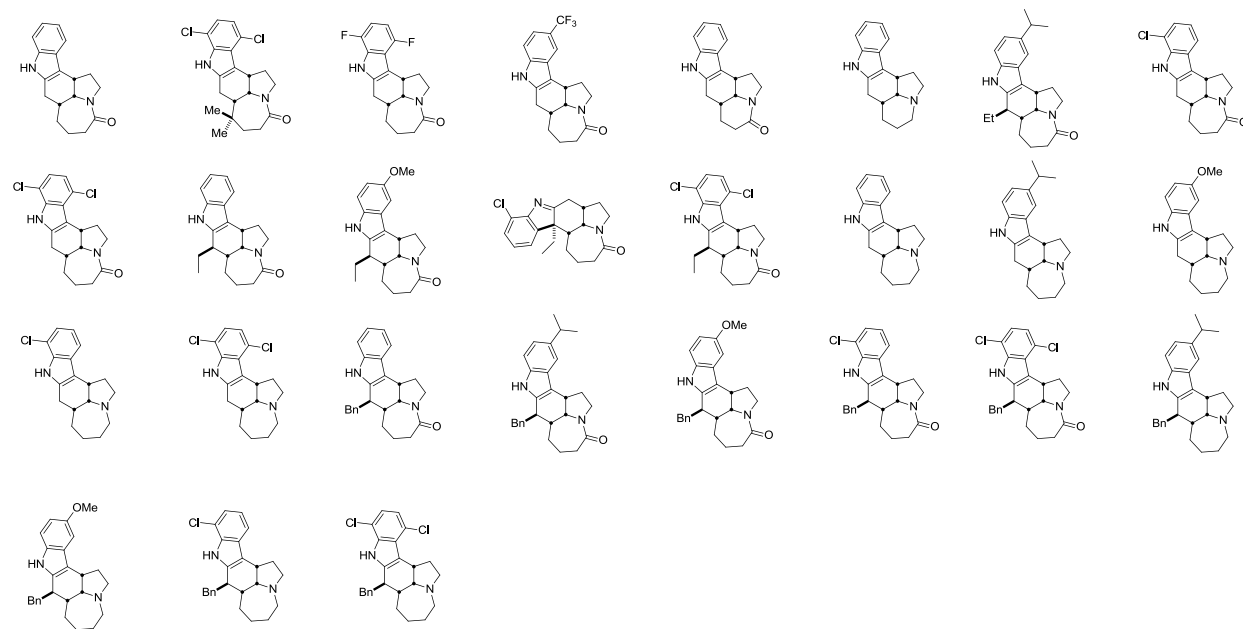

Quinoline Library Compounds:

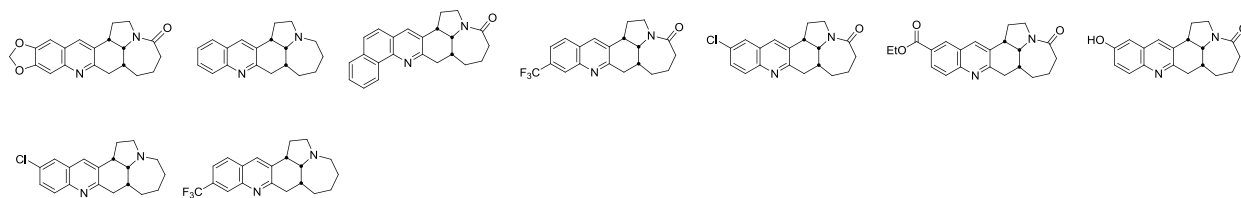

Core Scaffold Analogue Compounds:

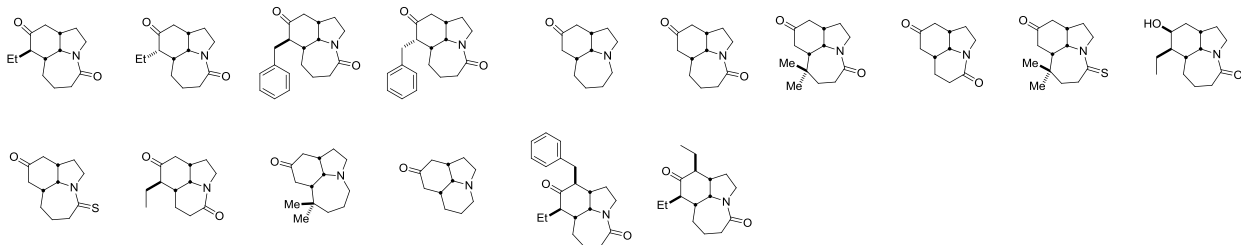

Carbamate Library Compounds:

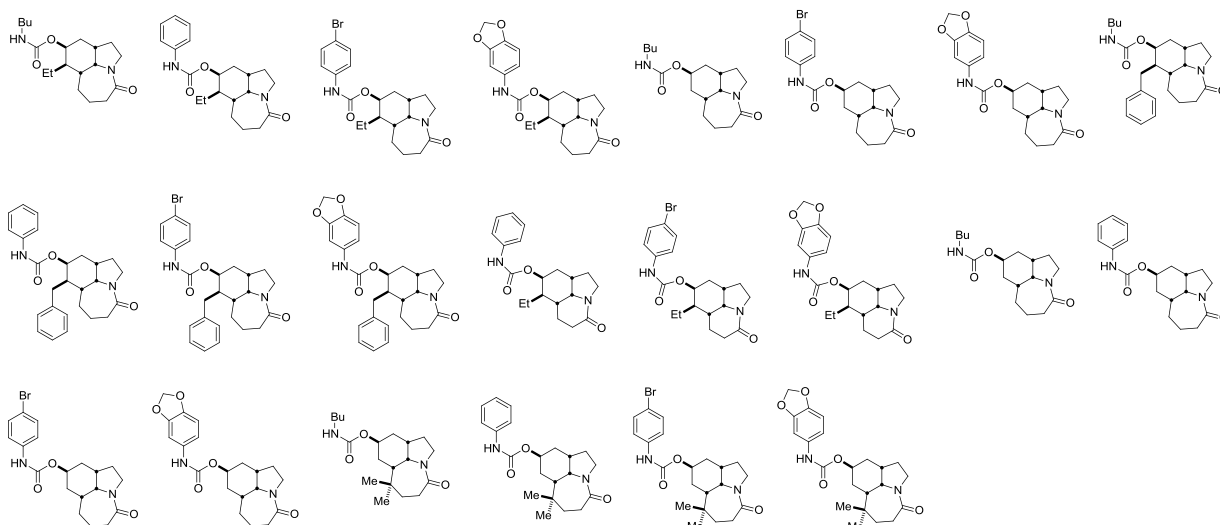

Profile screening (secondary binding data) for compounds 10{7}, 10{20}, 10{22}

| CMPD   | 5-HT1A                              | 5-HT1B   | 5-HT1D   | 5-HT1E   | 5-HT2A          | 5-HT2B | 5-HT2C | 5-HT3 | 5-HT5A                     | 5-HT6 | 5-HT7   | Alpha1A  | Alpha1B  |
|--------|-------------------------------------|----------|----------|----------|-----------------|--------|--------|-------|----------------------------|-------|---------|----------|----------|
| 10{7}  |                                     |          |          |          |                 |        |        |       |                            |       |         |          |          |
| 10{20} | 1,503.00                            |          |          |          |                 |        |        |       |                            |       |         |          |          |
| 10{22} | 4,500.00                            |          |          |          |                 |        |        |       |                            |       |         |          |          |
| CMPD   | Alpha1D                             | Alpha2A  | Alpha2B  | Alpha2C  | Beta1           | Beta2  | Beta3  | D2    | D4                         | DAT   | DOR     | H1       | H2       |
| 10{7}  |                                     | 1,271.00 | 6,433.00 | 978.1    |                 |        |        |       | 1,103.00                   |       |         | 1,250.00 | 7,971.00 |
| 10{20} |                                     | 906.7    | 8,222.00 | 1,060.00 |                 |        |        |       | 1,274.00                   |       |         | 1,574.00 |          |
| 10{22} |                                     |          |          |          |                 |        |        |       |                            |       |         |          |          |
| CMPD   | H3                                  | KOR      | M1       | M2       | M3              | M4     | M5     | MOR   | NET                        | SERT  | Sigma 1 | Sigma 2  |          |
| 10{7}  |                                     |          |          |          | 2,686.00        |        |        | 516.9 |                            | 1,941 | 5.8     | 124      |          |
| 10{20} |                                     | 1,115.00 |          |          | 6,492.00        |        |        | 736.6 |                            |       | 2       | 174.9    |          |
| 10{22} |                                     |          |          |          |                 |        |        |       |                            |       | 12      | 289.1    |          |
| Key:   | Ki > 10 μM or primary screen missed |          |          |          | Ki = 5 to 10 μM |        |        |       | Ki = 1 to 5 μM             |       |         |          |          |
|        | Ki = 0.5 to 1 μM                    |          |          |          | Ki < 0.5 μM     |        |        |       | no data or incomplete data |       |         |          |          |

Synthesis and known secondary binding data for analogues 14

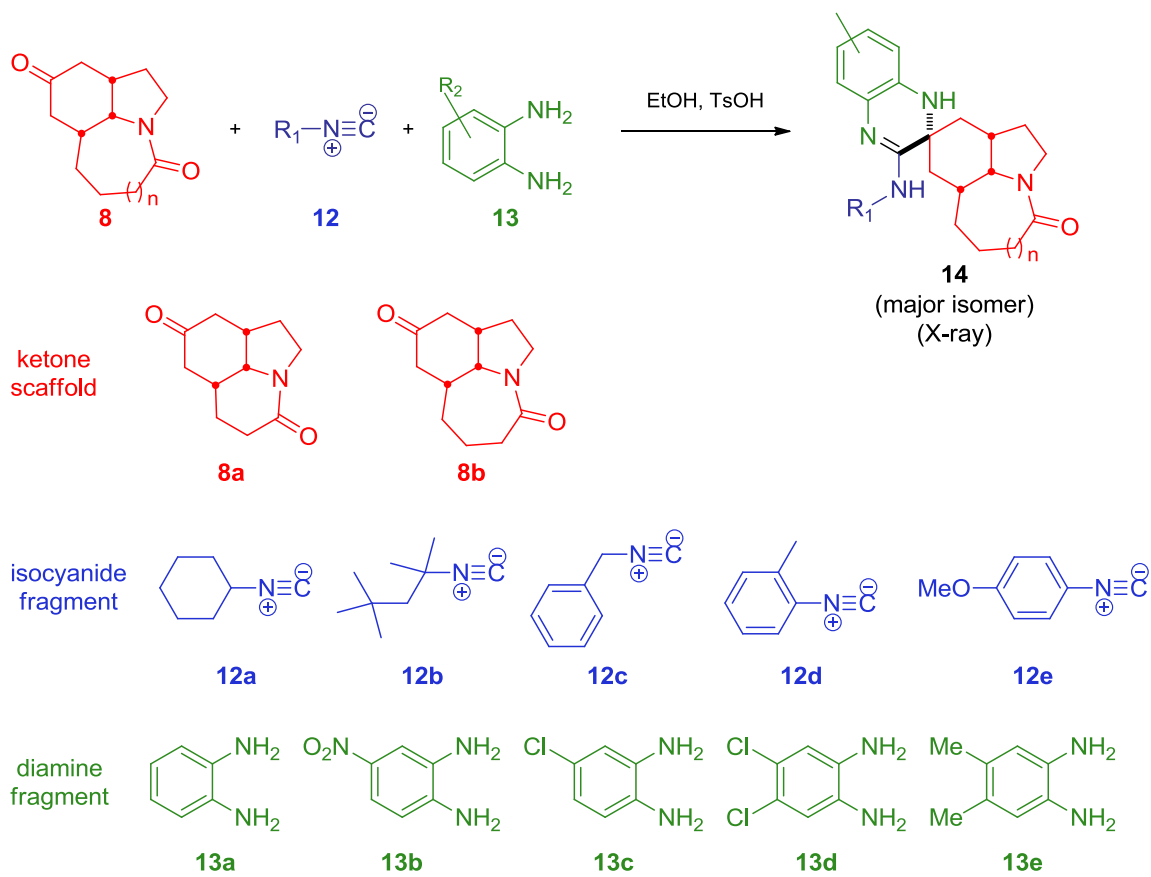

| entry | ketone scaffold | isocyanide fragment | diamine fragment | yield <sup>a</sup> (%) | other known binding Ki (nM) | Sigma 1 Ki (nM) | Sigma 2 Ki (nM) |
|-------|-----------------|---------------------|------------------|------------------------|-----------------------------|-----------------|-----------------|
| 1     | <b>8a</b>       | <b>12a</b>          | <b>13a</b>       | 29                     |                             | 3,037           | > 10,000        |
| 2     | <b>8a</b>       | <b>12a</b>          | <b>13b</b>       | 27                     |                             | > 10,000        | > 10,000        |
| 3     | <b>8a</b>       | <b>12a</b>          | <b>13c</b>       | 30                     | KOR 2,948                   | > 10,000        | > 10,000        |
| 4     | <b>8a</b>       | <b>12a</b>          | <b>13d</b>       | 7                      |                             | > 10,000        | no data         |
| 5     | <b>8a</b>       | <b>12a</b>          | <b>13e</b>       | 23                     |                             | > 10,000        | no data         |
| 6     | <b>8a</b>       | <b>12b</b>          | <b>13a</b>       | 43                     |                             | > 10,000        | > 10,000        |
| 7     | <b>8a</b>       | <b>12b</b>          | <b>13b</b>       | 16                     |                             | 3,885           | > 10,000        |
| 8     | <b>8a</b>       | <b>12b</b>          | <b>13c</b>       | 57                     |                             | > 10,000        | > 10,000        |
| 9     | <b>8a</b>       | <b>12b</b>          | <b>13d</b>       | 30                     |                             | > 10,000        | 760             |
| 10    | <b>8a</b>       | <b>12b</b>          | <b>13e</b>       | 41                     | KOR 607                     | 1,325           | 476             |
| 11    | <b>8a</b>       | <b>12c</b>          | <b>13a</b>       | 33                     |                             | 867             | 280             |
| 12    | <b>8a</b>       | <b>12c</b>          | <b>13b</b>       | 51                     |                             | 5,907           | 2,152           |
| 13    | <b>8a</b>       | <b>12c</b>          | <b>13c</b>       | 40                     |                             | 1,117           | > 10,000        |
| 14    | <b>8a</b>       | <b>12c</b>          | <b>13d</b>       | 32                     | KOR 802                     | 623             | > 10,000        |
| 15    | <b>8a</b>       | <b>12c</b>          | <b>13e</b>       | 54                     | KOR 407                     | 1,158           | > 10,000        |
| 16    | <b>8a</b>       | <b>12d</b>          | <b>13a</b>       | 29                     |                             | 949             | > 10,000        |
| 17    | <b>8a</b>       | <b>12d</b>          | <b>13b</b>       | 8                      |                             | > 10,000        | no data         |
| 18    | <b>8a</b>       | <b>12d</b>          | <b>13c</b>       | 6                      |                             | > 10,000        | no data         |
| 19    | <b>8a</b>       | <b>12d</b>          | <b>13d</b>       | 7                      |                             | > 10,000        | no data         |
| 20    | <b>8a</b>       | <b>12d</b>          | <b>13e</b>       | 35                     |                             | > 10,000        | > 10,000        |
| 21    | <b>8b</b>       | <b>12a</b>          | <b>13a</b>       | 17                     |                             | > 10,000        | 3,868           |

|    |           |            |            |    |                                |          |          |
|----|-----------|------------|------------|----|--------------------------------|----------|----------|
| 22 | <b>8b</b> | <b>12a</b> | <b>13b</b> | 45 |                                | 6,613    | > 10,000 |
| 23 | <b>8b</b> | <b>12a</b> | <b>13c</b> | 50 |                                | > 10,000 | 7,569    |
| 24 | <b>8b</b> | <b>12a</b> | <b>13d</b> | 15 | KOR 3,614                      | > 10,000 | 3,160    |
| 25 | <b>8b</b> | <b>12a</b> | <b>13e</b> | 40 |                                | 9,143    | > 10,000 |
| 26 | <b>8b</b> | <b>12b</b> | <b>13a</b> | 42 | 5HT <sub>1A</sub> 431          | 4,415    | 6,798    |
| 27 | <b>8b</b> | <b>12b</b> | <b>13b</b> | 44 | KOR 5,877                      | 2,538    | 7,349    |
| 28 | <b>8b</b> | <b>12b</b> | <b>13c</b> | 60 |                                | > 10,000 | 4,137    |
| 29 | <b>8b</b> | <b>12b</b> | <b>13d</b> | 46 |                                | > 10,000 | 2,245    |
| 30 | <b>8b</b> | <b>12b</b> | <b>13e</b> | 61 |                                | > 10,000 | > 10,000 |
| 31 | <b>8a</b> | <b>12c</b> | <b>13a</b> | 40 | KOR 5,641                      | > 10,000 | > 10,000 |
| 32 | <b>8b</b> | <b>12c</b> | <b>13b</b> | 27 |                                | > 10,000 | > 10,000 |
| 33 | <b>8b</b> | <b>12c</b> | <b>13c</b> | 55 | KOR 2,945                      | > 10,000 | > 10,000 |
| 34 | <b>8b</b> | <b>12c</b> | <b>13d</b> | 28 | KOR 7,412                      | 3,628    | 1,622    |
| 35 | <b>8b</b> | <b>12c</b> | <b>13e</b> | 53 |                                | 1,507    | 917      |
| 36 | <b>8b</b> | <b>12d</b> | <b>13a</b> | 24 |                                | 4,133    | 1,014    |
| 37 | <b>8b</b> | <b>12d</b> | <b>13b</b> | 6  |                                | > 10,000 | > 10,000 |
| 38 | <b>8b</b> | <b>12d</b> | <b>13c</b> | 24 |                                | 1,253    | 769      |
| 39 | <b>8b</b> | <b>12d</b> | <b>13d</b> | 14 |                                | 4,009    | 778      |
| 40 | <b>8b</b> | <b>12d</b> | <b>13e</b> | 35 |                                | 3,744    | 749      |
| 41 | <b>8b</b> | <b>12e</b> | <b>13b</b> | 69 | Alpha1A 1,156<br>Alpha1B 7,588 | > 10,000 | > 10,000 |
| 42 | <b>8b</b> | <b>12e</b> | <b>13c</b> | 73 | D2 9,360                       | > 10,000 | > 10,000 |
| 43 | <b>8b</b> | <b>12e</b> | <b>13d</b> | 23 | KOR 3,080                      | > 10,000 | 7,526    |

|    |           |            |            |    |                                     |          |          |
|----|-----------|------------|------------|----|-------------------------------------|----------|----------|
|    |           |            |            |    | Alpha1A 922<br>D2 3,530<br>D3 7,037 |          |          |
| 44 | <b>8b</b> | <b>12e</b> | <b>13e</b> | 71 | D2 8,170                            | > 10,000 | > 10,000 |

(a) Yield refers to isolated material of the major isomer, when chromatographic separation was possible

### Heatmap format of GPCR profile screening of compounds 14<sup>a</sup>

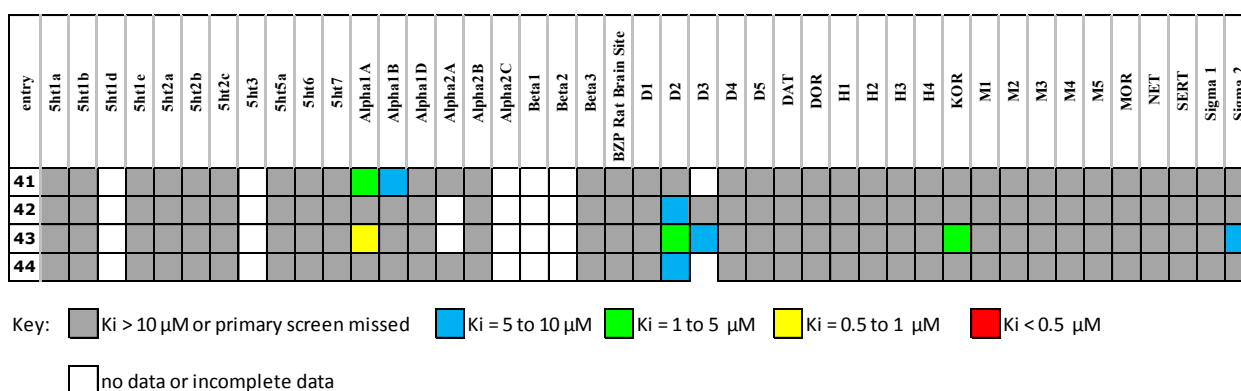

(a) Numerical data ( $K_i$  values) included in above table

## Experimental Details:

**General.** All chemicals were used as purchased from commercial suppliers unless otherwise stated. Methylene chloride, ethyl ether, toluene, acetonitrile and THF were dried by being passed through two packed columns of basic alumina under argon pressure prior to use. The azide-containing diene precursor to **7** and the ketoamide substrates **8a** and **8b** were synthesized as previously described.<sup>1</sup> The synthetic routes and representative characterization for the compounds in Table 2 of the manuscript have been previously described.<sup>1</sup>



Parallel syntheses were performed on the Bohdan Miniblock XT parallel solution phase synthesizer obtained from Mettler-Toledo Auto Chem. Automated weighing was performed using the Bohdan Balance Automator (Mettler-Toledo Auto Chem). Parallel evaporation was performed on the GeneVac EZ-2 plus evaporator system.  $^1\text{H}$  and  $^{13}\text{C}$  NMR spectra were recorded on a Bruker AM 400 spectrometer (operating at 400 and 100 MHz respectively) in  $\text{CDCl}_3$  with 0.03% TMS as an internal standard. Chemical shifts are reported in parts per million (ppm) downfield from TMS.  $^{13}\text{C}$  multiplicities were determined with the aid of an APT pulse sequence, differentiating the signals for methyl and methane carbons as “d” from methylene and quaternary carbons as “u”. The infrared (IR) spectra were acquired as thin on a PerkinElmer Spectrum 100 FT-IR spectrometer equipped with a universal ATR sampling accessory and the absorption frequencies are reported in  $\text{cm}^{-1}$ . Melting points were determined on an Electrothermal Mel-Temp model number 101D apparatus and are uncorrected.

HPLC analysis was carried out using an XBridge MS C-18 column (5  $\mu\text{M}$ , 4.6  $\times$  150 mm) with gradient elution (5%  $\text{CH}_3\text{CN}$  to 100%  $\text{CH}_3\text{CN}$ ) on a Waters Alliance 2795 Separation Module with a Waters 2996 Photodiode Array UV detector and a Waters/Micromass LCT Premier (TOF) detector. Purification was carried out using an XBridge MS C-18 column (5  $\mu\text{M}$ , 19  $\times$  150 mm) with gradient elution (a narrow  $\text{CH}_3\text{CN}$  gradient was chosen based on the targets retention time from LCMS analysis of the crude sample) on a Mass Directed Fractionation instrument with a Waters 2767 sample manager, a Waters 2525 HPLC pump, a Waters 2487 dual  $\lambda$  absorbance detector, and a Waters/Micromass ZQ (quadrupole) detector. Fractions were triggered using an MS and/or UV threshold determined by an LCMS analysis of the crude sample. One of three aqueous mobile phases were chosen for both analysis and purification to promote the

targets neutral state (water, 0.05% formic acid or pH 9.8 1mM HCO<sub>2</sub>NH<sub>4</sub>). High resolution mass spectra (HRMS) were obtained using a Waters/Micromass LCT Premier (TOF instrument).

Radio ligands for the radio ligand binding assays were purchased from Perkin-Elmer or GE Healthcare. Competition binding assays were performed using transfected or stably expressing cell membrane preparations as previously described.<sup>ii, iii, iv</sup> Detailed information such as radioligand identity, radioligand concentration, incubation buffer and incubation time for all assays are available online (<http://pdsp.med.unc.edu/UNC-CH%20Protocol%20Book.pdf>).

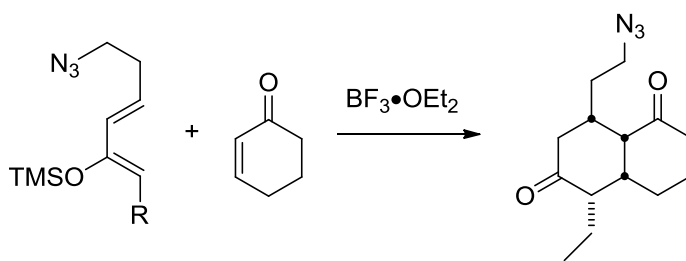

**10-Ethyl-octaahydroazepino[3,2,1-hi]indole-4,9(1H,51H)-dione 7.** To a solution of 2-cyclohexen-1-one (840 mg, 8.73 mmol) in CH<sub>2</sub>Cl<sub>2</sub> (150 mL) and flame-dried 4 Å molecular sieve pellets (14.00 g) at -78 °C was added BF<sub>3</sub>·OEt<sub>2</sub> (1.1 mL, 8.73 mmol, 1.0 equiv.). After stirring for 5 minutes at -78 °C, the azide-containing siloxydiene (3.13 g, 13.10 mmol, 1.5 equiv.) in CH<sub>2</sub>Cl<sub>2</sub> (10 mL) was added portionwise over 15 minutes. The reaction was stirred overnight, slowly warming to rt. The reaction was worked up with saturated aqueous NH<sub>4</sub>Cl and extracted with CH<sub>2</sub>Cl<sub>2</sub> (3 × 50 mL). The combined organic layers were dried over anhydrous Na<sub>2</sub>SO<sub>4</sub>, concentrated and chromatographed to afford the bicyclic diketoazide intermediate (1.80 g, 6.84 mmol, 78% yield). TLC R<sub>f</sub> = 0.43 (25% EtOAc in hexanes); <sup>1</sup>H NMR δ 0.83 (t, J = 7.6

Hz, 3 H), 1.40-1.52 (m, 2 H), 1.64 (m, 1 H), 1.85 (m, 2 H), 1.92-2.08 (complex, 3 H), 2.19-2.34 (complex, 3 H), 2.49 (m, 2 H), 2.68 (dd,  $J = 11.1, 14.4$  Hz, 1 H), 2.78 (m, 1 H), 2.92 (m, 1 H), 3.27 (m, 1 H), 3.36 (m, 1 H);  $^{13}\text{C}$  NMR  $\delta$  d 11.9, 35.8, 42.3, 49.7, 55.1; u 19.7, 23.7, 25.3, 31.2, 41.3, 41.6, 49.2, 212.0, 213.0; IR 3397 (w), 2962 (s), 2876 (s), 2094 (s), 1715 (s), 1257 (s)  $\text{cm}^{-1}$ ; HRMS calcd for  $\text{C}_{14}\text{H}_{22}\text{N}_3\text{O}_2$  [ $\text{M} + \text{H}^+$ ] 264.1712, found 264.1724.

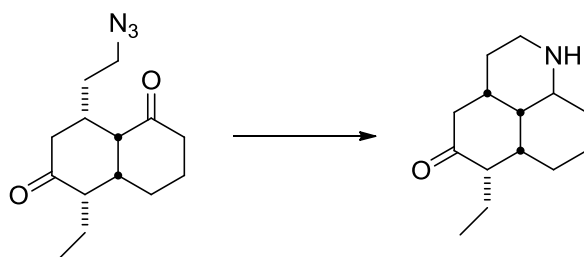

**6-Ethyldecahydro-1H-benzo[de]quinolin-5(3a1H)-one 9.** The diketoazide **7** (108 mg, 0.41 mmol) and polystyrene bound triphenyl phosphine (0.27 g resin, 0.82 mmol) in THF (8 mL) were stirred at rt for 14 h. The reaction was filtered through celite and concentrated. The residue was taken up in  $\text{CH}_2\text{Cl}_2$  (5 mL) and  $\text{NaBH}(\text{OAc})_3$  (174 mg, 0.82 mmol) was added as a solid. The reaction was stirred 4 h at rt and partitioned between NaOH (1 N, 15 mL) and  $\text{CH}_2\text{Cl}_2$  ( $3 \times 10$  mL). The combined organic layers were dried ( $\text{Na}_2\text{SO}_4$ ) and concentrated. The crude product was purified by filtration through a short alumina column, eluting with 1:1 acetone:  $\text{CH}_2\text{Cl}_2$  to give the tricyclic amine **9** (65 mg, 0.29 mmol, 72% yield) as a yellow oil.  $R_f = 0.04$  (1:1 acetone: $\text{CH}_2\text{Cl}_2$ );  $^1\text{H}$  NMR  $\delta$  0.81 (t,  $J = 7.3$  Hz, 3 H), 1.21 (m, 2 H), 1.36-1.75 (complex, 11 H), 1.82 (m, 1 H), 2.14-2.32 (m, 3 H), 2.75 (dt,  $J = 2.8, 11.9$  Hz, 1 H), 3.11 (ddd,  $J = 2.5, 4.3, 12.1$  Hz, 1 H);  $^{13}\text{C}$  NMR  $\delta$  d 11.8, 42.3, 43.7, 46.1, 57.3, 61.0; u 19.6, 24.5, 29.2, 33.2, 34.3, 44.6,

46.5, 214.0; IR (neat) 2927, 2858, 1709  $\text{cm}^{-1}$ ; HRMS calcd for  $\text{C}_{14}\text{H}_{24}\text{NO}$   $[\text{M} + \text{H}]$  222.1858, obsd 222.1851.

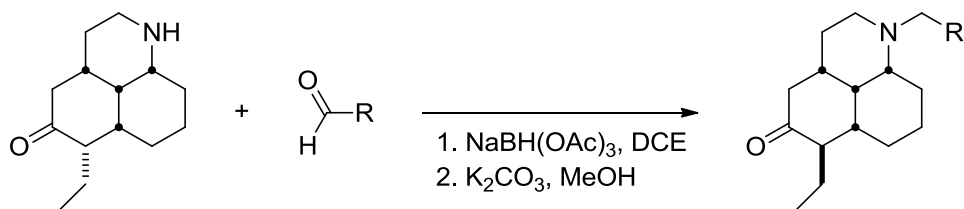

**General procedure for the reductive amination of tricyclic **9**:** The aldehyde component (0.50 mmol, 2.5 equiv) was charged as a neat oil or powder into individual reaction tubes of a Bohdan Miniblock XT parallel solution phase synthesizer. To each reaction tube was added a solution of the tricyclic amine **9** (45 mg, 0.20 mmol) in dichloroethane (3 mL) and solid sodium triacetoxyborohydride (170 mg, 0.80 mmol, 4 equiv). The reaction was stirred at rt for 14 h, diluted with aqueous sodium hydroxide (1 N, 6 mL), transferred to hydrophobic phase separator tubes and extracted with  $\text{CH}_2\text{Cl}_2$  ( $2 \times 3$  mL). The combined organics were collected in a clean set of  $17 \times 110$  mm reaction tubes and evaporated under vacuum in parallel to afford the crude tertiary amine products.

To each of the above crude tertiary amine products was added a magnetic stir bar, MeOH (4 mL) and  $\text{K}_2\text{CO}_3$  (125 mg, 0.90 mmol, 4.5 equiv). The reactions were stirred for 16 h, filtered through fritted reaction tubes and evaporated under vacuum in parallel. The reaction residues were directly purified by mass-directed preparative HPLC purification to afford the pure epimerized tertiary amine products **10**.

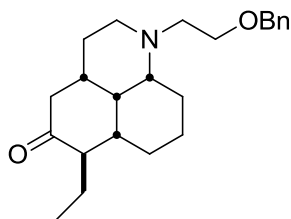

**1-(2-(benzyloxy)ethyl)-6-ethyldecahydro-1H-benzo[de]quinolin-5(3a1H)-one 10{I}**. The general procedure afforded **10{I}** (30.8 mg, 0.087 mmol, 44% yield) as a viscous light brown oil.  $^1\text{H}$  NMR (400 MHz,  $\text{CDCl}_3$ )  $\delta$  0.84 (t,  $J = 8.0$  Hz, 3 H), 1.02 (dq,  $J = 4.0, 12.0$  Hz, 1 H), 1.12-1.35 (complex, 4 H), 1.40-1.69 (complex, 5 H), 1.84-2.04 (complex, 4 H), 2.14 (m, 2 H), 2.33 (dd,  $J = 4.0, 12.0$  Hz, 1 H), 2.45 (m, 1 H), 2.76 (m, 1 H), 3.03 (m, 2 H), 3.59 (t,  $J = 8.0$  Hz, 2 H), 4.51 (s, 2 H), 7.24-7.38 (complex, 5 H);  $^{13}\text{C}$  NMR (100 MHz,  $\text{CDCl}_3$ )  $\delta$  u: 17.9, 24.5, 30.0, 31.3, 33.1, 48.8, 52.1, 53.5, 67.3, 73.2, 138.3, 210.7; d 11.2, 41.4, 44.7, 50.7, 56.1, 64.5, 127.5, 127.6 ( $\times 2$ ), 128.3 ( $\times 2$ ); IR (neat) 2928, 2859, 1709  $\text{cm}^{-1}$ ; HRMS (ESI)  $m/z$  calcd for  $\text{C}_{23}\text{H}_{34}\text{NO}_2$  ( $[\text{M}+\text{H}]^+$ ), 356.2590, found 356.2570.

ID CMC-34-066-D File KF070808L01b Date 08-Jul-2008 Time 08:42:30 Description MDF008449

3: UV Detector: 214

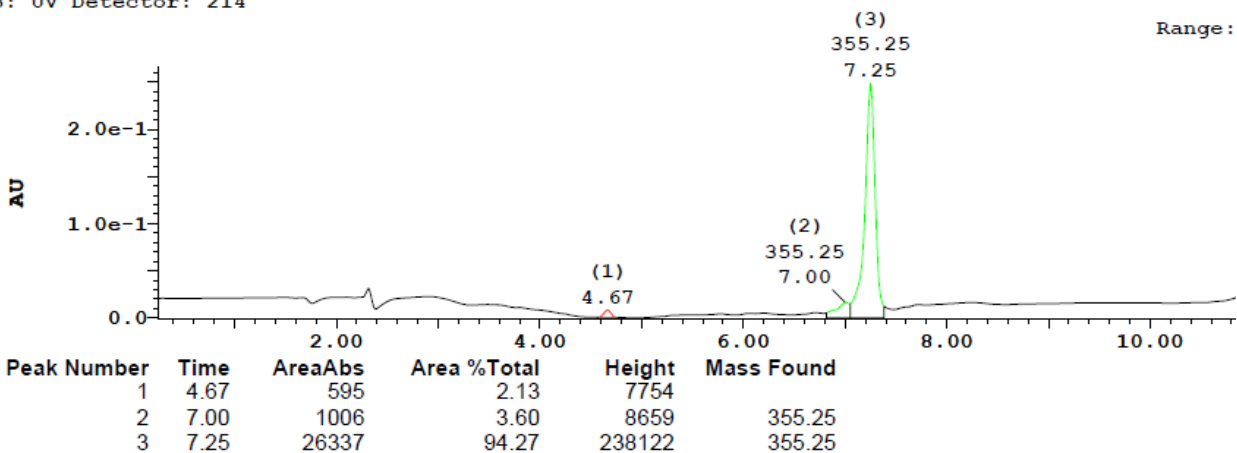

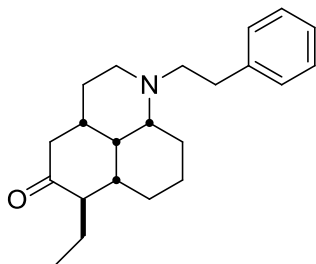

**6-ethyl-1-phenethyldecahydro-1H-benzo[de]quinolin-5(3a1H)-one 10{2}**. The general procedure afforded **10{2}** (20.9 mg, 0.064 mmol, 32% yield) as a viscous orange oil.  $^1\text{H}$  NMR (400 MHz,  $\text{CDCl}_3$ )  $\delta$  0.85 (t,  $J = 8.0$  Hz, 3 H), 1.07 (dt,  $J = 4.0, 12.0$  Hz, 1 H), 1.19-1.38 (complex, 3 H), 1.44-1.72 (complex, 5 H), 1.87-2.25 (complex, 5 H), 2.36 (dd,  $J = 4.0, 12.0$  Hz, 1 H), 2.51 (m, 1 H), 2.74 (m, 2 H), 2.91 (m, 2 H), 3.06 (td,  $J = 4.0, 12.0$  Hz, 1 H), 7.16-7.22 (complex, 3 H), 7.29 (m, 2 H);  $^{13}\text{C}$  NMR (100 MHz,  $\text{CDCl}_3$ )  $\delta$  u: 18.0, 24.7, 29.9, 30.7, 31.4, 33.3, 48.9, 52.6, 55.1, 140.5, 210.7; d: 11.2, 41.5, 44.7, 50.9, 56.2, 63.6, 126.0, 128.5 ( $\times 2$ ), 128.7 ( $\times 2$ ); IR (neat) 3398, 2932, 2859, 1710  $\text{cm}^{-1}$ ; HRMS (ESI)  $m/z$  calcd for  $\text{C}_{22}\text{H}_{32}\text{NO}$  ( $[\text{M}+\text{H}]^+$ ), 326.2484, found 326.2464.

ID CMC-34-066-E File KF070808L02b Date 08-Jul-2008 Time 08:54:52 Description MDF008453

3: UV Detector: 214

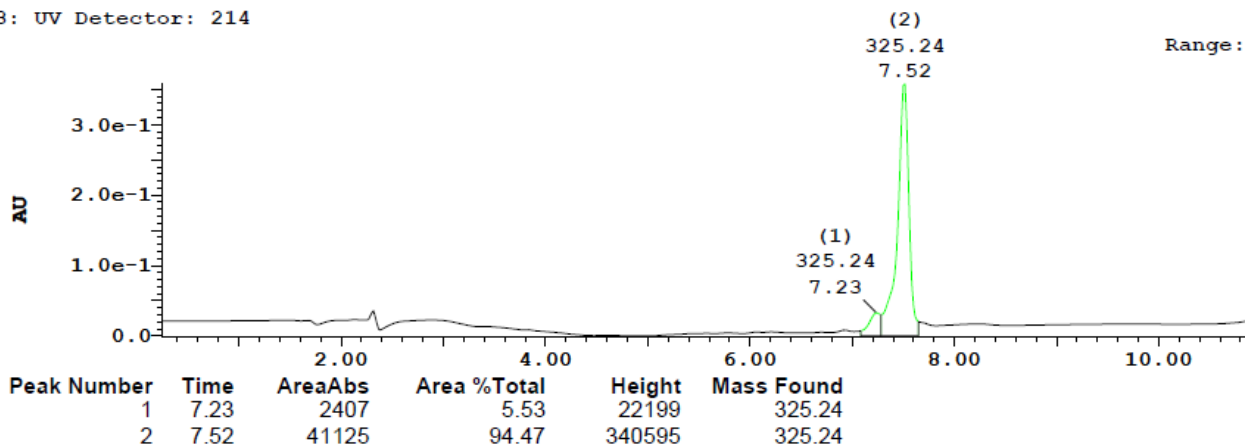

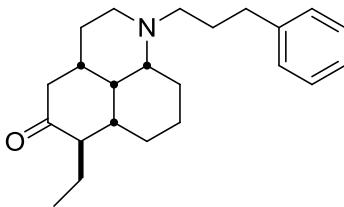

**6-ethyl-1-(3-phenylpropyl)decahydro-1H-benzo[de]quinolin-5(3a1H)-one 10{3}**. The general procedure afforded **10{3}** (37.6 mg, 0.111 mmol, 55% yield) as a viscous orange oil. HRMS (ESI)  $m/z$  calcd for  $C_{23}H_{34}NO$  ( $[M+H]^+$ ), 340.2640, found 340.2464.

ID CMC-34-066-F File KF070808L03b Date 08-Jul-2008 Time 09:07:13 Description MDF008629

3: UV Detector: 214

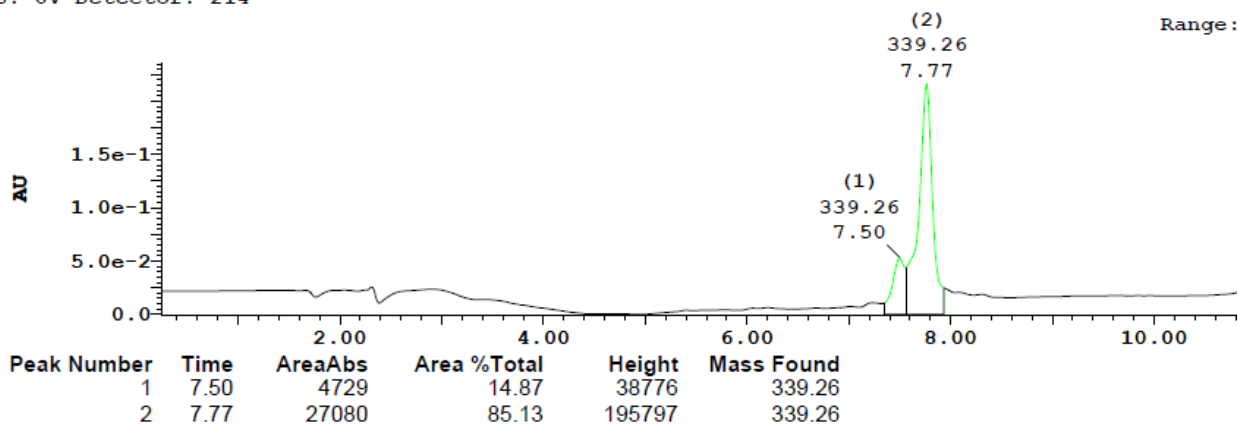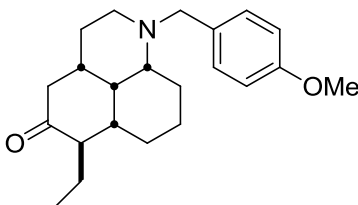

**6-Ethyl-1-(4-methoxybenzyl)decahydro-1H-benzo[de]quinolin-5(3a1H)-one 10{4}**. The general procedure afforded **10{4}** (18.2 mg, 0.053 mmol, 27% yield) as a light yellow oil. HRMS (ESI)  $m/z$  calcd for  $C_{22}H_{32}NO_2$  ( $[M+H]^+$ ), 342.2433, found 342.2419.

3: UV Detector: 214

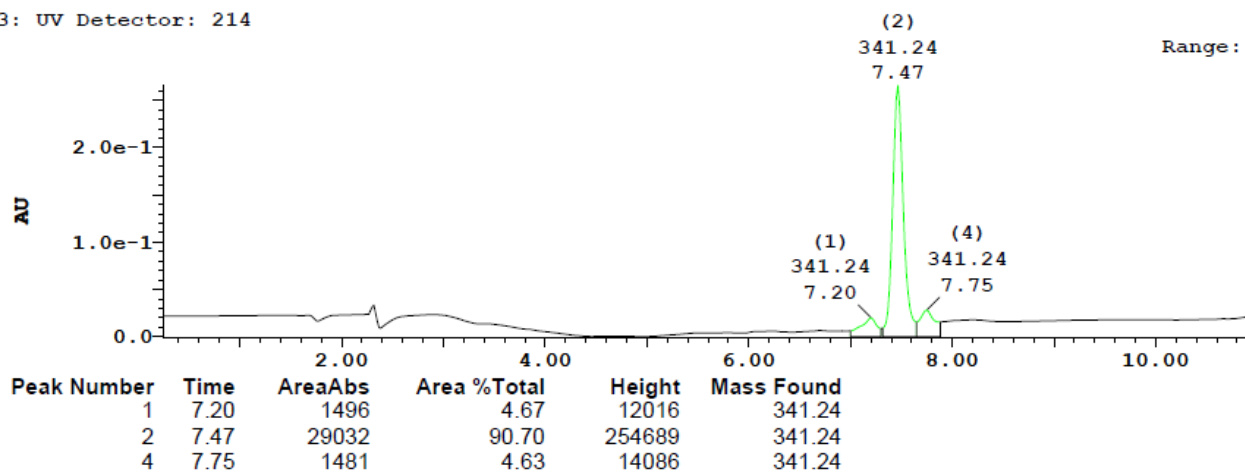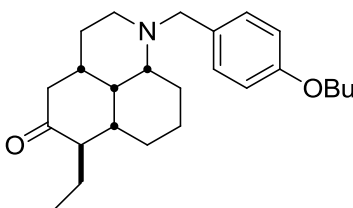

**1-(4-butoxybenzyl)-6-ethyldecahydro-1H-benzo[de]quinolin-5(3a1H)-one **10{5}****. The general procedure afforded **10{5}** (33.9 mg, 0.088 mmol, 44% yield) as a viscous colorless oil.  $^1\text{H}$  NMR (400 MHz,  $\text{CDCl}_3$ )  $\delta$  0.85 (t,  $J = 8.0$  Hz, 3 H), 0.97 (t,  $J = 8.0$  Hz, 3 H), 1.05-1.58 (complex, 11 H), 1.62-1.80 (complex, 4 H), 1.86-2.15 (complex, 5 H), 2.29 (d,  $J = 3.6$  Hz, 1 H), 2.35 (m, 1 H), 2.84 (td,  $J = 3.6, 11.6$  Hz, 1 H), 3.20 (d,  $J = 13.6$  Hz, 1 H), 3.95 (t,  $J = 5.2$  Hz, 2 H), 4.04 (d,  $J = 13.2$  Hz, 1 H), 6.84 (d,  $J = 8.4$  Hz, 2 H), 7.18 (d,  $J = 8.8$  Hz, 2 H);  $^{13}\text{C}$  NMR (100 MHz,  $\text{CDCl}_3$ )  $\delta$  u: 17.9, 19.3, 24.6, 30.4, 31.4, 31.5, 33.1, 48.8, 52.5, 56.6, 67.6, 130.6, 158.1, 211.0; d: 11.2, 13.9, 41.6, 44.7, 50.9, 56.2, 65.0, 114.1 ( $\times 2$ ), 130.2 ( $\times 2$ ); IR (neat) 2930, 2862, 2789, 1710  $\text{cm}^{-1}$ ; HRMS (ESI)  $m/z$  calcd for  $\text{C}_{25}\text{H}_{38}\text{NO}_2$  ( $[\text{M}+\text{H}]^+$ ), 384.2903, found 384.2908.



3: UV Detector: 214

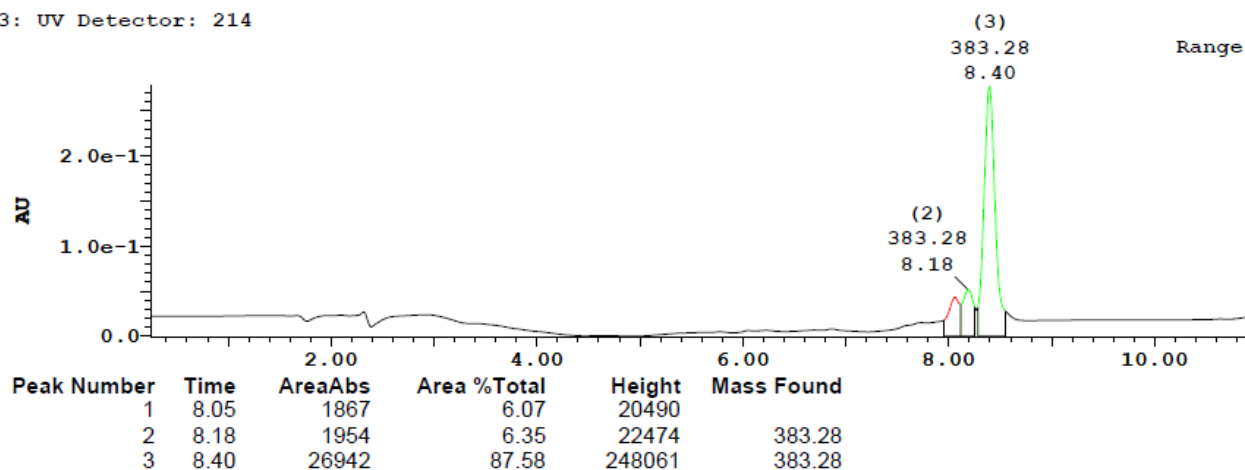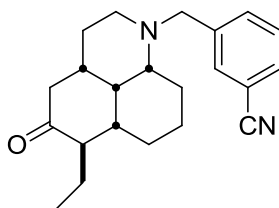

**6-Ethyl-5-oxododecahydro-1H-benzo[de]quinolin-1-yl)methyl)benzonitrile 10{6}**. The general procedure afforded **10{6}** (28.1 mg, 0.084 mmol, 42% yield) as an orange oil. HRMS (ESI)  $m/z$  calcd for  $C_{22}H_{29}N_2O$  ( $[M+H]^+$ ), 337.2280, found 337.2256.

3: UV Detector: 214

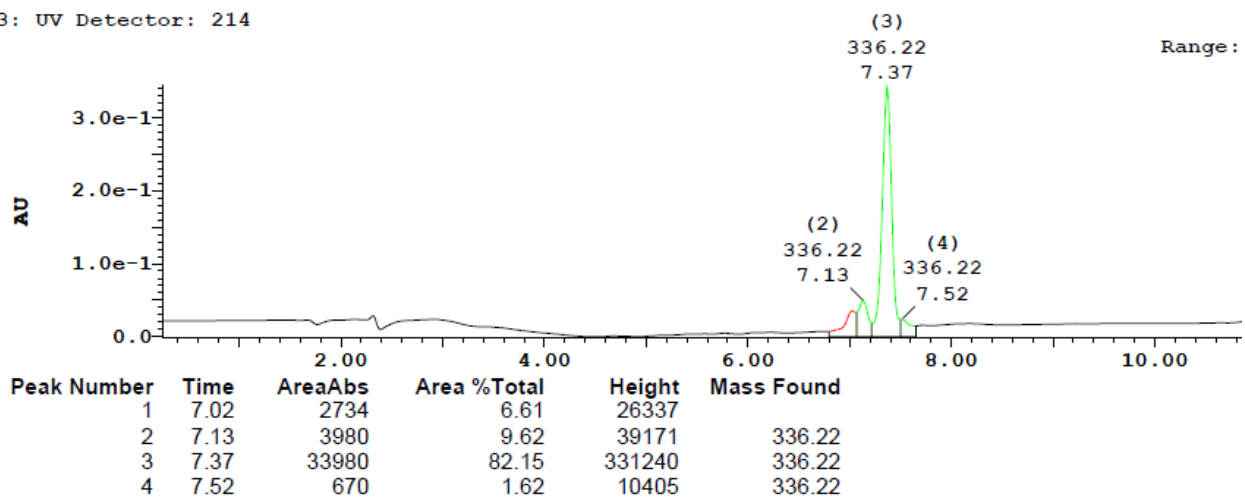

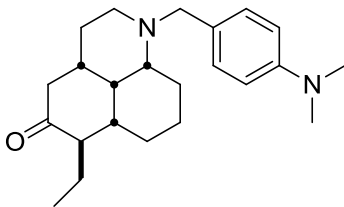

**1-(4-(dimethylamino)benzyl)-6-ethyldecahydro-1H-benzo[de]quinolin-5(3a1H)-one 10{7}.**

The general procedure afforded **10{7}** (18.4 mg, 0.052 mmol, 26% yield) as an orange oil.

HRMS (ESI)  $m/z$  calcd for  $C_{23}H_{35}N_2O$  ( $[M+H]^+$ ), 355.2749, found 355.2733.

ID CMC-34-066-M File KF070808L09 Date 08-Jul-2008 Time 10:21:23 Description MDF008617

3: UV Detector: 214

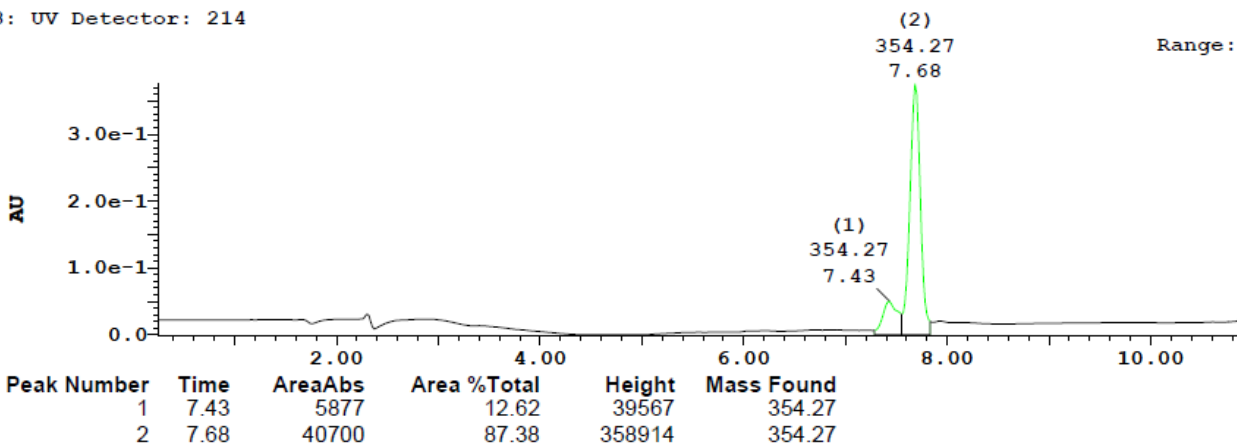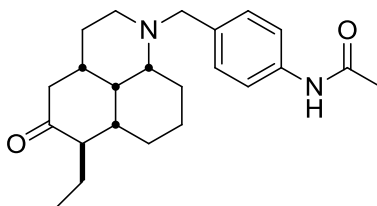

**6-Ethyl-5-oxododecahydro-1H-benzo[de]quinolin-1-yl)methyl)phenyl)acetamide 10{8}.** The

general procedure afforded **10{8}** (17.5 mg, 0.049 mmol, 25% yield) as a viscous brown oil.  $^1H$

NMR (400 MHz,  $CDCl_3$ )  $\delta$  0.85 (t,  $J = 7.2$  Hz, 3 H), 1.07 (dt,  $J = 3.2, 11.2$  Hz, 1 H), 1.19-1.47

(complex, 5 H), 1.55 (m, 2 H), 1.67 (m, 1 H), 1.89-2.22 (complex, 6 H), 2.17 (s, 3 H), 2.31 (dd,  $J$

= 3.6, 13.2 Hz, 2 H), 2.45 (m, 1 H), 2.84 (td,  $J = 3.2, 10.4$  Hz, 1 H), 3.22 (d,  $J = 13.6$  Hz, 1 H),

4.07 (d,  $J = 13.6$  Hz, 1 H), 7.24 (d,  $J = 8.4$  Hz, 2 H), 7.44 (d,  $J = 8.4$  Hz, 2 H);  $^{13}\text{C}$  NMR (100 MHz,  $\text{CDCl}_3$ )  $\delta$  u: 17.9, 24.6, 30.4, 31.4, 31.4, 33.0, 48.8, 52.7, 56.7, 136.6, 168.2, 210.8; d: 11.2, 41.5, 44.7, 47.5, 50.8, 56.2, 65.2, 119.7 ( $\times 2$ ), 129.6 ( $\times 2$ ); IR (neat) 3307, 2935, 2860, 2791, 1707, 1670  $\text{cm}^{-1}$ ; HRMS (ESI)  $m/z$  calcd for  $\text{C}_{23}\text{H}_{35}\text{N}_2\text{O}$  ( $[\text{M}+\text{H}]^+$ ), 355.2749, found 369.2527.

ID CMC-34-066-N File KF070808L10 Date 08-Jul-2008 Time 10:33:45 Description MDF008620

3: UV Detector: 214

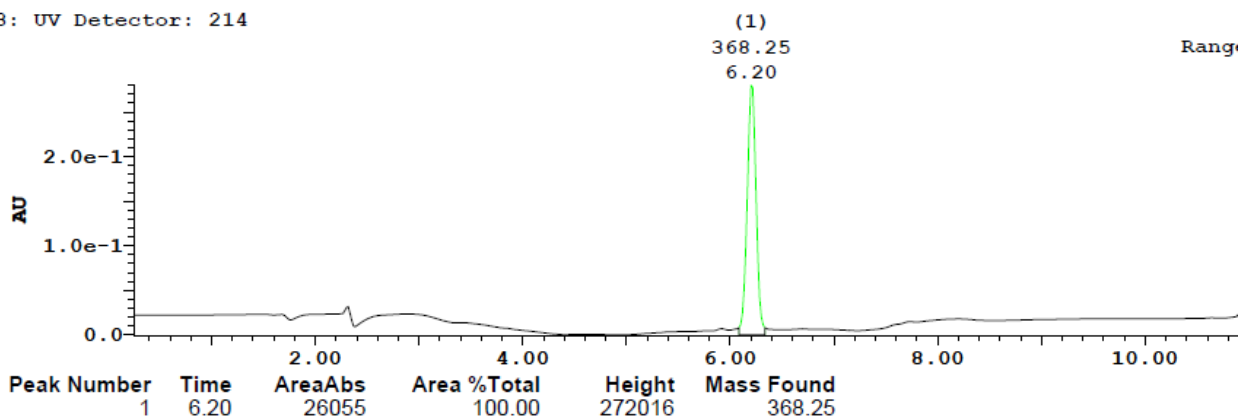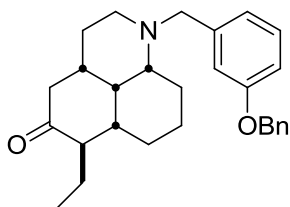

1-(3-(benzyloxy)benzyl)-6-ethyldecahydro-1H-benzo[de]quinolin-5(3a1H)-one **10{9}**. The general procedure afforded **10{9}** (34.6 mg, 0.083 mmol, 41% yield) as a sticky brown oil. HRMS (ESI)  $m/z$  calcd for  $\text{C}_{28}\text{H}_{36}\text{NO}_2$  ( $[\text{M}+\text{H}]^+$ ), 418.2746, found 418.2732.

3: UV Detector: 214

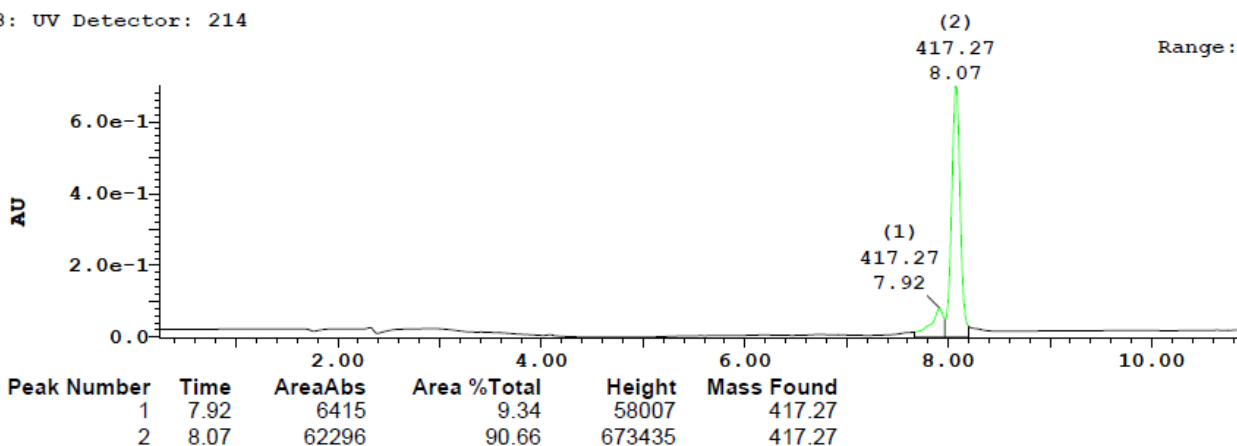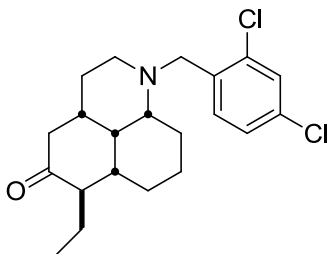

**1-(2,4-dichlorobenzyl)-6-ethyldecahydro-1H-benzo[de]quinolin-5(3a1H)-one 10{10}**. The general procedure afforded **10{10}** (31.6 mg, 0.083 mmol, 42% yield) as a viscous orange oil.  $^1\text{H}$  NMR (400 MHz,  $\text{CDCl}_3$ )  $\delta$  0.86 (t,  $J = 7.2$  Hz, 3 H), 0.96-1.20 (m, 2 H), 1.27-1.71 (complex, 9 H), 1.85 (m, 1 H), 1.92-2.24 (complex, 6 H), 2.34 (dd,  $J = 3.6, 12.8$  Hz, 1 H), 2.81 (td,  $J = 3.2, 11.2$  Hz, 1 H), 3.28 (d,  $J = 15.2$  Hz, 1 H), 4.08 (d,  $J = 15.2$  Hz, 1 H), 7.21 (dd,  $J = 2.0, 8.4$  Hz, 1 H), 7.34 (d,  $J = 2.0$  Hz, 1 H), 7.53 (d,  $J = 8.4$  Hz, 1 H);  $^{13}\text{C}$  NMR (100 MHz,  $\text{CDCl}_3$ )  $\delta$  u: 18.0, 24.6, 30.6, 31.5, 33.2, 48.8, 53.7, 53.9, 132.5, 134.0, 136.8, 210.7; d: 11.2, 41.5, 44.7, 51.0, 56.2, 66.1, 126.8, 128.9, 131.2; IR (neat) 2928, 2859, 2797, 1711  $\text{cm}^{-1}$ ; HRMS (ESI)  $m/z$  calcd for  $\text{C}_{21}\text{H}_{28}\text{Cl}_2\text{NO}$  ( $[\text{M}+\text{H}]^+$ ), 380.1548, found 380.1541.

3: UV Detector: 214

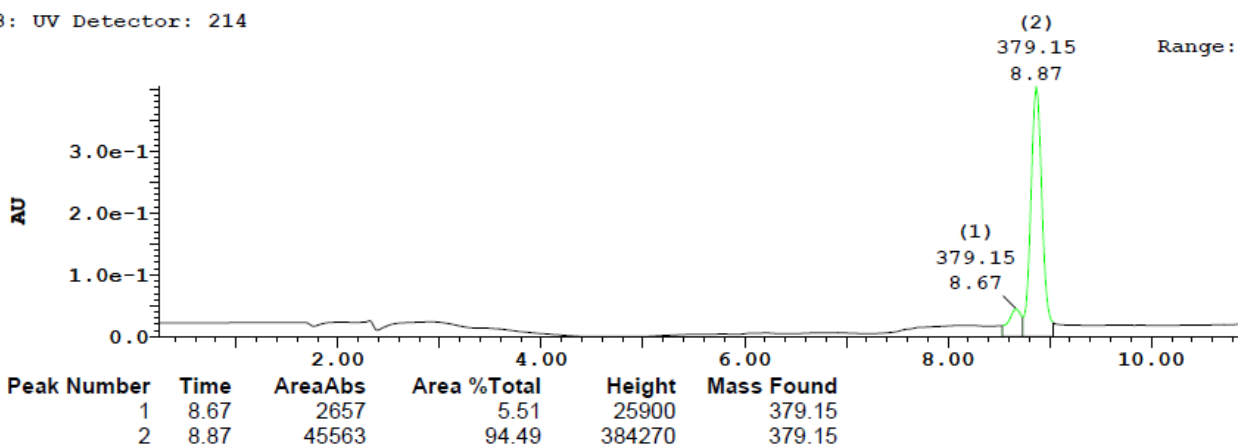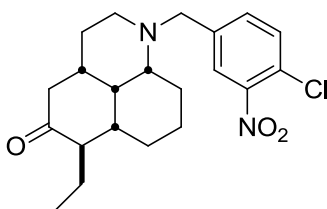

**1-(4-Chloro-3-nitrobenzyl)-6-ethyldecahydro-1H-benzo[de]quinolin-5(3a1H)-one 10{II}.**

The general procedure afforded 10{II} (34.7 mg, 0.089 mmol, 44% yield) as a sticky brown oil.

HRMS (ESI)  $m/z$  calcd for  $C_{21}H_{28}ClN_2O_3$  ( $[M+H]^+$ ), 391.1788, found 391.1777.

3: UV Detector: 214

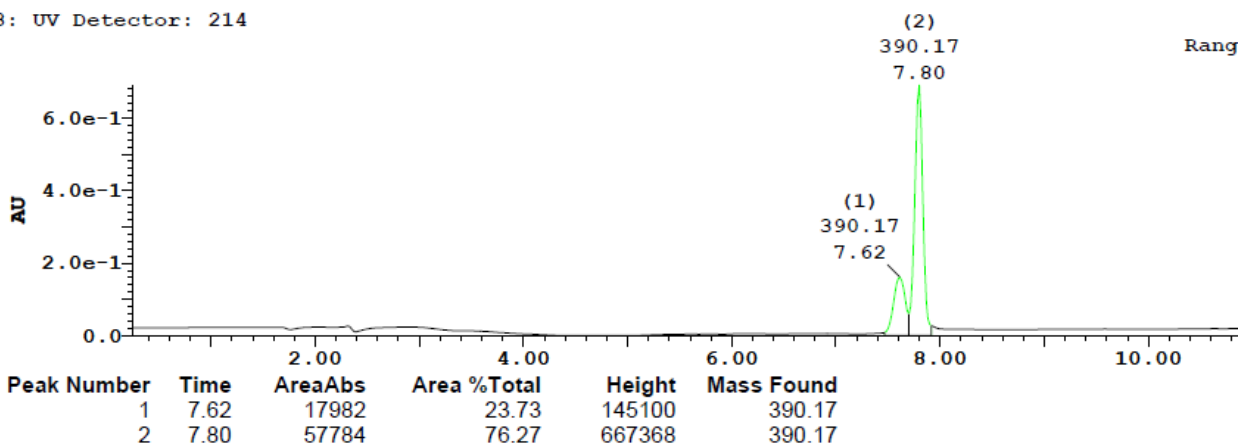

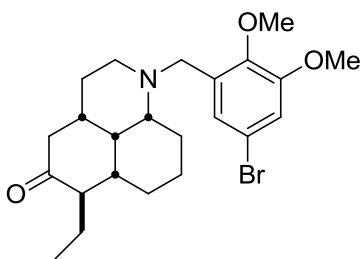

**1-(5-Bromo-2,3-dimethoxybenzyl)-6-ethyldecahydro-1H-benzo[de]quinolin-5(3a1H)-one 10{12}**. The general procedure afforded **10{12}** (24.3 mg, 0.054 mmol, 27% yield) as a sticky orange oil. HRMS (ESI)  $m/z$  calcd for  $C_{23}H_{33}BrNO_3$  ( $[M+H]^+$ ), 450.1644, found 450.1635.

ID CMC-34-066-R File KF070808L14 Date 08-Jul-2008 Time 11:23:13 Description MDF008558

3: UV Detector: 214

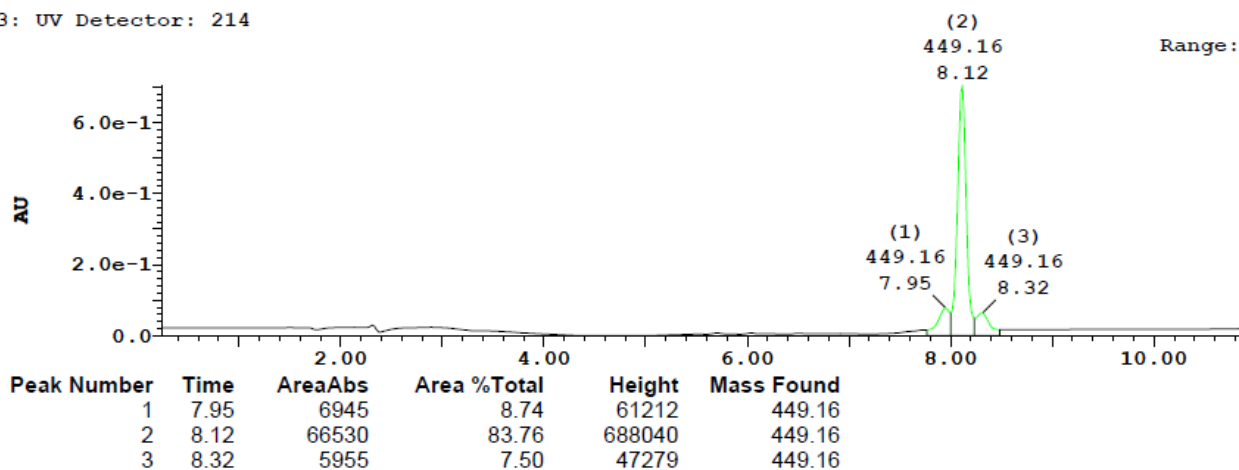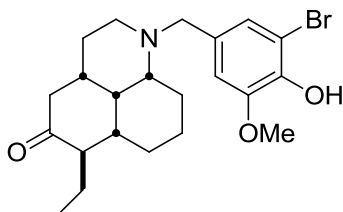

**1-(3-Bromo-4-hydroxy-5-methoxybenzyl)-6-ethyldecahydro-1H-benzo[de]quinolin-5(3a1H)-one 10{13}**. The general procedure afforded **10{13}** (3.7 mg, 0.008 mmol, 4% yield, 80% purity) as an orange oil. HRMS (ESI)  $m/z$  calcd for  $C_{22}H_{31}BrNO_3$  ( $[M+H]^+$ ), 436.1487, found 436.1470.

3: UV Detector: 214

Range:

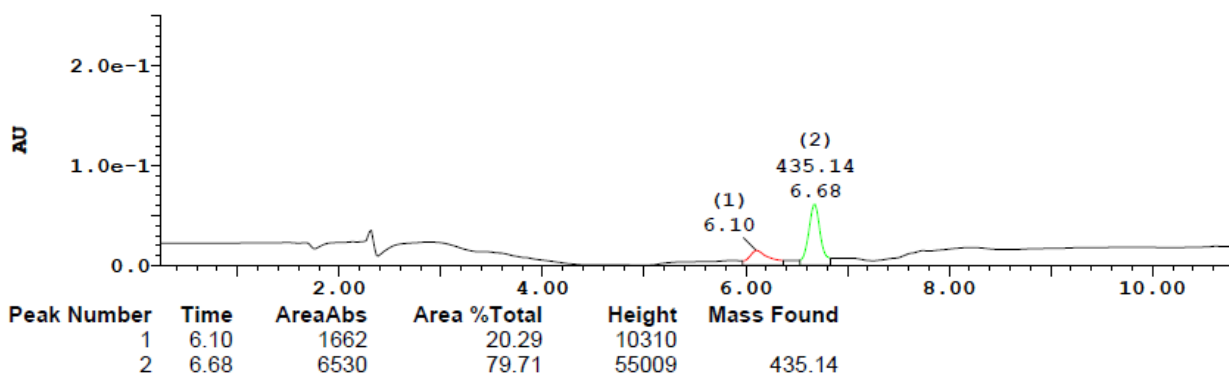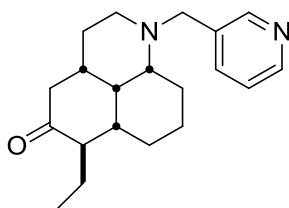

**6-Ethyl-1-(pyridin-3-ylmethyl)decahydro-1H-benzo[de]quinolin-5(3a1H)-one 10{14}**. The general procedure afforded **10{14}** (32.4 mg, 0.104 mmol, 52% yield) as a viscous orange oil.  $^1\text{H}$  NMR (400 MHz,  $\text{CDCl}_3$ )  $\delta$  0.85 (t,  $J = 7.2$  Hz, 3 H), 1.08 (dt,  $J = 3.6, 12.8$  Hz, 1 H), 1.21-1.73 (complex, 9 H), 1.88-2.15 (complex, 6 H), 2.26 (m, 1 H), 2.33 (dd,  $J = 3.6, 13.2$  Hz, 1 H), 2.82 (td,  $J = 2.8, 12.0$  Hz, 1 H), 3.24 (d,  $J = 14.0$  Hz, 1 H), 4.12 (d,  $J = 14.0$  Hz, 1 H), 7.25 (dd,  $J = 4.8, 7.6$  Hz, 1 H), 7.65 (td,  $J = 2.0, 7.6$  Hz, 1 H), 8.49 (dd,  $J = 1.6, 4.8$  Hz, 1 H), 8.53 (d,  $J = 2.0$  Hz, 1 H);  $^{13}\text{C}$  NMR (100 MHz,  $\text{CDCl}_3$ )  $\delta$  u: 17.9, 24.5, 30.6, 31.4, 33.0, 48.7, 53.0, 54.7, 135.0, 210.6; d: 11.2, 41.4, 44.6, 50.9, 56.1, 65.3, 123.2, 136.4, 148.2, 150.2; IR (neat) 3400, 2932, 2859, 2792, 1709  $\text{cm}^{-1}$ ; HRMS (ESI)  $m/z$  calcd for  $\text{C}_{20}\text{H}_{29}\text{N}_2\text{O}$  ( $[\text{M}+\text{H}]^+$ ), 313.2280, found 313.2294.

3: UV Detector: 214

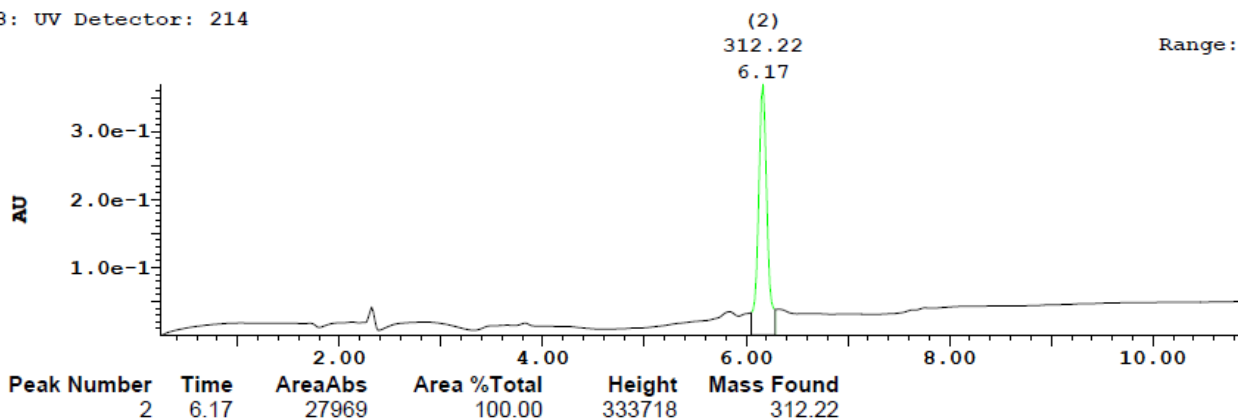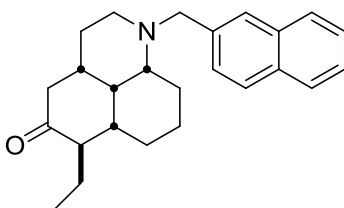

**6-Ethyl-1-(naphthalen-2-ylmethyl)decahydro-1H-benzo[de]quinolin-5(3a1H)-one 10{15}.**

The general procedure afforded **10{15}** (21.0 mg, 0.058 mmol, 29% yield) as a viscous orange oil.  $^1\text{H}$  NMR (400 MHz,  $\text{CDCl}_3$ )  $\delta$  0.86 (t,  $J = 7.2$  Hz, 3 H), 1.09 (m, 1 H), 1.28-1.60 (complex, 8 H), 1.68 (m, 1 H), 1.90-2.16 (complex, 6 H), 2.32 (dd,  $J = 3.6, 12.8$  Hz, 1 H), 2.37 (m, 1 H), 2.89 (td,  $J = 3.2, 11.6$  Hz, 1 H), 3.34 (d,  $J = 13.2$  Hz, 1 H), 4.31 (d,  $J = 13.6$  Hz, 1 H), 7.44-7.48 (m, 3 H), 7.72 (s, 1 H), 7.78-7.83 (m, 3 H);  $^{13}\text{C}$  NMR (100 MHz,  $\text{CDCl}_3$ )  $\delta$  u: 18.0, 24.6, 30.5, 31.5, 33.1, 48.8, 53.0, 57.6, 132.6, 133.3, 137.1, 210.8; d: 11.2, 41.6, 44.8, 50.9, 56.2, 65.6, 125.5, 125.9, 127.3, 127.4, 127.6 ( $\times 2$ ), 127.8; 3397, 2930, 2858, 2793, 1710  $\text{cm}^{-1}$ ; HRMS (ESI)  $m/z$  calcd for  $\text{C}_{25}\text{H}_{32}\text{NO}$  ( $[\text{M}+\text{H}]^+$ ), 362.2484, found 362.2486.



3: UV Detector: 214

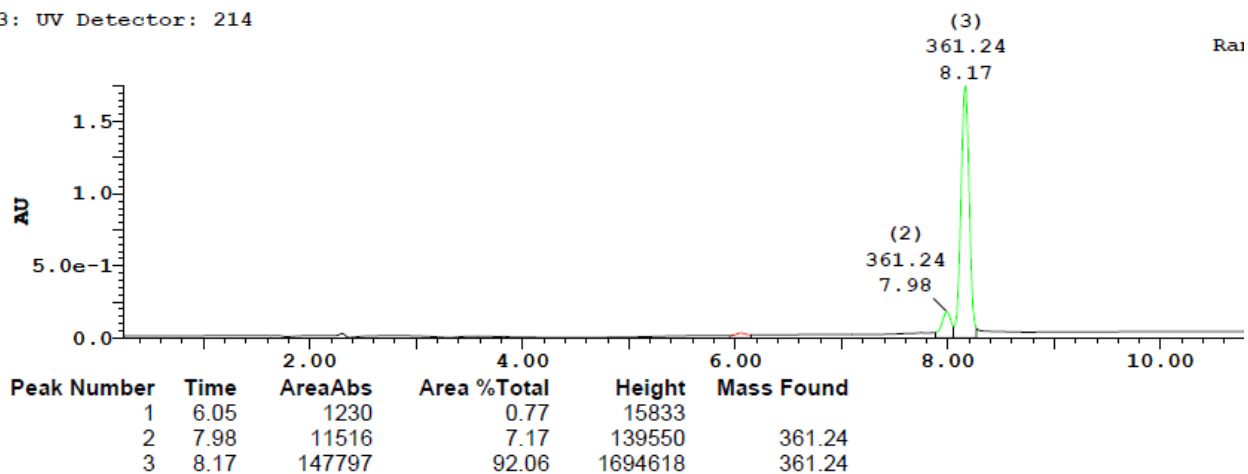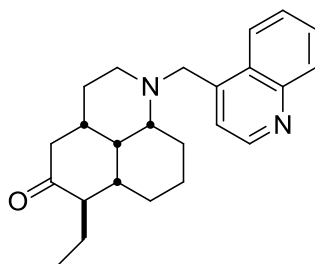

**6-Ethyl-1-(quinolin-4-ylmethyl)decahydro-1H-benzo[de]quinolin-5(3aH)-one *10{I6}***. The general procedure afforded **10{I6}** (34.7 mg, 0.096 mmol, 48% yield) as a viscous orange oil.  $^1\text{H}$  NMR (400 MHz,  $\text{CDCl}_3$ )  $\delta$  0.87 (t,  $J = 8.0$  Hz, 3 H), 1.28-1.72 (complex, 8 H), 1.83-2.28 (complex, 8 H), 2.34 (dd,  $J = 4.0, 12.0$  Hz, 1 H), 2.77 (td,  $J = 3.2, 11.6$  Hz, 1 H), 3.47 (d,  $J = 15.2$  Hz, 1 H), 3.74 (t,  $J = 6.8$  Hz, 1 H), 4.65 (d,  $J = 14.4$  Hz, 1 H), 7.53 (d,  $J = 4.0$  Hz, 1 H), 7.55 (ddd,  $J = 1.2, 7.2, 8.0$  Hz, 1 H), 7.71 (ddd,  $J = 1.2, 7.2, 8.4$  Hz, 1 H), 8.12 (dd,  $J = 0.8, 8.4$  Hz, 1 H), 8.28 (dd,  $J = 0.4, 8.0$  Hz, 1 H), 8.85 (d,  $J = 4.4$  Hz, 1 H);  $^{13}\text{C}$  NMR (100 MHz,  $\text{CDCl}_3$ )  $\delta$  u: 17.9, 24.6, 30.5, 31.4, 33.2, 48.7, 53.8, 54.8, 127.4, 146.2, 148.2, 210.7; d: 11.2, 41.5, 44.7, 51.0, 56.2, 66.6, 121.1, 123.8, 126.1, 129.0, 150.1; IR (neat) 3399, 2937, 2859, 2796, 1709  $\text{cm}^{-1}$ ; HRMS (ESI)  $m/z$  calcd for  $\text{C}_{24}\text{H}_{31}\text{N}_2\text{O}$  ( $[\text{M}+\text{H}]^+$ ), 363.2436, found 363.2424.

3: UV Detector: 214

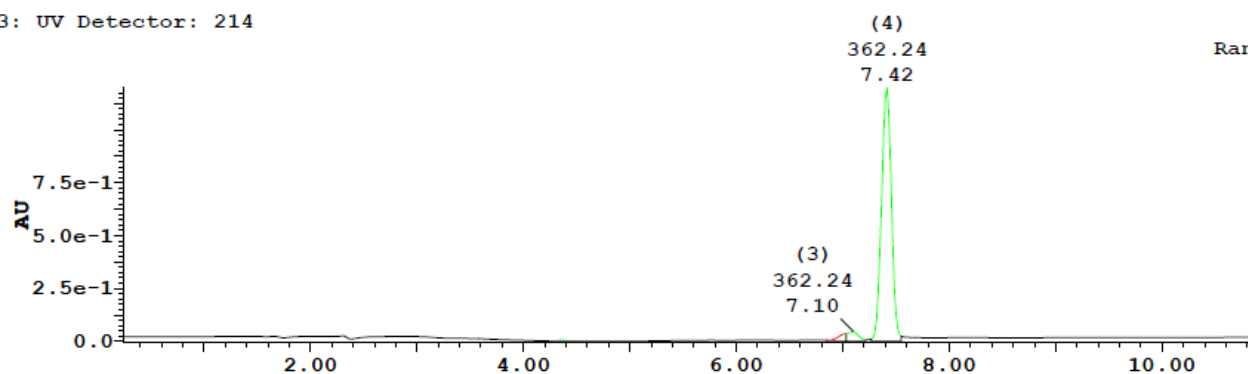

| Peak Number | Time | AreaAbs | Area %Total | Height  | Mass Found |
|-------------|------|---------|-------------|---------|------------|
| 1           | 4.35 | 439     | 0.34        | 5765    | 362.24     |
| 2           | 7.03 | 2315    | 1.76        | 30311   | 362.24     |
| 3           | 7.10 | 4215    | 3.21        | 38245   | 362.24     |
| 4           | 7.42 | 124202  | 94.69       | 1181875 | 362.24     |

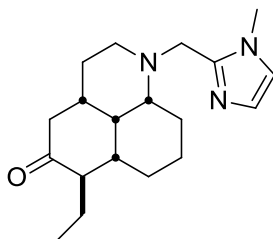

**6-ethyl-1-((1-methyl-1H-imidazol-2-yl)methyl)decahydro-1H-benzo[de]quinolin-5(3a1H)-one 10{17}**. The general procedure afforded **10{17}** (26.1 mg, 0.083 mmol, 41% yield) as a viscous orange oil.  $^1\text{H}$  NMR (400 MHz,  $\text{CDCl}_3$ )  $\delta$  0.85 (t,  $J = 7.6$  Hz, 3 H), 1.05 (dt,  $J = 3.2, 13.2$  Hz, 1 H), 1.16-1.28 (m, 2 H), 1.30-1.39 (m, 3 H), 1.47-1.59 (m, 3 H), 1.68 (m, 1 H), 1.87-2.18 (complex, 6 H), 2.32 (dd,  $J = 4.0, 12.8$  Hz, 1 H), 2.33 (m, 1 H), 2.70 (td,  $J = 2.8, 11.6$  Hz, 1 H), 3.34 (d,  $J = 13.6$  Hz, 1 H), 3.72 (s, 3 H), 4.17 (d,  $J = 13.6$  Hz, 1 H), 6.83 (d,  $J = 1.2$  Hz, 1 H), 6.92 (d,  $J = 1.2$  Hz, 1 H);  $^{13}\text{C}$  NMR (100 MHz,  $\text{CDCl}_3$ )  $\delta$  u: 17.9, 24.5, 30.1, 31.4, 33.1, 48.7, 49.7, 52.8, 145.6, 210.6; d: 11.1, 33.0, 41.4, 44.5, 50.8, 56.1, 65.6, 121.4, 127.0; IR (neat) 3392, 2938, 2860, 1707  $\text{cm}^{-1}$ ; HRMS (ESI)  $m/z$  calcd for  $\text{C}_{19}\text{H}_{30}\text{N}_3\text{O}$  ( $[\text{M}+\text{H}]^+$ ), 316.2389, found 316.2376.

3: UV Detector: 214

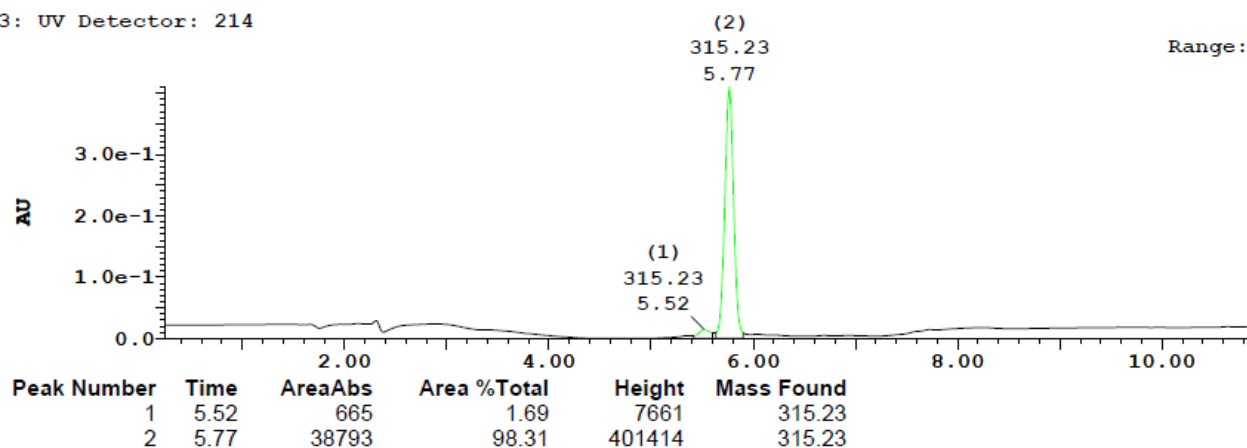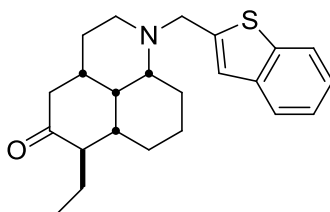

**1-(Benzo[b]thiophen-2-ylmethyl)-6-ethyldecahydro-1H-benzo[de]quinolin-5(3a1H)-one**

**10{18}**. The general procedure afforded **10{18}** (25.9 mg, 0.070 mmol, 35% yield) as a viscous yellow oil.  $^1\text{H}$  NMR (400 MHz,  $\text{CDCl}_3$ )  $\delta$  0.84 (t,  $J = 7.2$  Hz, 3 H), 1.03-1.12 (m, 1 H), 1.25-1.70 (complex, 9 H), 1.84-2.16 (complex, 5 H), 2.24-2.36 (m, 3 H), 2.99 (td,  $J = 3.2, 11.6$  Hz, 1 H), 3.88 (d,  $J = 14.8$  Hz, 1 H), 4.21 (dd,  $J = 0.8, 15.2$  Hz, 1 H), 7.11 (d,  $J = 0.8$  Hz, 1 H), 7.28-7.34 (m, 2 H), 7.69 (dd,  $J = 1.6, 7.2$  Hz, 1 H), 7.78 (m, 1 H);  $^{13}\text{C}$  NMR (100 MHz,  $\text{CDCl}_3$ )  $\delta$  u: 18.0, 24.5, 30.4, 31.4, 33.3, 48.8, 52.3, 53.0, 137.6, 139.7, 143.0, 210.7; d: 11.2, 41.4, 44.6, 51.0, 56.2, 64.1, 122.2, 122.4, 123.0, 123.8, 124.1; IR (neat) 3400, 2932, 2858, 2795, 1709  $\text{cm}^{-1}$ ; HRMS (ESI)  $m/z$  calcd for  $\text{C}_{23}\text{H}_{30}\text{NOS}$  ( $[\text{M}+\text{H}]^+$ ), 368.2048, found 368.2034.

3: UV Detector: 214

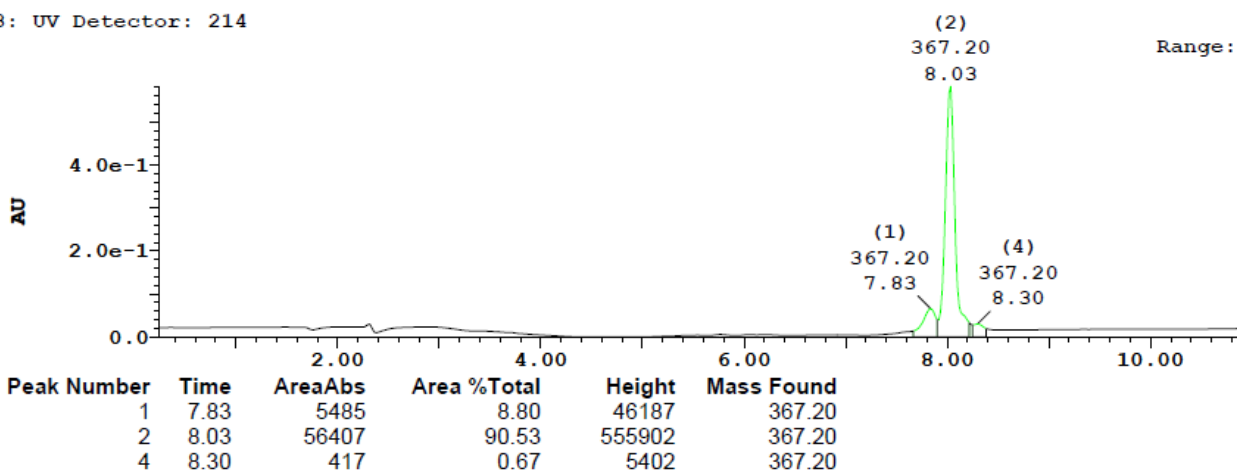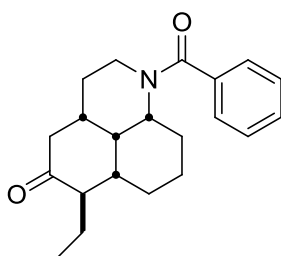

**1-Benzoyl-6-ethyldecahydro-1H-benzo[de]quinolin-5(3a1H)-one 11{19}**. The tricyclic amine (46 mg, 0.21 mmol), triethyl amine (63 mg, 0.62 mmol, 3.0 equiv.) and benzoyl chloride (58 mg, 0.42 mmol, 2.0 equiv.) were dissolved in THF (2.0 mL) then stirred at rt 16 h. The reaction mixture was diluted with 0.5 N HCL (3 mL) and extracted with EtOAc (2 × 3 mL). The combined organics were dried (Na<sub>2</sub>SO<sub>4</sub>), concentrated and the residue purified by silica chromatography to yield the amide **11{19}** (36 mg, 0.111 mmol, 53% yield) as a light orange oil.  $R_f = 0.58$  (1:1 acetone:CH<sub>2</sub>Cl<sub>2</sub>); <sup>1</sup>H NMR δ 0.87 (t,  $J = 7.2$  Hz, 3 H), 1.10 (m, 2 H), 1.10-1.84 (complex, 11 H), 1.88-2.18 (complex, 3 H), 2.29 (m, 4 H), 2.47 (dd,  $J = 4.4$  Hz, 1 H), 3.40-3.57 (m, 2 H), 7.40 (m, 5 H); <sup>13</sup>C NMR δ d 11.3, 37.0, 45.7, 46.5, 56.0, 60.2, 126.9 (×2), 128.4 (×2), 129.5; u 17.9, 24.7, 29.7, 31.4, 32.1, 43.1, 49.0, 137.2, 171.7, 209.9; IR (neat) 2928, 2858, 1706, 1623 cm<sup>-1</sup>; HRMS calcd for C<sub>21</sub>H<sub>28</sub>NO<sub>2</sub> [M + H] 326.2120, obsd 326.2109.

3: UV Detector: 214

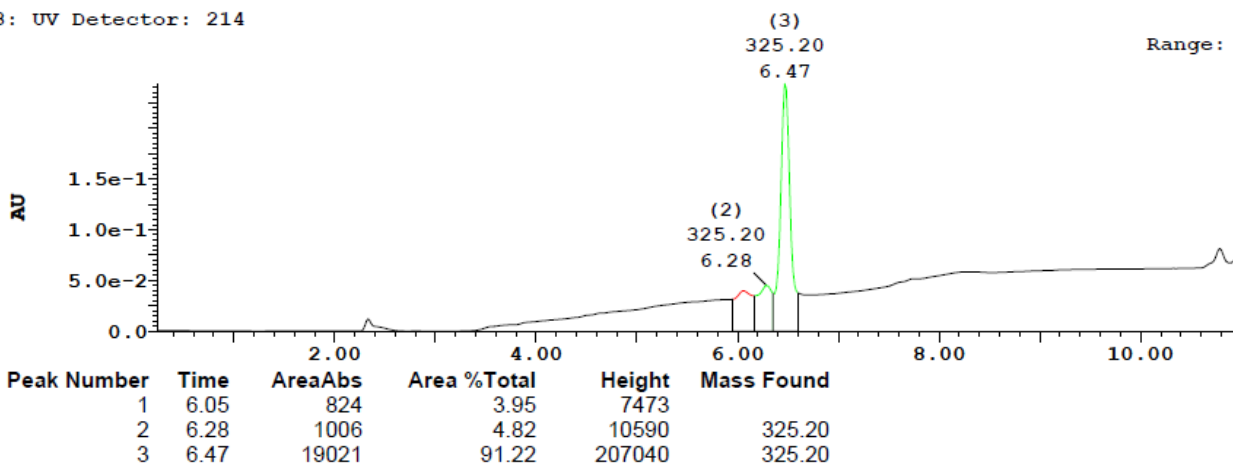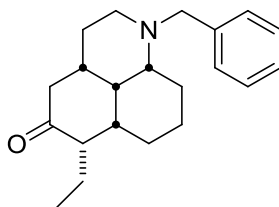

**1-Benzyl-6-ethyldecahydro-1H-benzo[de]quinolin-5(3a1H)-one **10{20}****. The general procedure (adjusted for the new quantity of starting amine (47 mg, 0.21 mmol) and omitting the  $K_2CO_3$  epimerization step) afforded **10{20}** (21 mg, 0.067 mmol, 32% yield) as a light yellow oil.  $^1H$  NMR (400 MHz,  $CDCl_3$ )  $\delta$  0.81 (t,  $J = 7.6$  Hz, 3 H), 1.19 (m, 1 H), 1.30-1.50 (complex, 6 H), 1.55 (m, 2 H), 1.68 (m, 2 H), 1.88 (m, 2 H), 2.03 (dt,  $J = 3.2, 12.0$  Hz, 1 H), 2.13 (m, 1 H), 2.19-2.30 (m, 3 H), 2.86 (td,  $J = 3.6, 11.2$  Hz, 1 H), 3.17 (d,  $J = 13.2$  Hz, 1 H), 4.12 (d,  $J = 13.2$  Hz, 1 H), 7.21-7.33 (complex, 5 H);  $^{13}C$  NMR (100 MHz,  $CDCl_3$ )  $\delta$  u: 19.7, 24.8, 29.3, 30.4, 33.1, 44.6, 53.2, 57.4, 139.4, 214.2; d: 11.8, 42.5, 44.2, 44.9, 57.3, 66.3, 126.7, 128.1 ( $\times 2$ ), 129.0 ( $\times 2$ ); IR (neat) 2929, 2860, 1709, 1665  $cm^{-1}$ ; HRMS (ESI)  $m/z$  calcd for  $C_{21}H_{30}NO$  ( $[M+H]^+$ ), 312.2327, found 312.2316.

3: UV Detector: 214

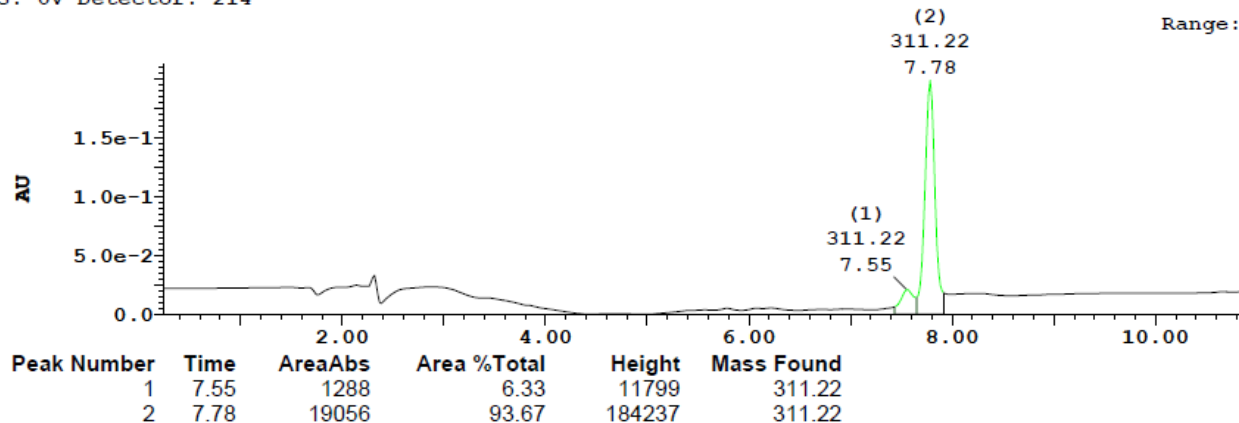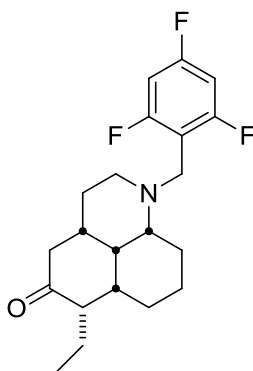

**6-Ethyl-1-(2,4,6-trifluorobenzyl)decahydro-1H-benzo[de]quinolin-5(3a1H)-one **10{21}****. The general procedure (adjusted for the new quantity of starting amine (59 mg, 0.268 mmol) and omitting the  $K_2CO_3$  epimerization step) afforded **10{21}** (50 mg, 0.137 mmol, 51% yield) as a viscous light orange oil.  $^1H$  NMR (400 MHz,  $CDCl_3$ )  $\delta$  0.79 (t,  $J = 7.6$  Hz, 3 H), 1.25 (m, 1 H), 1.32-1.56 (complex, 7 H), 1.59-1.72 (m, 2 H), 1.85-1.94 (m, 2 H), 2.11 (m, 2 H), 2.18-2.29 (m, 2 H), 2.40 (dd,  $J = 3.2, 12.0$  Hz, 2 H), 2.87 (d,  $J = 11.6$  Hz, 1 H), 3.31 (d,  $J = 12.8$  Hz, 1 H), 4.08 (d,  $J = 13.2$  Hz, 1 H), 6.66 (q,  $J = 8.8, 7.6$  Hz, 2 H);  $^{13}C$  NMR (100 MHz,  $CDCl_3$ )  $\delta$  u: 19.6, 24.7,

29.2, 32.6, 43.3, 44.4, 52.2, 52.3, 214.2; d: 11.7, 42.2, 44.2, 44.6, 57.2, 66.1, 100.1 (m, 2 C);

HRMS (ESI)  $m/z$  calcd for  $C_{21}H_{27}F_3NO$  ( $[M+H]^+$ ), 366.2045, found 366.2019.

ID CMC-34-052 File KF070808L24 Date 08-Jul-2008 Time 13:02:02 Description MDF008589

3: UV Detector: 214

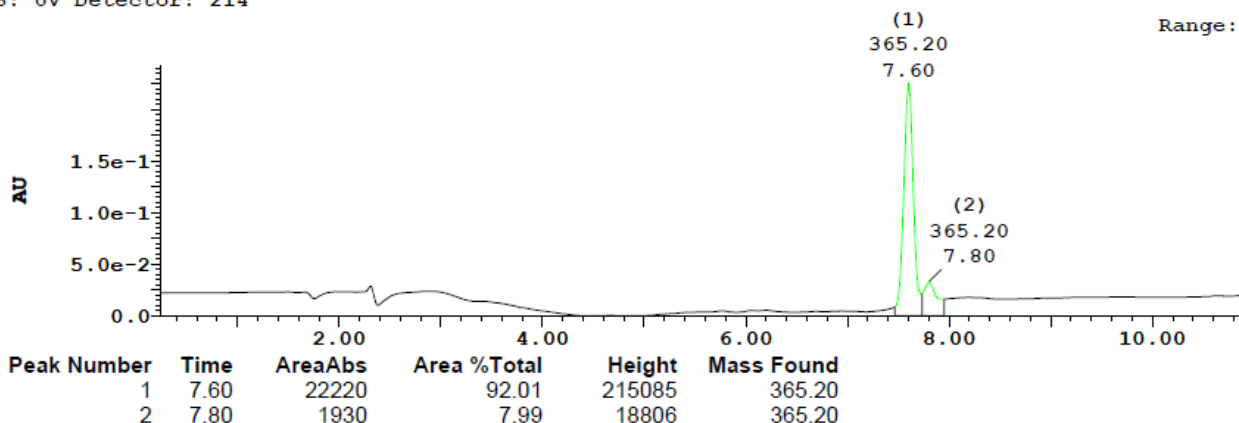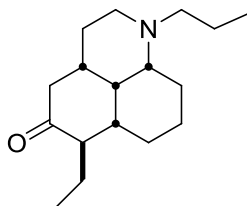

**6-Ethyl-1-propyldecahydro-1H-benzo[de]quinolin-5(3a1H)-one 10{22}**. The general procedure (adjusted for the altered quantity of starting amine (30.6 mg, 0.138 mmol)) afforded **10{22}** (12.4 mg, 0.047 mmol, 34% yield) as a viscous yellow oil.  $^1H$  NMR (400 MHz,  $CDCl_3$ )  $\delta$  0.83 (t,  $J = 7.2$  Hz, 3 H), 0.84 (t,  $J = 7.2$  Hz, 3 H), 1.03 (m, 1 H), 1.10-1.34 (complex, 4 H), 1.39-1.56 (complex, 5 H), 1.60-1.67 (m, 2 H), 1.84-1.94 (m, 3 H), 2.01 (m, 1 H), 2.11 (m, 1 H), 2.31 (m, 2 H), 2.47 (m, 1 H), 2.65 (m, 1 H), 2.94 (m, 1 H);  $^{13}C$  NMR (100 MHz,  $CDCl_3$ )  $\delta$  u: 17.4, 17.9, 24.6, 29.9, 31.3, 33.3, 48.8, 52.5, 55.1, 210.8; d: 11.1, 12.0, 41.5, 44.7, 50.8, 56.1, 63.9; IR

(neat) 2960, 2933, 2869, 1709  $\text{cm}^{-1}$ ; HRMS (ESI)  $m/z$  calcd for  $\text{C}_{17}\text{H}_{30}\text{NO}$  ( $[\text{M}+\text{H}]^+$ ), 264.2327, found 264.2327.

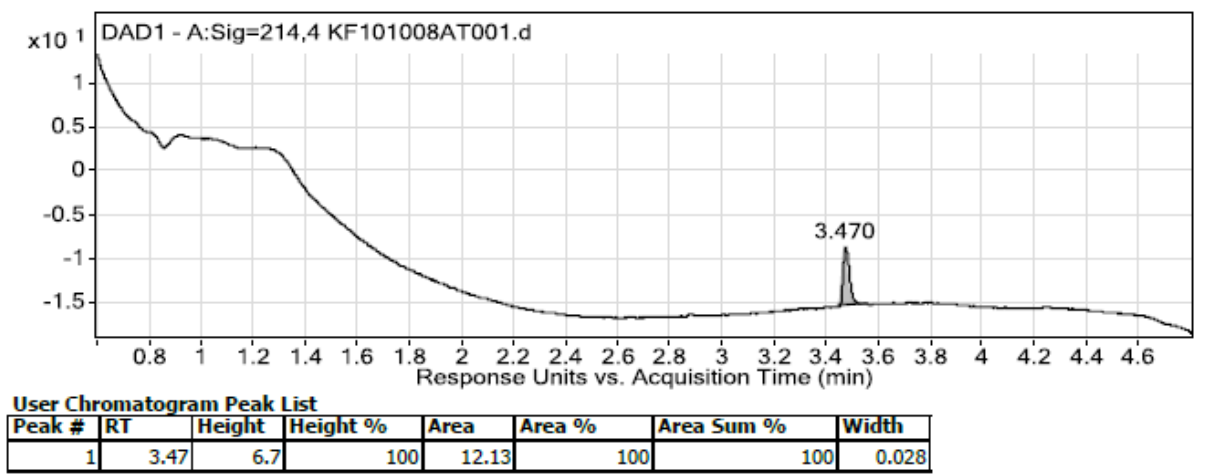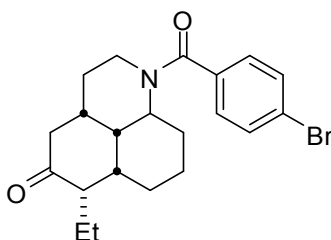

**1-(4-Bromobenzoyl)-6-ethyldecahydro-1H-benzo[de]quinolin-5(3a1H)-one 11{23}**. The tricyclic amine (32 mg, 0.15 mmol) and *p*-bromobenzoyl chloride were dissolved in  $\text{CH}_2\text{Cl}_2$  (1.0 mL) and pyridine (0.5 mL) and stirred at rt 16 h. The reaction mixture was concentrated and the residue purified by silica chromatography to yield the amide **11{23}** (37 mg, 0.092 mmol, 61% yield) as a light orange oil.  $R_f = 0.63$  (1:1 acetone: $\text{CH}_2\text{Cl}_2$ );  $^1\text{H}$  NMR  $\delta$  0.84 (t,  $J = 7.3$  Hz, 3 H), 1.26 (m, 2 H), 1.47 (m, 2 H), 1.55-1.77 (complex, 4 H), 1.80-1.92 (m, 4 H), 2.21-2.29 (m, 4 H), 3.34 (m, 2 H), 3.57 (m, 1 H), 7.30 (d,  $J = 8.6$  Hz, 2 H), 7.54 (d,  $J = 8.3$  Hz, 2 H);  $^{13}\text{C}$  NMR  $\delta$  d



11.7, 38.8, 40.7, 45.0, 56.8, 62.1, 128.7, 131.7;  $u$  19.6, 25.0, 29.1, 29.6, 32.4, 44.6, 44.9, 123.9, 136.1, 170.9, 212.8; IR (neat) 2930, 2858, 1707, 1629  $\text{cm}^{-1}$ ; HRMS calcd for  $\text{C}_{21}\text{H}_{27}\text{BrNO}_2$  [ $\text{M} + \text{H}$ ] 404.1225, obsd 404.1230.

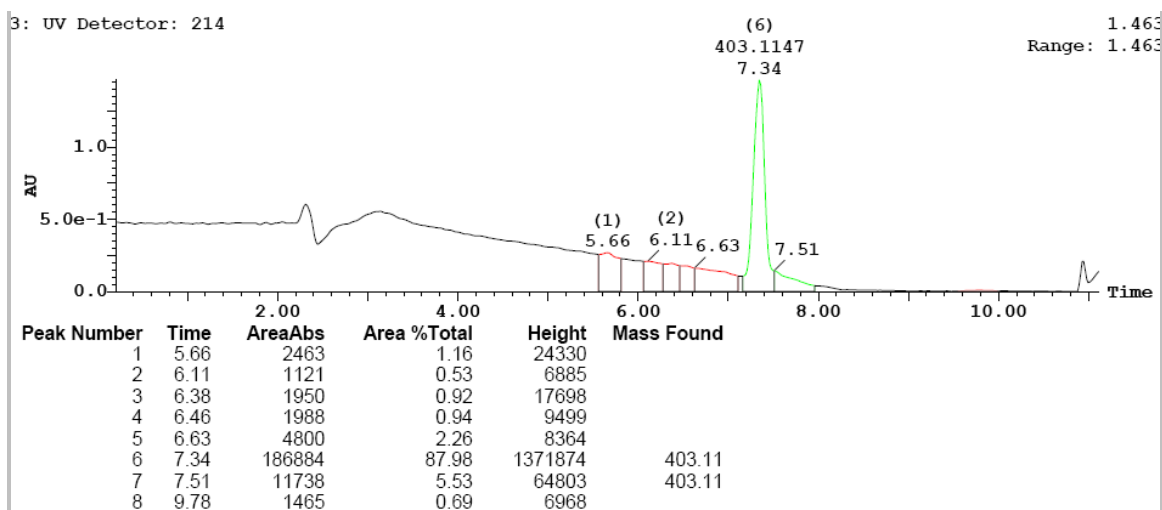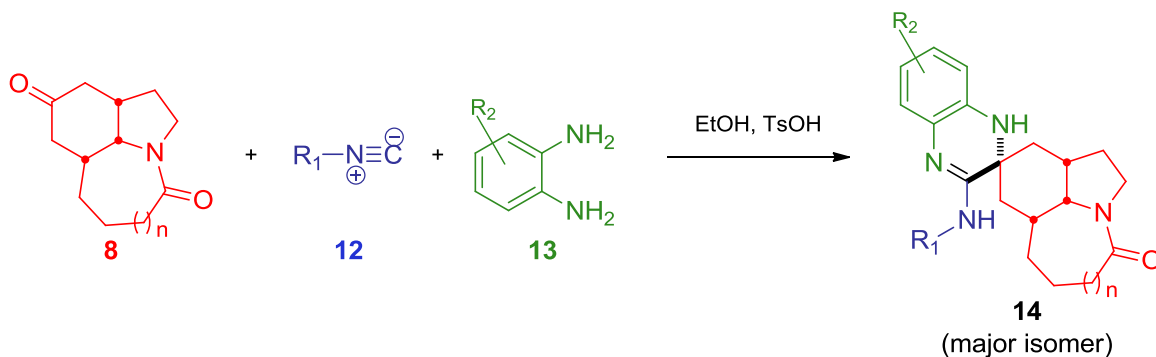

**General procedure A for the parallel synthesis of spiroheterocycles 14:** The reactions were performed in the 24-position Bohdan MiniBlock XT solution phase synthesis platform. Each tube of the MiniBlock platform was charged with a magnetic stirring bar, ketoamide **8a** (70 mg, 0.23 mmol), diamine fragment **13** (0.28 mmol, 1.2 equiv.) and *p*-toluenesulfonic acid (6 mg, 0.023 mmol, 0.1 equiv.). A solution of isonitrile **12** (0.28 mmol, 1.2 equiv.) in EtOH (2.0 mL)

was added via syringe through the septum and the reactions were stirred for 14 h at rt. Water (7 mL) was added to precipitate the products and the entire contents of each reaction tube was transferred to a fritted reaction tube in a second Miniblock platform. The collected precipitate was washed with NaOH (0.5 N, 2 mL) and water (3 mL) then dissolved in CH<sub>2</sub>Cl<sub>2</sub>. The organic soluble material was collected, the solvent removed in vacuo and the residue purified by mass-directed, reverse-phase HPLC purification.

**General procedure B for the parallel synthesis of spiroheterocycles 14:** The reactions were performed in the 24-position Bohdan MiniBlock XT solution phase synthesis platform. Each tube of the MiniBlock platform was charged with a magnetic stirring bar, ketoamide **8b** (70 mg, 0.34 mmol), diamine fragment **13** (0.41 mmol, 1.2 equiv.) and *p*-toluenesulfonic acid (6 mg, 0.034 mmol, 0.1 equiv.). A solution of isonitrile **12** (0.41 mmol, 1.2 equiv.) in EtOH (2.0 mL) was added via syringe through the septum and the reactions were stirred for 14 h at rt. Water (7 mL) was added to precipitate the products. The contents of each reaction tube was transferred to a fritted reaction tube in a second Miniblock platform. The collected precipitate was washed with NaOH (0.5 N, 2 mL) and water (3 mL) then dissolved in CH<sub>2</sub>Cl<sub>2</sub>. The organic soluble material was collected, the solvent removed in vacuo and the residue purified by mass-directed, reverse-phase HPLC purification.

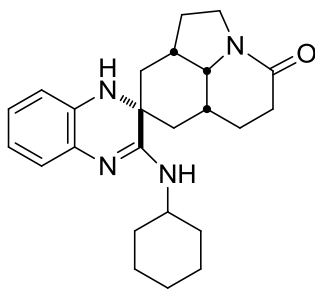

**3'-(Cyclohexylamino)-1,2,5,6,6a,7,9,9a-octahydro-1'H-spiro[pyrrolo[3,2,1-ij]quinoline-8,2'-quinoxalin]-4(31H)-one 14{1}**. General procedure A afforded the spiroheterocycle **14{1}** (26 mg, 0.066 mmol, 29% yield) as a tan solid. IR (neat) 3301, 2924, 2845, 1607, 1575  $\text{cm}^{-1}$ ; HRMS (ESI)  $m/z$  calcd for  $\text{C}_{24}\text{H}_{33}\text{N}_4\text{O}$  ( $[\text{M}+\text{H}]^+$ ) 393.2654, found 393.2654.

ID CMC-34-157-A1 File KF090408L01 Date 04-Sep-2008 Time 11:59:33 Description MDF009324

3: UV Detector: 214

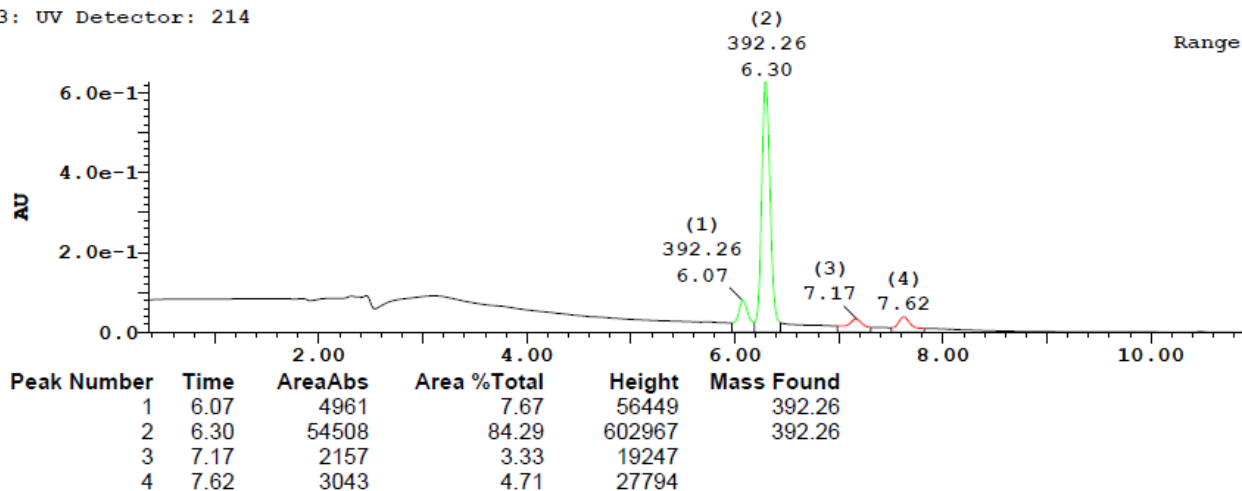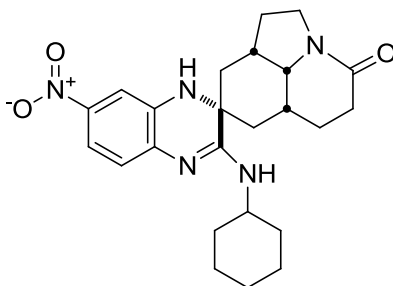

**3'-(Cyclohexylamino)-7'-nitro-1,2,5,6,6a,7,9,9a-octahydro-1'H-spiro[pyrrolo[3,2,1-ij]quinoline-8,2'-quinoxalin]-4(31H)-one 14{2}**. General procedure A afforded the spiroheterocycle **14{2}** (27 mg, 0.062 mmol, 27% yield) as a reddish-brown solid. MP > 260 °C;  $^1\text{H}$  NMR (400 MHz,  $\text{CD}_3\text{OD}$ )  $\delta$  1.09 (m, 1 H), 1.25-1.49 (m, 3 H), 1.67-1.83 (complex, 4 H), 1.95-2.09 (complex, 4 H), 2.26 (m, 3 H), 2.62 (m, 1 H), 3.31 (quin,  $J = 2.0$  Hz, 2 H), 3.52 (m, 2 H), 3.71-3.76 (complex, 4 H), 4.06 (m, 1 H), 7.03 (d,  $J = 8.4$  Hz, 1 H), 7.50 (d,  $J = 2.4$  Hz, 1 H),

7.62 (dd,  $J = 2.8, 8.8$  Hz, 1 H;  $^{13}\text{C}$  NMR (100 MHz,  $\text{CDCl}_3$ )  $\delta$  u: 26.2, 26.3, 26.5, 26.7, 27.4, 29.2, 32.6, 33.5, 33.6, 34.1, 44.1, 53.8, 68.9, 137.2, 143.4, 155.3, 171.5; d: 30.5, 38.6, 51.3, 60.3, 109.6, 116.3, 122.4; IR (neat) 3448, 3339, 3257, 2923, 2847, 1615, 1521, 1498, 1480  $\text{cm}^{-1}$ ; HRMS (ESI)  $m/z$  calcd for  $\text{C}_{24}\text{H}_{32}\text{N}_5\text{O}_3$  ( $[\text{M}+\text{H}]^+$ ) 438.2505, found 438.2510.

ID CMC-34-157-A2 File KF090408L02 Date 04-Sep-2008 Time 12:11:53 Description MDF009330

3: UV Detector: 214

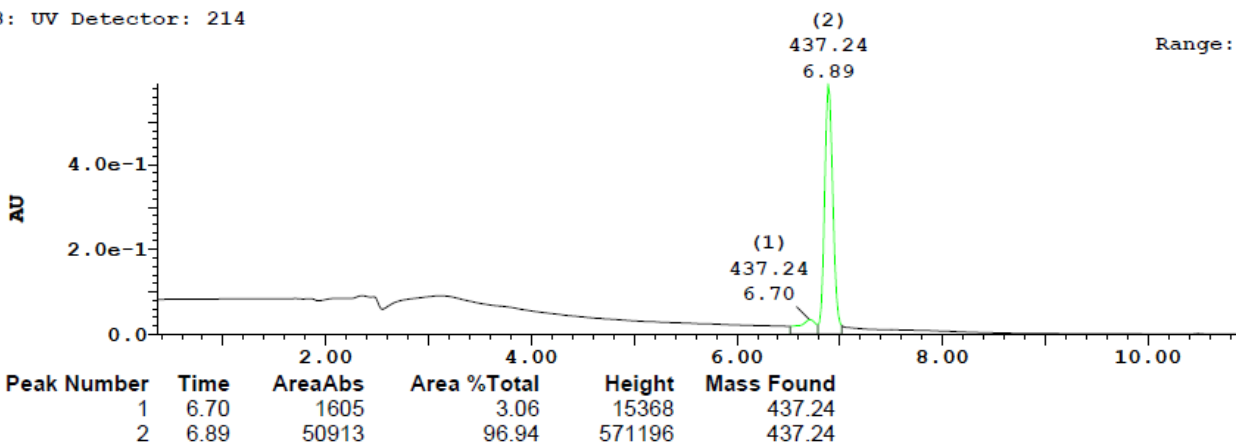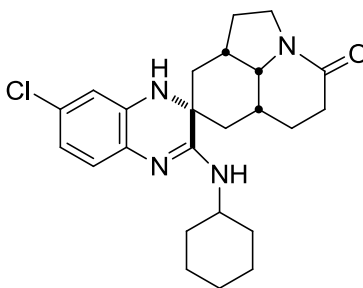

**7'-Chloro-3'-(cyclohexylamino)-1,2,5,6,6a,7,9,9a-octahydro-1'H-spiro[pyrrolo[3,2,1-ij]quinoline-8,2'-quinoxalin]-4(31H)-one 14{3}**. General procedure A afforded the spiroheterocycle **14{3}** (29 mg, 0.069 mmol, 30% yield) as a tan solid. HRMS (ESI)  $m/z$  calcd for  $\text{C}_{24}\text{H}_{32}\text{ClN}_4\text{O}$  ( $[\text{M}+\text{H}]^+$ ) 427.2265, found 427.2264.

3: UV Detector: 214

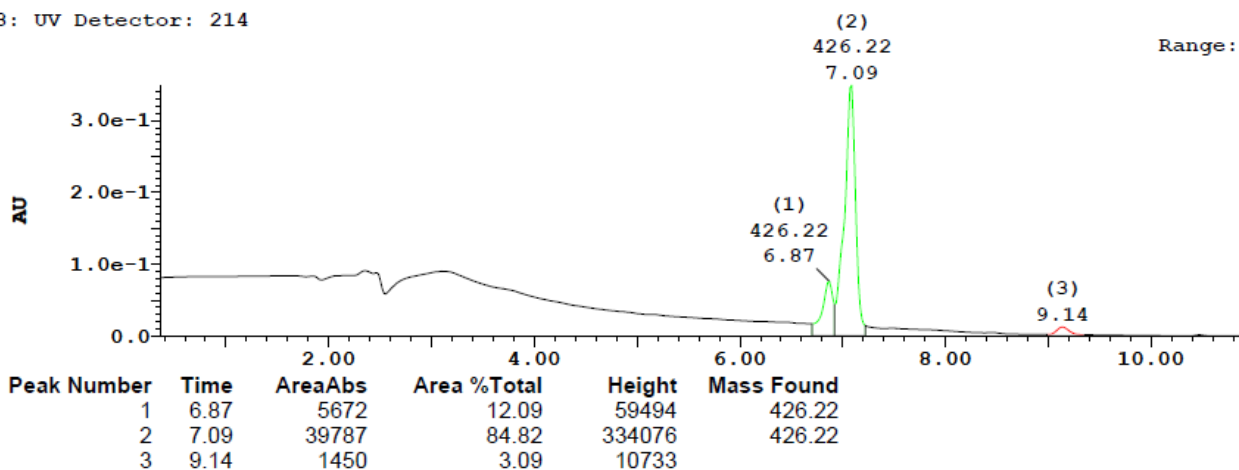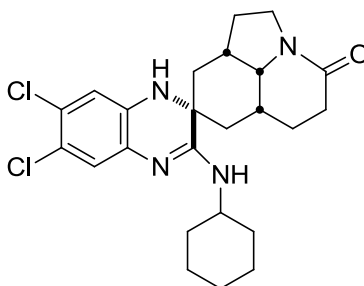

**6',7'-Dichloro-3'-(cyclohexylamino)-1,2,5,6,6a,7,9,9a-octahydro-1'H-spiro[pyrrolo[3,2,1-ij]quinoline-8,2'-quinoxalin]-4(31H)-one 14{4}**. General procedure A afforded the spiroheterocycle **14{4}** (7 mg, 0.02 mmol, 7% yield) as a brown solid. HRMS (ESI)  $m/z$  calcd for  $C_{24}H_{31}Cl_2N_4O$  ( $[M+H]^+$ ) 461.1875, found 461.1868.

3: UV Detector: 214

Range

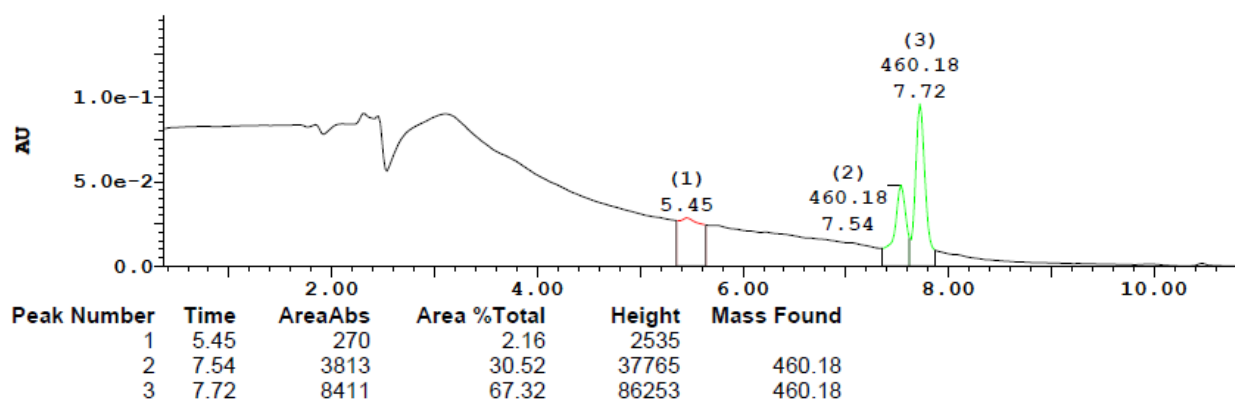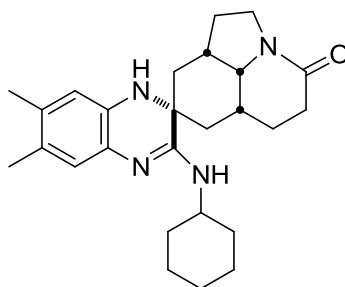

**3'-(Cyclohexylamino)-6',7'-dimethyl-1,2,5,6,6a,7,9,9a-octahydro-1'H-spiro[pyrrolo[3,2,1-ij]quinoline-8,2'-quinoxalin]-4(31H)-one 14{5}**. General procedure A afforded the spiroheterocycle **14{5}** (22 mg, 0.052 mmol, 23% yield) as a tan solid. HRMS (ESI)  $m/z$  calcd for  $C_{26}H_{37}N_4O$  ( $[M+H]^+$ ) 421.2967, found 421.2955.

3: UV Detector: 214

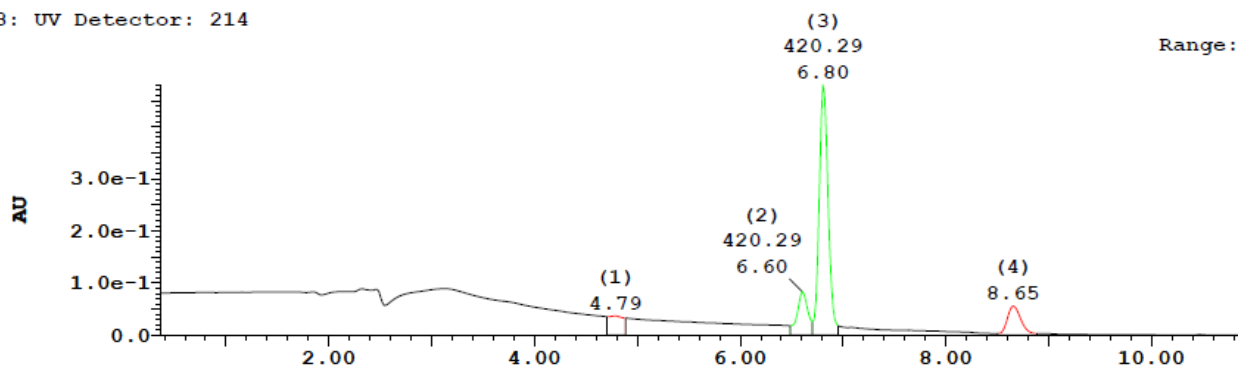

| Peak Number | Time | AreaAbs | Area %Total | Height | Mass Found |
|-------------|------|---------|-------------|--------|------------|
| 1           | 4.79 | 228     | 0.39        | 2848   |            |
| 2           | 6.60 | 6194    | 10.62       | 65175  | 420.29     |
| 3           | 6.80 | 44286   | 75.95       | 462580 | 420.29     |
| 4           | 8.65 | 7598    | 13.03       | 52708  |            |

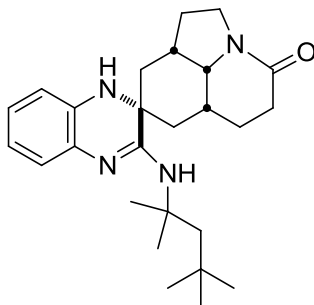

**3'-((2,4,4-Trimethylpentan-2-yl)amino)-1,2,5,6,6a,7,9,9a-octahydro-1'H-**

**spiro[pyrrolo[3,2,1-ij]quinoline-8,2'-quinoxalin]-4(31H)-one 14{6}**. General procedure A

afforded the spiroheterocycle **14{6}** (42 mg, 0.099 mmol, 43% yield) as a tan solid. HRMS (ESI)

$m/z$  calcd for  $C_{26}H_{39}N_4O$  ( $[M+H]^+$ ) 423.3124, found 423.3115.

3: UV Detector: 214

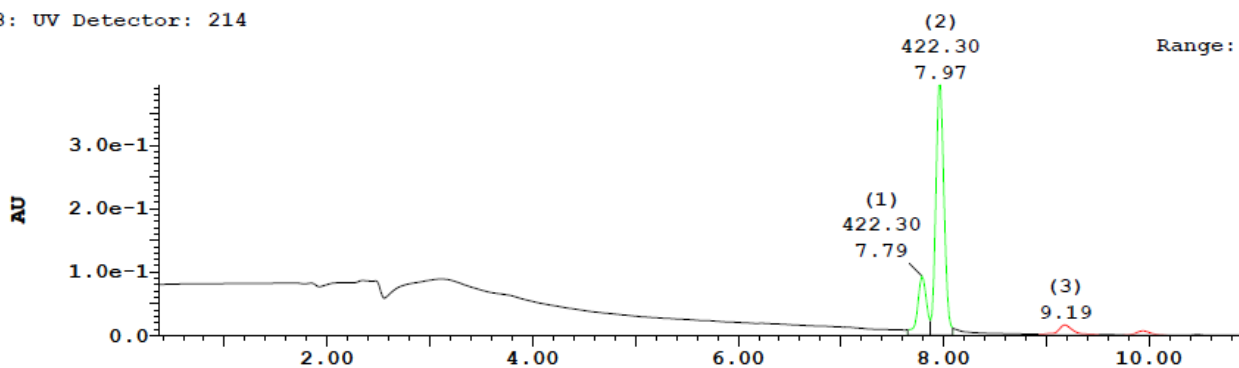

| Peak Number | Time | AreaAbs | Area %Total | Height | Mass Found |
|-------------|------|---------|-------------|--------|------------|
| 1           | 7.79 | 7356    | 16.39       | 83719  | 422.30     |
| 2           | 7.97 | 34327   | 76.48       | 383801 | 422.30     |
| 3           | 9.19 | 2213    | 4.93        | 14636  |            |
| 4           | 9.94 | 986     | 2.20        | 6467   |            |

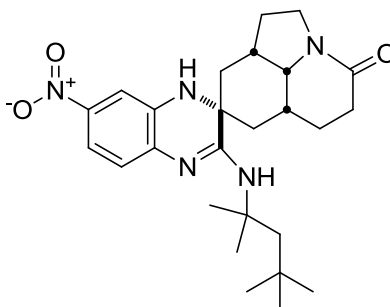

**7'-Nitro-3'-((2,4,4-trimethylpentan-2-yl)amino)-1,2,5,6,6a,7,9,9a-octahydro-1'H-spiro[pyrrolo[3,2,1-ij]quinoline-8,2'-quinoxalin]-4(31H)-one 14{7}**. General procedure A afforded the spiroheterocycle **14{7}** (17 mg, 0.036 mmol, 16% yield) as a red solid. HRMS (ESI)  $m/z$  calcd for  $C_{26}H_{38}N_5O_3$  ( $[M+H]^+$ ) 468.2975, found 468.2980.



3: UV Detector: 214

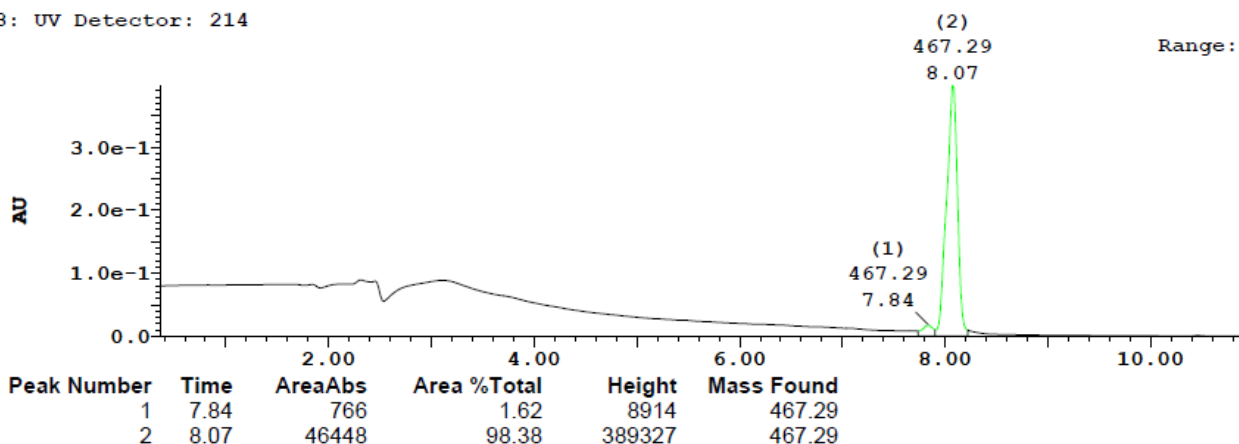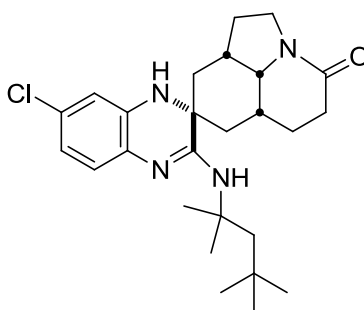

**7'-Chloro-3'-((2,4,4-trimethylpentan-2-yl)amino)-1,2,5,6,6a,7,9,9a-octahydro-1'H-spiro[pyrrolo[3,2,1-ij]quinoline-8,2'-quinoxalin]-4(31H)-one 14{8}**. General procedure A afforded the spiroheterocycle **14{8}** (60 mg, 0.13 mmol, 57% yield) as a brown solid. HRMS (ESI)  $m/z$  calcd for  $C_{26}H_{38}ClN_4O$  ( $[M+H]^+$ ) 457.2734, found 457.2730.

3: UV Detector: 214

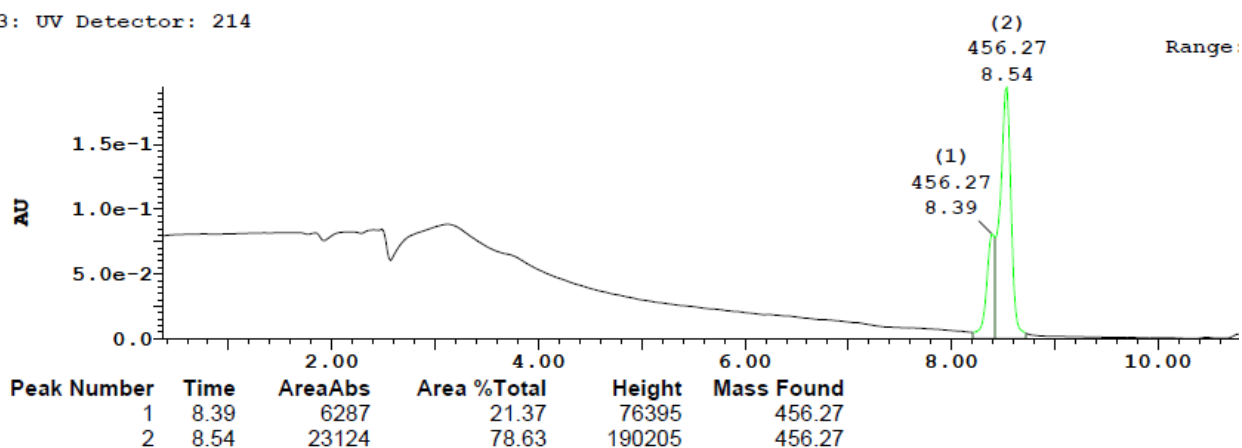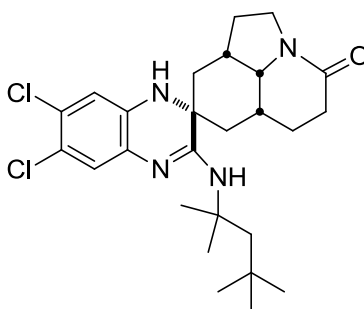

**6',7'-Dichloro-3'-((2,4,4-trimethylpentan-2-yl)amino)-1,2,5,6,6a,7,9,9a-octahydro-1'H-spiro[pyrrolo[3,2,1-ij]quinoline-8,2'-quinoxalin]-4(31H)-one 14{9}**. General procedure A afforded the spiroheterocycle **14{9}** (34 mg, 0.070 mmol, 30% yield) as an orange solid. IR (neat) 3483, 3286, 2949, 2874, 1630, 1608, 1580, 1515, 1481  $\text{cm}^{-1}$ ; HRMS (ESI)  $m/z$  calcd for  $\text{C}_{26}\text{H}_{37}\text{Cl}_2\text{N}_4\text{O}$  ( $[\text{M}+\text{H}]^+$ ) 491.2344, found 491.2330.

3: UV Detector: 214

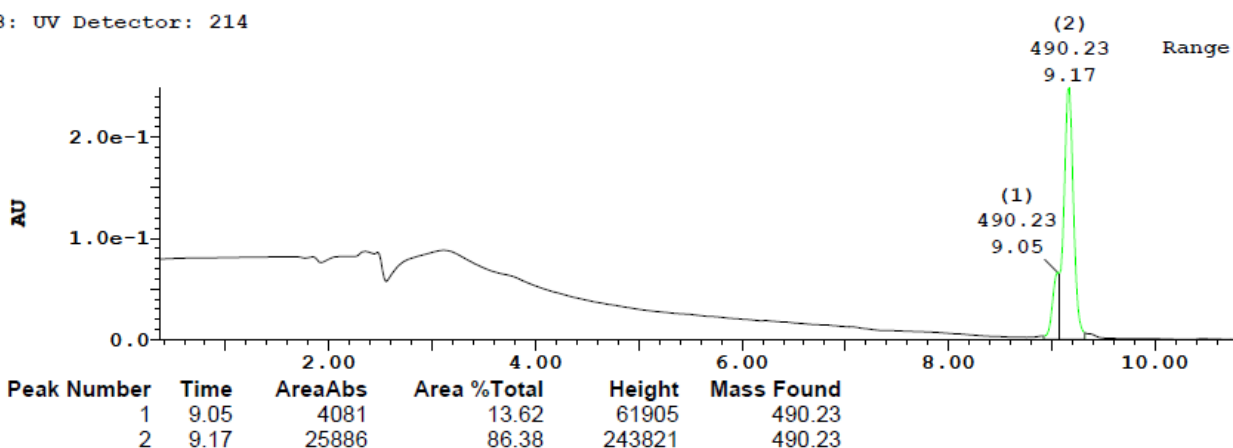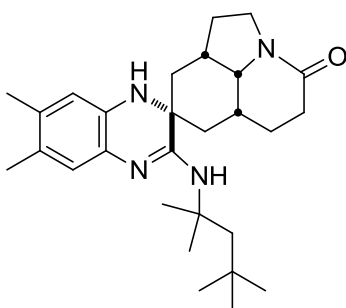

**6',7'-Dimethyl-3'-((2,4,4-trimethylpentan-2-yl)amino)-1,2,5,6,6a,7,9,9a-octahydro-1'H-spiro[pyrrolo[3,2,1-ij]quinoline-8,2'-quinoxalin]-4(31H)-one 14{10}**. General procedure A afforded the spiroheterocycle **14{10}** (42 mg, 0.093 mmol, 41% yield) as a tan solid. HRMS (ESI)  $m/z$  calcd for  $C_{28}H_{43}N_4O$  ( $[M+H]^+$ ) 451.3437, found 451.3433.

3: UV Detector: 214

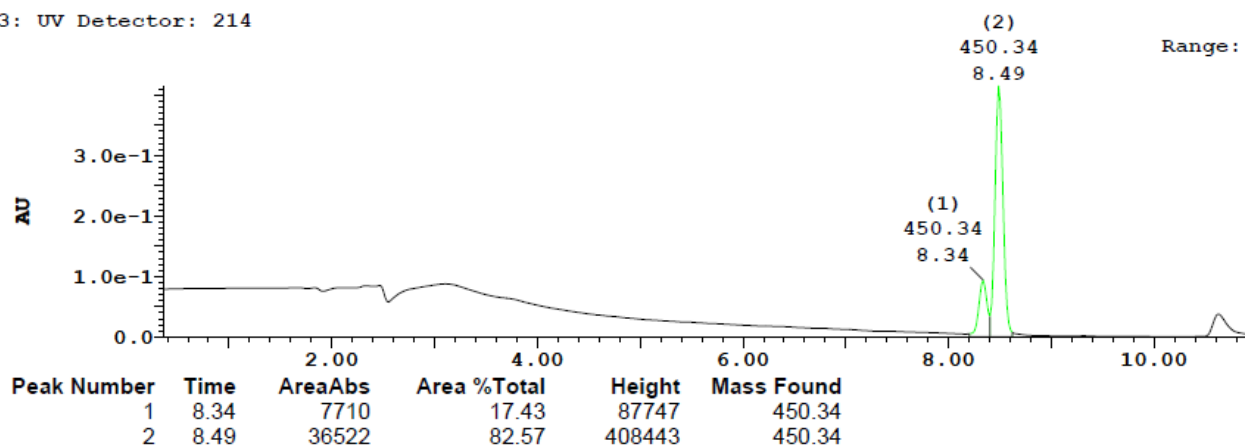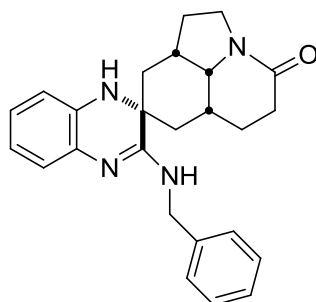

**3'-(Benzylamino)-1,2,5,6,6a,7,9,9a-octahydro-1'H-spiro[pyrrolo[3,2,1-ij]quinoline-8,2'-quinoxalin]-4(31H)-one 14{11}**. General procedure A afforded the spiroheterocycle **14{11}** (30 mg, 0.075 mmol, 33% yield) as a tan solid. HRMS (ESI)  $m/z$  calcd for  $C_{25}H_{29}N_4O$  ( $[M+H]^+$ ) 401.2341, found 401.2329.

3: UV Detector: 214

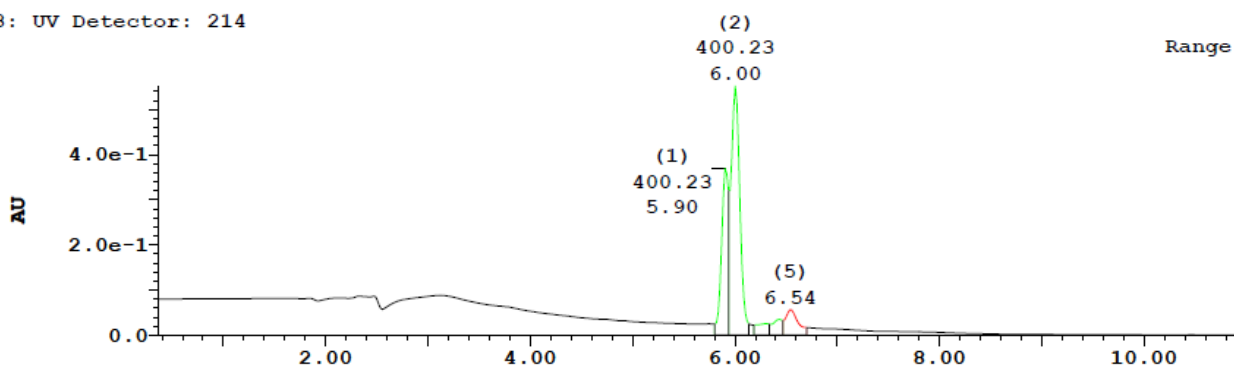

| Peak Number | Time | AreaAbs | Area %Total | Height | Mass Found |
|-------------|------|---------|-------------|--------|------------|
| 1           | 5.90 | 23326   | 28.71       | 343267 | 400.23     |
| 2           | 6.00 | 52254   | 64.31       | 527038 | 400.23     |
| 3           | 6.30 | 340     | 0.42        | 4123   | 400.23     |
| 4           | 6.44 | 1315    | 1.62        | 15299  | 400.23     |
| 5           | 6.54 | 4013    | 4.94        | 37384  | 400.23     |

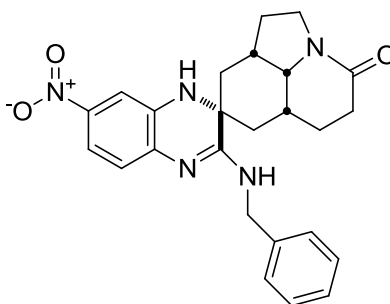

**3'-(Benzylamino)-7'-nitro-1,2,5,6,6a,7,9,9a-octahydro-1'H-spiro[pyrrolo[3,2,1-ij]quinoline-8,2'-quinoxalin]-4(31H)-one 14{12}**. General procedure A afforded the spiroheterocycle **14{12}** (53 mg, 0.12 mmol, 51% yield) as a red solid. HRMS (ESI)  $m/z$  calcd for  $C_{25}H_{28}N_5O_3$  ( $[M+H]^+$ ) 446.2192, found 446.2189.

3: UV Detector: 214

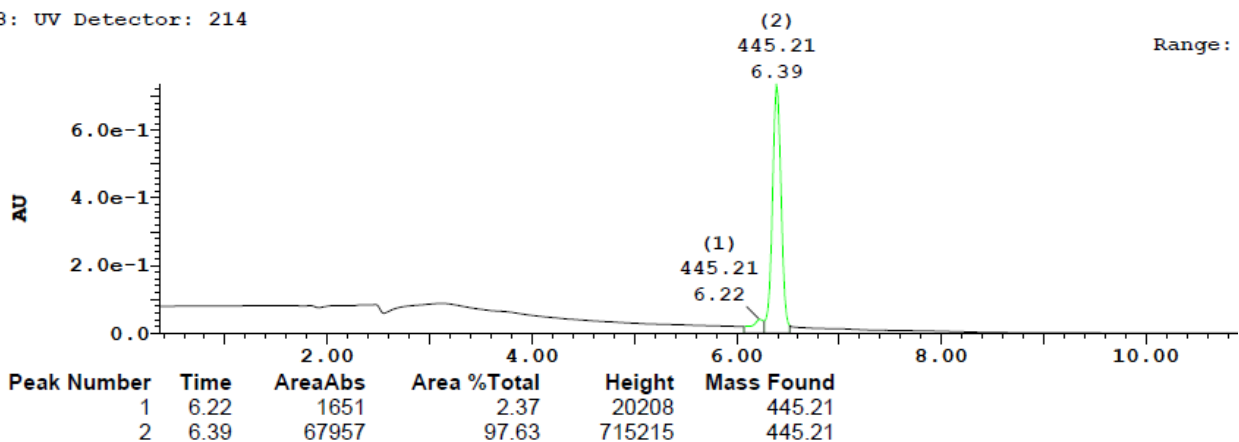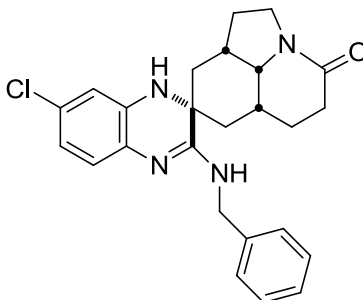

**7'-Chloro-1,2,5,6,6a,7,9,9a-octahydro-1'H-spiro[pyrrolo[3,2,1-ij]quinoline-8,2'-quinoxalin]-4(31H)-one 14{13}**. General procedure A afforded the spiroheterocycle **14{13}** (40 mg, 0.092 mmol, 40% yield) as a tan solid. HRMS (ESI)  $m/z$  calcd for  $C_{25}H_{28}ClN_4O$  ( $[M+H]^+$ ) 435.1960, found 435.1960.

3: UV Detector: 214

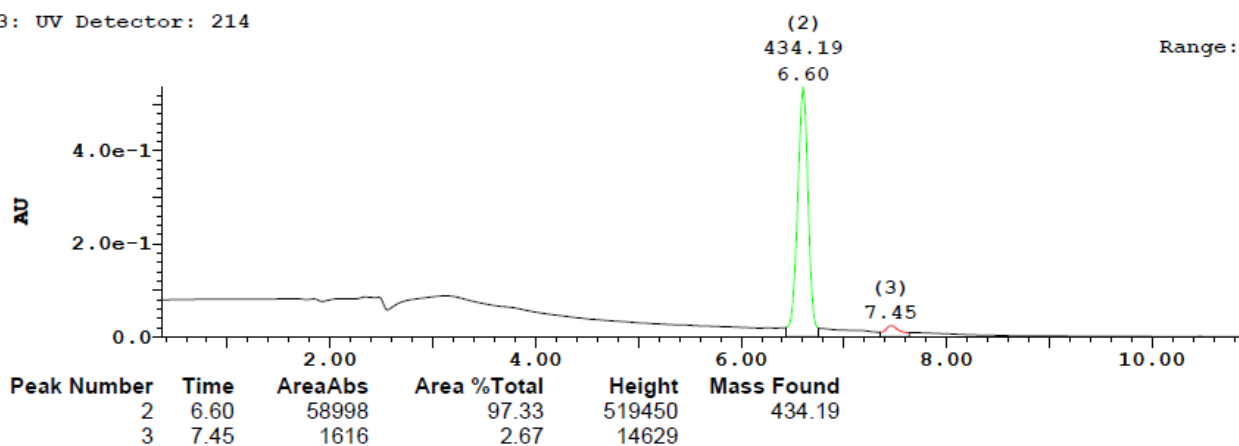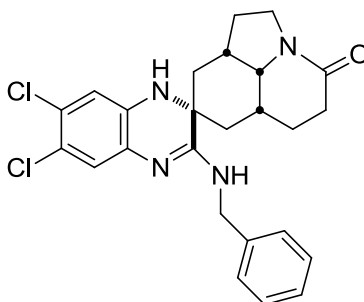

**3'-(Benzylamino)-6',7'-dichloro-1,2,5,6,6a,7,9,9a-octahydro-1'H-spiro[pyrrolo[3,2,1-ij]quinoline-8,2'-quinoxalin]-4(31H)-one 14{14}**. General procedure A afforded the spiroheterocycle **14{14}** (34 mg, 0.073 mmol, 32% yield) as a brown solid. HRMS (ESI)  $m/z$  calcd for  $C_{25}H_{27}Cl_2N_4O$  ( $[M+H]^+$ ) 469.1562, found 469.1568.

3: UV Detector: 214

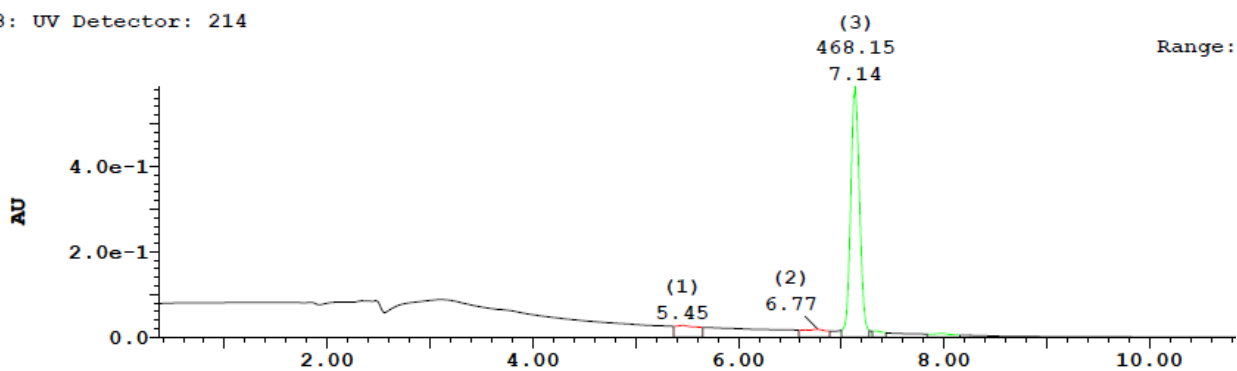

| Peak Number | Time | AreaAbs | Area %Total | Height | Mass Found |
|-------------|------|---------|-------------|--------|------------|
| 1           | 5.45 | 314     | 0.56        | 3014   |            |
| 2           | 6.77 | 445     | 0.79        | 3568   |            |
| 3           | 7.14 | 54970   | 97.91       | 571200 | 468.15     |
| 4           | 7.34 | 106     | 0.19        | 1391   | 468.15     |
| 5           | 7.97 | 308     | 0.55        | 2704   | 468.15     |

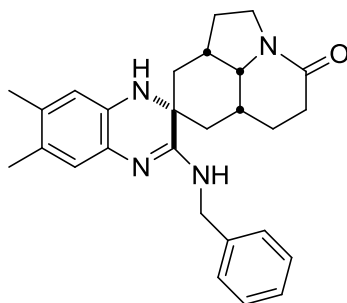

**3'-(Benzylamino)-6',7'-dimethyl-1,2,5,6,6a,7,9,9a-octahydro-1'H-spiro[pyrrolo[3,2,1-ij]quinoline-8,2'-quinoxalin]-4(31H)-one 14{15}**. General procedure A afforded the spiroheterocycle **14{15}** (53 mg, 0.12 mmol, 54% yield) as a yellow solid. HRMS (ESI)  $m/z$  calcd for  $C_{27}H_{33}N_4O$  ( $[M+H]^+$ ) 429.2654, found 429.2643.



3: UV Detector: 214

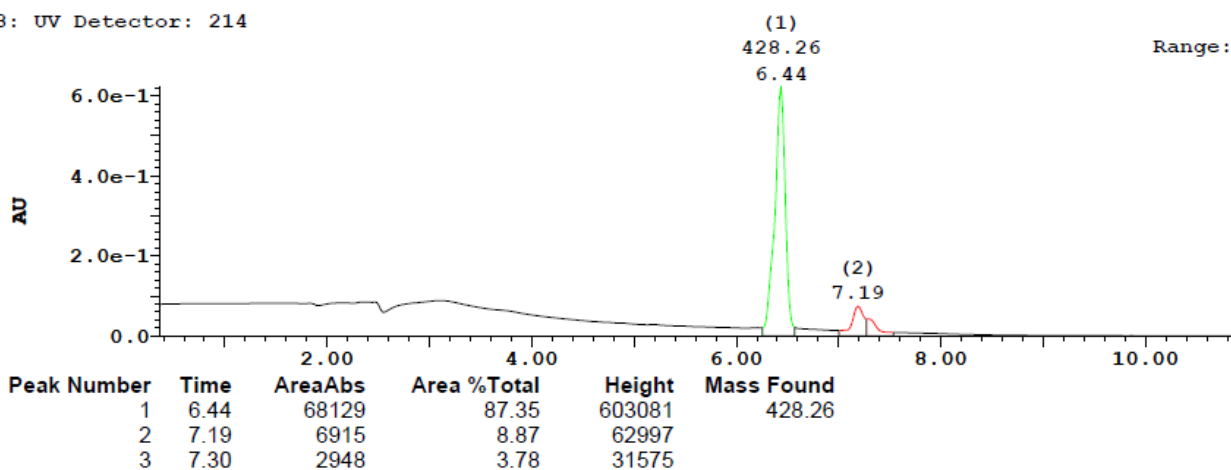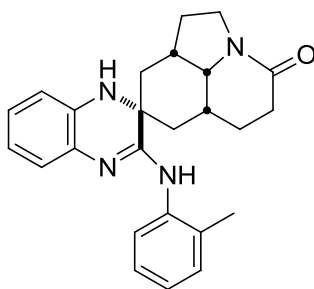

**3'-(o-Tolylamino)-1,2,5,6,6a,7,9,9a-octahydro-1'H-spiro[pyrrolo[3,2,1-ij]quinoline-8,2'-quinoxalin]-4(31H)-one 14{16}**. General procedure A afforded the spiroheterocycle **14{16}** (27 mg, 0.067 mmol, 29% yield) as a tan solid. Mp > 260 °C;  $^1\text{H}$  NMR  $\delta$  0.91 (t,  $J = 13.2$  Hz, 1 H), 1.19 (t,  $J = 13.2$  Hz, 1 H), 1.65 (m, 1 H), 1.76 (m, 1 H), 1.96 (m, 2 H), 2.16 (s, 3 H), 2.19 (m, 1 H), 2.36 (m, 2 H), 2.89 (m, 1 H), 3.12 (m, 1 H), 3.51 (t,  $J = 10.4$  Hz, 1 H), 3.64 (m, 2 H), 3.76 (m, 1 H), 6.47 (m, 1 H), 6.49 (m, 1 H), 6.69 (m, 2 H), 6.81 (m, 2 H), 7.02 (dt,  $J = 1.2, 7.4$  Hz, 1 H), 7.20 (t,  $J = 7.6$  Hz, 1 H), 7.24 (br s, 1 H);  $^{13}\text{C}$  NMR  $\delta$  d 18.1, 29.1, 37.0, 59.7, 113.7, 114.9, 119.5, 120.6, 122.4, 123.4, 127.1, 131.1; u 25.5, 27.1, 27.9, 33.0, 35.3, 42.9, 55.2, 126.6, 129.5, 132.3, 146.3, 150.6, 169.0; IR (neat): 3319, 3270, 2942, 2874, 1659, 1601  $\text{cm}^{-1}$ ; HRMS (ESI)  $m/z$  calcd for  $\text{C}_{25}\text{H}_{29}\text{N}_4\text{O}$  ( $[\text{M}+\text{H}]^+$ ) 401.2341, found 401.2334.

3: UV Detector: 214

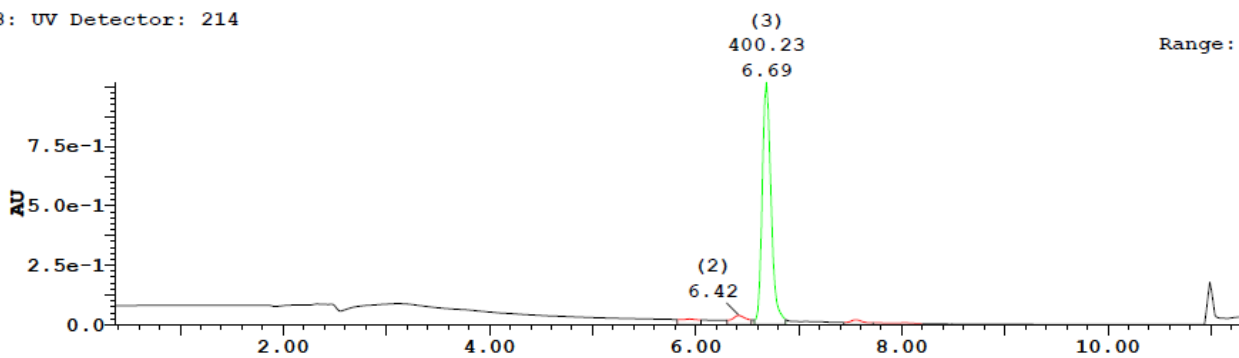

| Peak Number | Time | AreaAbs | Area %Total | Height | Mass Found |
|-------------|------|---------|-------------|--------|------------|
| 1           | 5.94 | 265     | 0.27        | 2966   |            |
| 2           | 6.42 | 1957    | 1.96        | 19188  |            |
| 3           | 6.69 | 95769   | 95.93       | 998145 | 400.23     |
| 4           | 7.55 | 1371    | 1.37        | 12318  |            |
| 5           | 8.04 | 467     | 0.47        | 2555   |            |

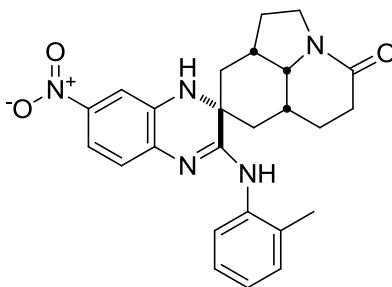

**7'-Nitro-3'-(o-tolylamino)-1,2,5,6,6a,7,9,9a-octahydro-1'H-spiro[pyrrolo[3,2,1-ij]quinoline-8,2'-quinoxalin]-4(31H)-one 14{17}**. General procedure A afforded the spiroheterocycle **14{17}** (8 mg, 0.019 mmol, 8% yield) as a red-brown solid. HRMS (ESI)  $m/z$  calcd for  $C_{25}H_{28}N_5O_3$  ( $[M+H]^+$ ) 446.2192, found 446.2187.

3: UV Detector: 214

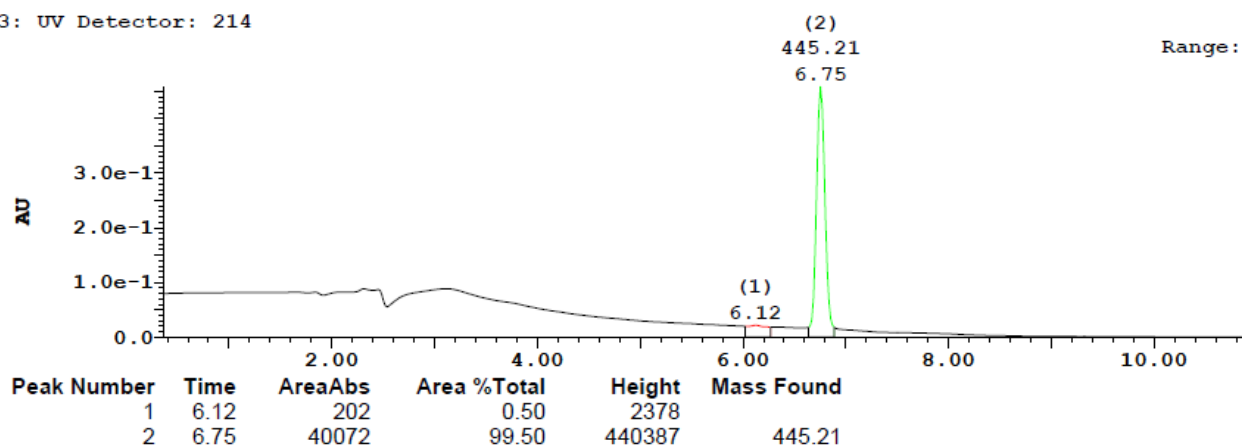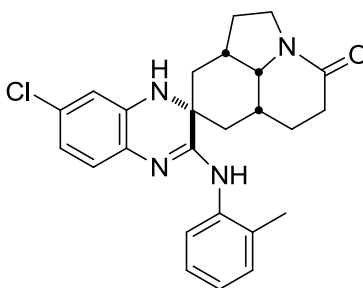

**7'-Chloro-3'-(o-tolylamino)-1,2,5,6,6a,7,9,9a-octahydro-1'H-spiro[pyrrolo[3,2,1-ij]quinoline-8,2'-quinoxalin]-4(31H)-one **14**{**18**}**. General procedure A afforded the spiroheterocycle **14**{**18**} (6 mg, 0.014 mmol, 6% yield) as a tan solid. Mp > 260 °C;  $^1\text{H}$  NMR ( $\text{CDCl}_3$ )  $\delta$  0.90 (dt,  $J = 3.6, 12.8$  Hz, 1 H), 1.19 (dt,  $J = 3.6, 13.2$  Hz, 1 H), 1.65 (m, 1 H), 1.77 (m, 1 H), 1.85 (m, 1 H), 1.95 (m, 1 H), 2.15 (s, 3 H), 2.25-2.44 (m, 2 H), 2.88 (m, 1 H), 3.10 (m, 1 H), 3.51 (t,  $J = 10.4$  Hz, 1 H), 3.65 (m, 2 H), 6.39 (d,  $J = 8.8$  Hz, 1 H), 6.46 (s, 1 H), 6.50 (d,  $J = 2.0$  Hz, 1 H), 6.63 (m, 1 H), 6.78 (m, 1 H), 7.03 (t,  $J = 7.2$  Hz, 1 H), 7.20 (t,  $J = 7.2$  Hz, 1 H), 7.24 (s, 1 H);  $^{13}\text{C}$  NMR  $\delta$  d 18.2, 29.1, 37.0, 40.1, 59.7, 114.5, 114.7, 119.3, 120.5, 123.6, 127.2, 131.3; u 25.5, 27.1, 27.9, 33.1, 35.6, 43.0, 55.3, 129.5, 130.9, 133.5, 145.9, 146.2, 150.2, 169.1; IR 3300, 3268, 2940, 1656, 1596, 1505  $\text{cm}^{-1}$ ; HRMS (ESI)  $m/z$  calcd for  $\text{C}_{25}\text{H}_{28}\text{ClN}_4\text{O}$  ( $[\text{M}+\text{H}]^+$ ) 435.1960, found 435.1948.

3: UV Detector: 214

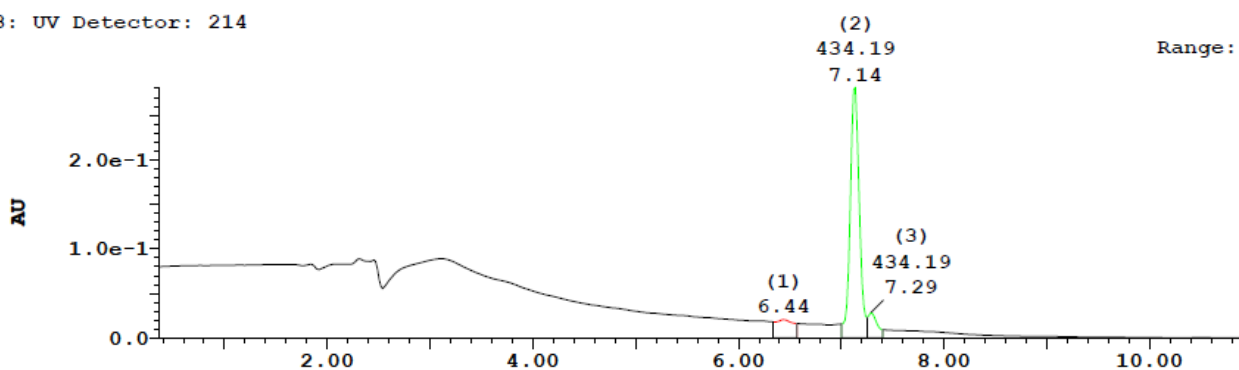

| Peak Number | Time | AreaAbs | Area %Total | Height | Mass Found |
|-------------|------|---------|-------------|--------|------------|
| 1           | 6.44 | 306     | 1.12        | 3333   |            |
| 2           | 7.14 | 25654   | 93.88       | 267679 | 434.19     |
| 3           | 7.29 | 1367    | 5.00        | 16726  | 434.19     |

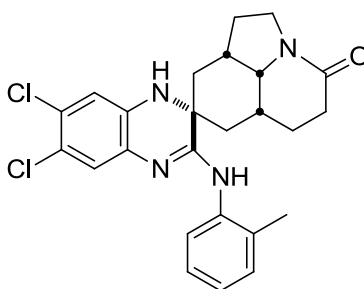

**6',7'-Dichloro-3'-(o-tolylamino)-1,2,5,6,6a,7,9,9a-octahydro-1'H-spiro[pyrrolo[3,2,1-ij]quinoline-8,2'-quinoxalin]-4(31H)-one 14{19}**. General procedure A afforded the spiroheterocycle **14{19}** (8 mg, 0.017 mmol, 7% yield) as a brown solid. HRMS (ESI)  $m/z$  calcd for  $C_{25}H_{27}Cl_2N_4O$  ( $[M+H]^+$ ) 469.1562, found 469.1570.

3: UV Detector: 214

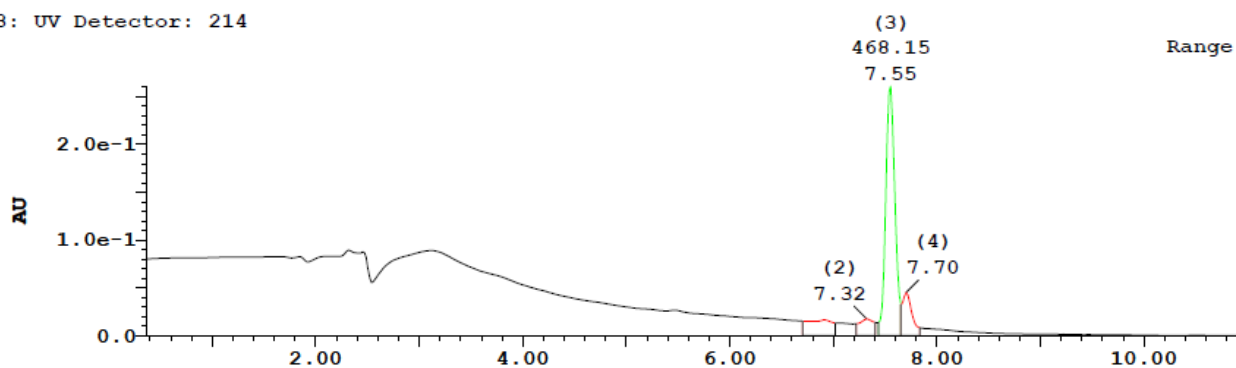

| Peak Number | Time | AreaAbs | Area %Total | Height | Mass Found |
|-------------|------|---------|-------------|--------|------------|
| 1           | 6.92 | 295     | 1.05        | 2690   |            |
| 2           | 7.32 | 369     | 1.31        | 4238   |            |
| 3           | 7.55 | 24225   | 86.28       | 248995 | 468.15     |
| 4           | 7.70 | 3188    | 11.36       | 34939  |            |

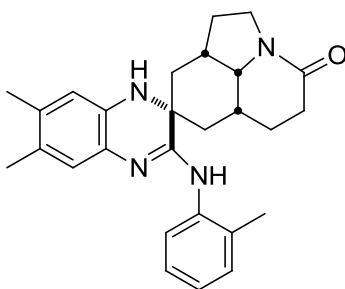

**6',7'-Dimethyl-3'-(o-tolylamino)-1,2,5,6,6a,7,9,9a-octahydro-1'H-spiro[pyrrolo[3,2,1-ij]quinoline-8,2'-quinoxalin]-4(31H)-one 14{20}**. General procedure A afforded the spiroheterocycle **14{20}** (34 mg, 0.080 mmol, 35% yield) as a tan solid. Mp > 260 °C;  $^1\text{H}$  NMR  $\delta$  0.87 (t,  $J = 12.0$  Hz, 1 H), 1.15 (t,  $J = 13.2$  Hz, 1 H), 1.64 (dd,  $J = 6.8, 13.2$  Hz, 1 H), 1.75 (m, 1 H), 1.90-2.01 (m, 3 H), 2.09 (s, 3 H), 2.14 (s, 3 H), 2.15 (s, 3 H), 2.18 (m, 2 H), 2.32 (m, 2 H), 2.87 (td,  $J = 3.6, 12.8$  Hz, 1 H), 3.12 (m, 1 H), 3.50 (m, 1 H), 3.63 (m, 1 H), 6.28 (s, 1 H), 6.38 (s, 1 H), 6.48 (s, 1 H), 6.80 (dd,  $J = 1.2, 7.6$  Hz, 1 H), 7.00 (dt,  $J = 1.2, 7.6$  Hz, 1 H), 7.18 (dt,  $J = 1.6, 8.0$  Hz, 1 H), 7.23 (d,  $J = 7.2$  Hz, 1 H);  $^{13}\text{C}$  NMR  $\delta$  d 18.1, 18.9, 19.2, 29.1, 37.0, 59.8, 115.0, 116.3, 120.6, 123.3, 127.0, 131.1; u 25.5, 27.1, 27.9, 32.9, 35.3, 42.9, 55.2,

124.5, 127.6, 129.4, 129.9, 130.3, 146.5, 150.8, 169.1; IR (neat): 3385, 3289, 2935, 2874, 1646, 1620, 1518  $\text{cm}^{-1}$ ; HRMS (ESI)  $m/z$  calcd for  $\text{C}_{27}\text{H}_{33}\text{N}_4\text{O}$  ( $[\text{M}+\text{H}]^+$ ) 429.2654, found 429.2654.

ID CMC-34-157-D5 File KF090408L20 Date 04-Sep-2008 Time 15:53:46 Description MDF009401

3: UV Detector: 214

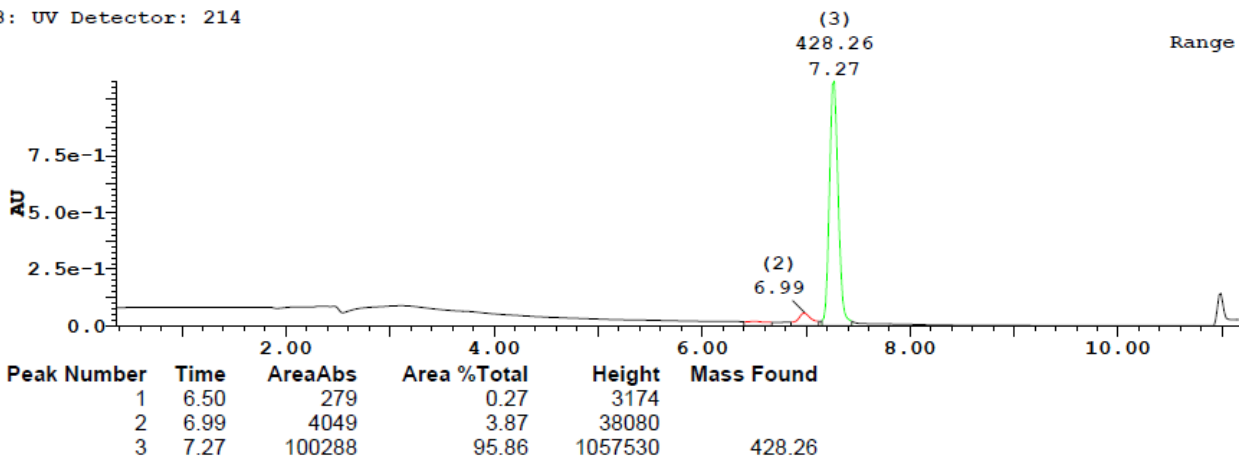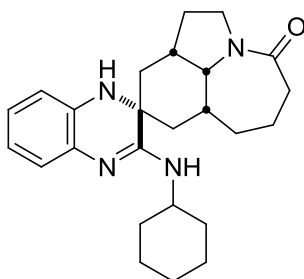

**3'-(Cyclohexylamino)-31,5,6,7,7a,8,10,10a-octahydro-1H,1'H-spiro[azepino[3,2,1-hi]indole-9,2'-quinoxalin]-4(2H)-one 14{21}**. General procedure B afforded the spiroheterocycle **14{21}** (24 mg, 0.06 mmol, 17% yield) as a tan solid. HRMS (ESI)  $m/z$  calcd for  $\text{C}_{25}\text{H}_{35}\text{N}_4\text{O}$  ( $[\text{M}+\text{H}]^+$ ) 407.2811, found 407.2828.

3: UV Detector: 214

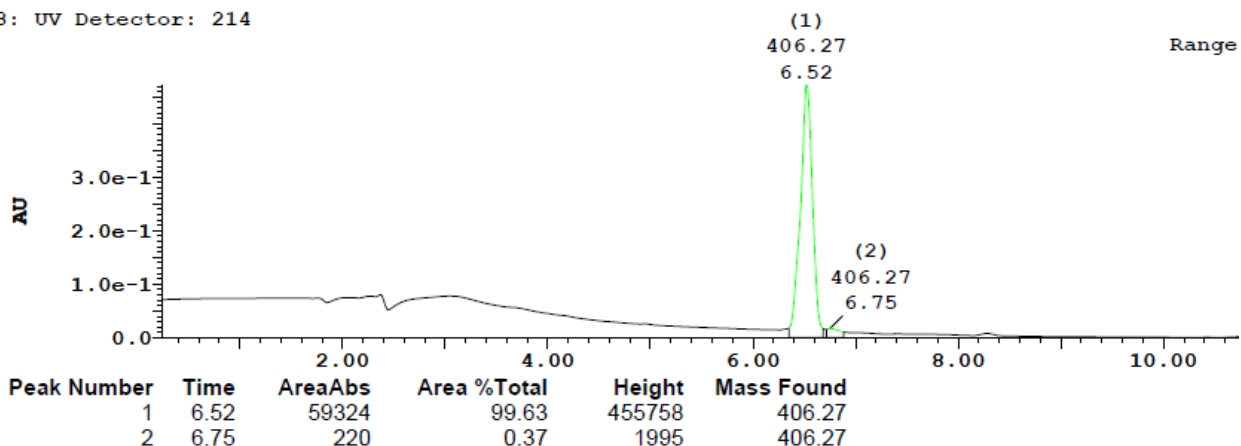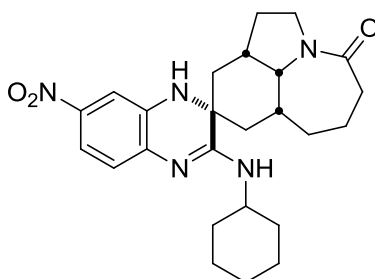

**3'-(Cyclohexylamino)-7'-nitro-31,5,6,7,7a,8,10,10a-octahydro-1H,1'H-spiro[azepino[3,2,1-hi]indole-9,2'-quinoxalin]-4(2H)-one 14{22}**. General procedure B afforded the spiroheterocycle **14{22}** (69 mg, 0.15 mmol, 45% yield) as a red solid. HRMS (ESI)  $m/z$  calcd for  $C_{25}H_{34}N_5O_3$  ( $[M+H]^+$ ) 452.2662, found 452.2667.

3: UV Detector: 214

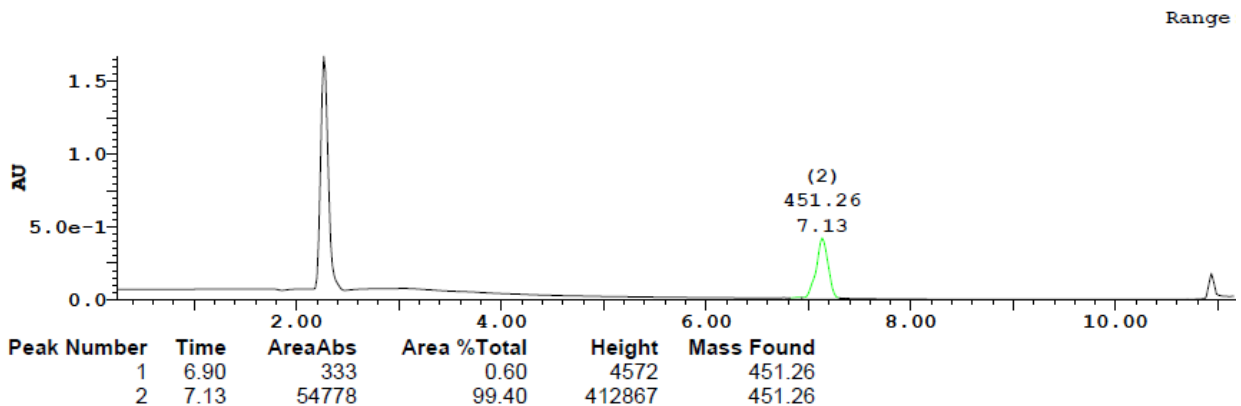

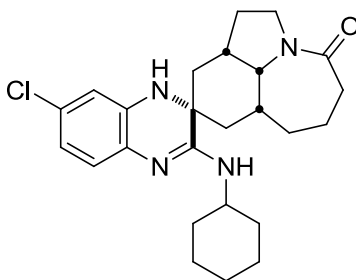

**7'-Chloro-3'-(cyclohexylamino)-31,5,6,7,7a,8,10,10a-octahydro-1H,1'H-spiro[azepino[3,2,1-hi]indole-9,2'-quinoxalin]-4(2H)-one 14{23}**. General procedure B afforded the spiroheterocycle **14{23}** (74 mg, 0.17 mmol, 50% yield) as a tan solid. HRMS (ESI)  $m/z$  calcd for  $C_{25}H_{34}ClN_4O$  ( $[M+H]^+$ ) 441.2421, found 441.2435.

ID CMC-34-076-A3 File KF071008L03 Date 10-Jul-2008 Time 22:13:36 Description MDF008641

3: UV Detector: 214

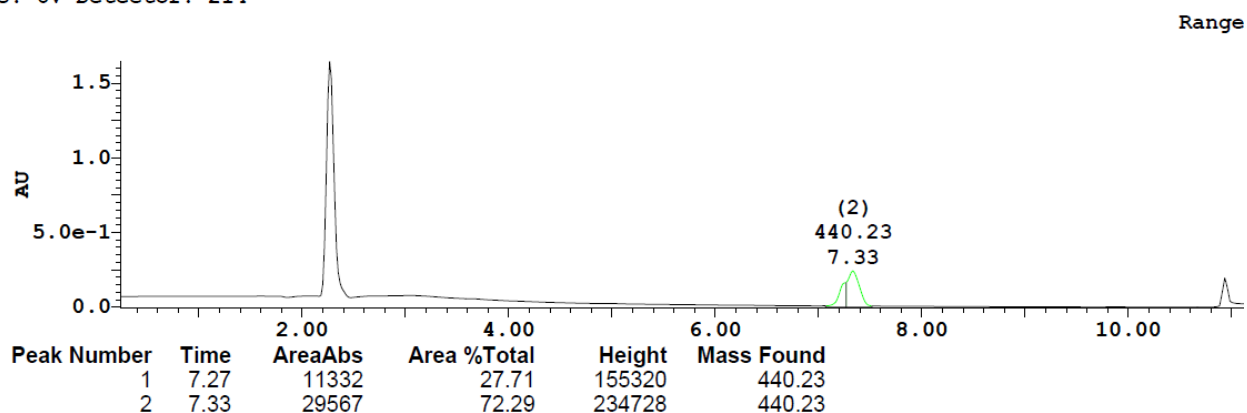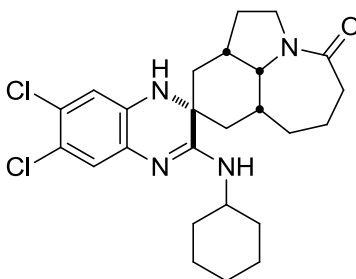

**6',7'-Dichloro-3'-(cyclohexylamino)-31,5,6,7,7a,8,10,10a-octahydro-1H,1'H-spiro[azepino[3,2,1-hi]indole-9,2'-quinoxalin]-4(2H)-one 14{24}**. General procedure B



afforded the spiroheterocycle **14{24}** (24 mg, 0.051 mmol, 15% yield) as a tan solid. HRMS (ESI)  $m/z$  calcd for  $C_{25}H_{33}Cl_2N_4O$  ( $[M+H]^+$ ) 475.2031, found 475.2031.

ID CMC-34-076-A4 File KF071008L04 Date 10-Jul-2008 Time 22:25:55 Description MDF008643

3: UV Detector: 214

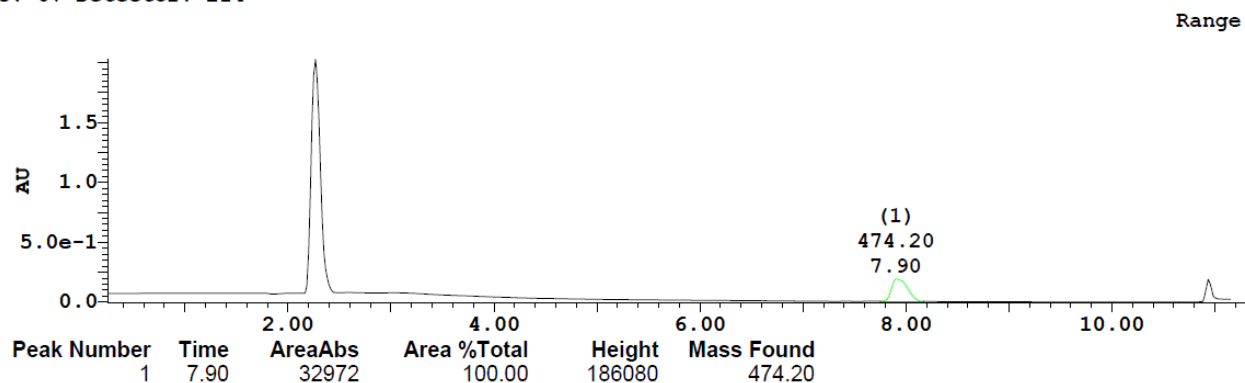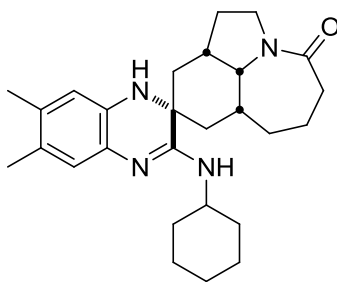

**3'-(Cyclohexylamino)-6',7'-dimethyl-31,5,6,7,7a,8,10,10a-octahydro-1H,1'H-spiro[azepino[3,2,1-hi]indole-9,2'-quinoxalin]-4(2H)-one 14{25}**. General procedure B afforded the spiroheterocycle **14{25}** (58 mg, 0.13 mmol, 40% yield) as a tan solid. HRMS (ESI)  $m/z$  calcd for  $C_{27}H_{39}N_4O$  ( $[M+H]^+$ ) 435.3124, found 435.3137.

3: UV Detector: 214

Range:

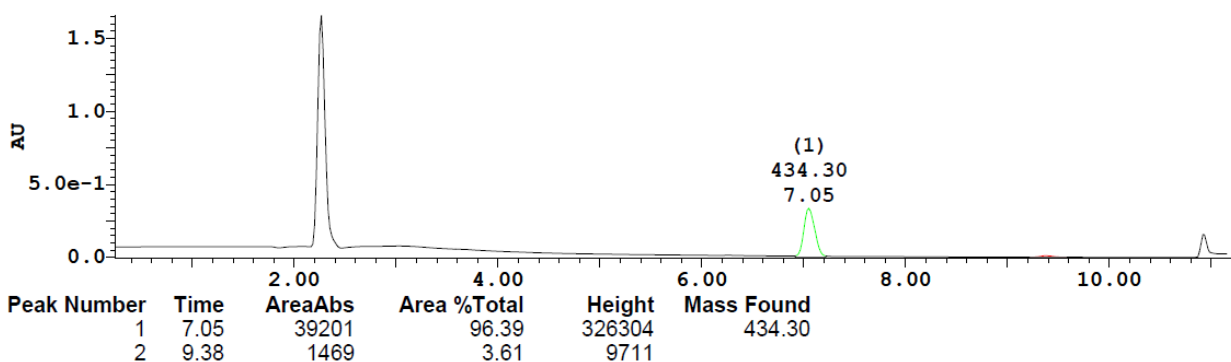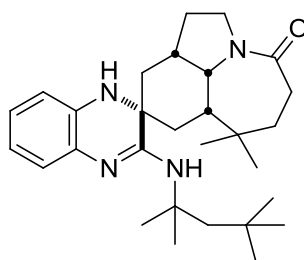

**7,7-Dimethyl-3'-((2,4,4-trimethylpentan-2-yl)amino)-31,5,6,7,7a,8,10,10a-octahydro-1H,1'H-spiro[azepino[3,2,1-hi]indole-9,2'-quinoxalin]-4(2H)-one 14{26}**. General procedure B afforded the spiroheterocycle **14{26}** (66 mg, 0.14 mmol, 42% yield) as a tan solid. HRMS (ESI)  $m/z$  calcd for  $C_{27}H_{41}N_4O$  ( $[M+H]^+$ ) 437.3280, found 437.3290.

3: UV Detector: 214

Range:

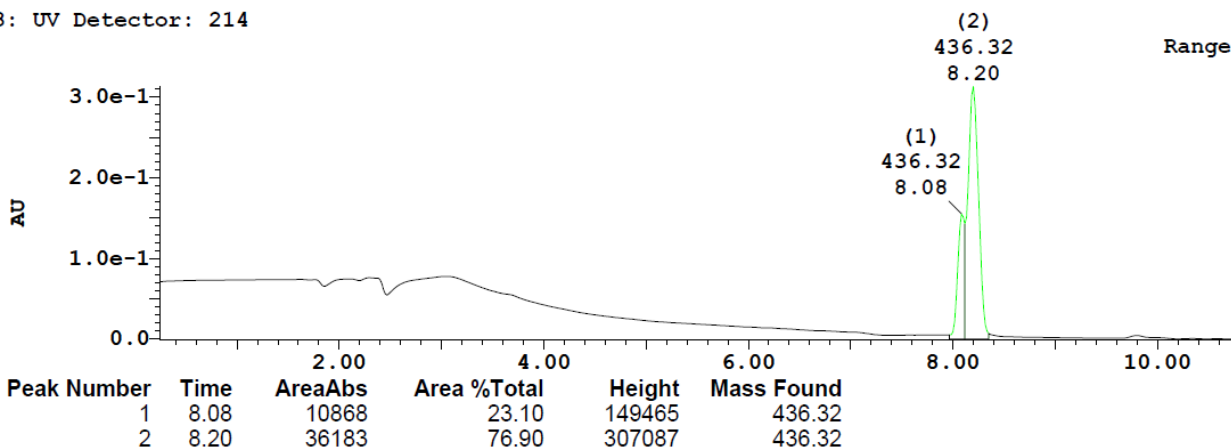

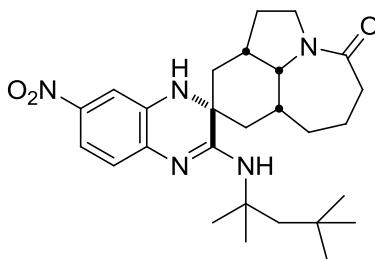

**7'-Nitro-3'-((2,4,4-trimethylpentan-2-yl)amino)-31,5,6,7,7a,8,10,10a-octahydro-1H,1'H-spiro[azepino[3,2,1-hi]indole-9,2'-quinoxalin]-4(2H)-one 14{27}**. General procedure B afforded the spiroheterocycle **14{27}** (71 mg, 0.15 mmol, 44% yield) as a red solid. HRMS (ESI)  $m/z$  calcd for  $C_{27}H_{40}N_5O_3$  ( $[M+H]^+$ ) 482.3131, found 482.3124.

ID CMC-34-076-B2 File KF071008L07 Date 10-Jul-2008 Time 23:02:53 Description MDF008652

3: UV Detector: 214

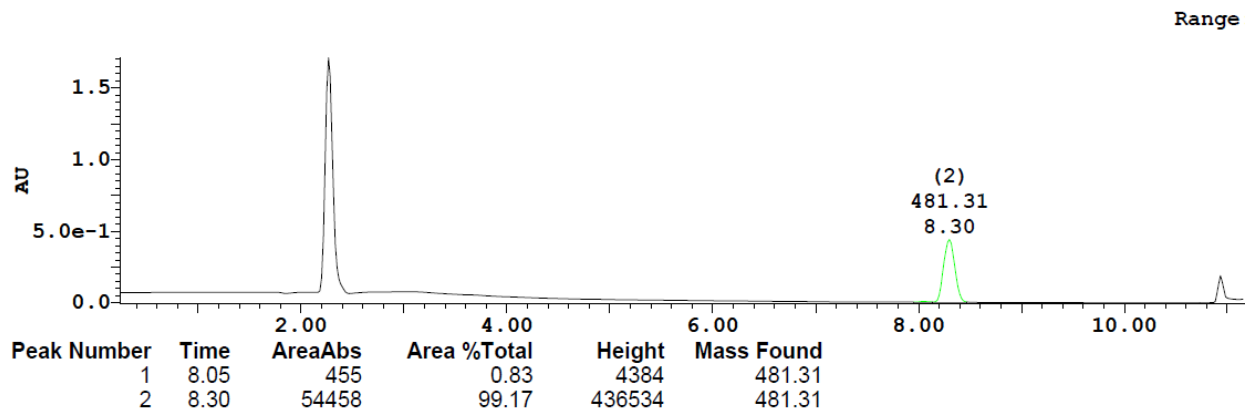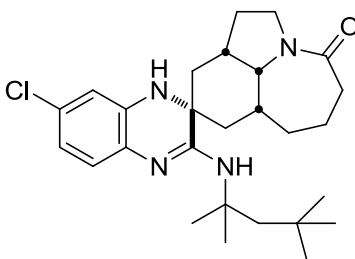

**7'-Chloro-3'-((2,4,4-trimethylpentan-2-yl)amino)-31,5,6,7,7a,8,10,10a-octahydro-1H,1'H-spiro[azepino[3,2,1-hi]indole-9,2'-quinoxalin]-4(2H)-one 14{28}**. General procedure B

afforded the spiroheterocycle **14{28}** (95 mg, 0.20 mmol, 60% yield) as a yellow solid. HRMS (ESI)  $m/z$  calcd for  $C_{27}H_{40}ClN_4O$  ( $[M+H]^+$ ) 471.2891, found 471.2900.

ID CMC-34-076-B3 File KF071008L08 Date 10-Jul-2008 Time 23:15:12 Description MDF008655

3: UV Detector: 214

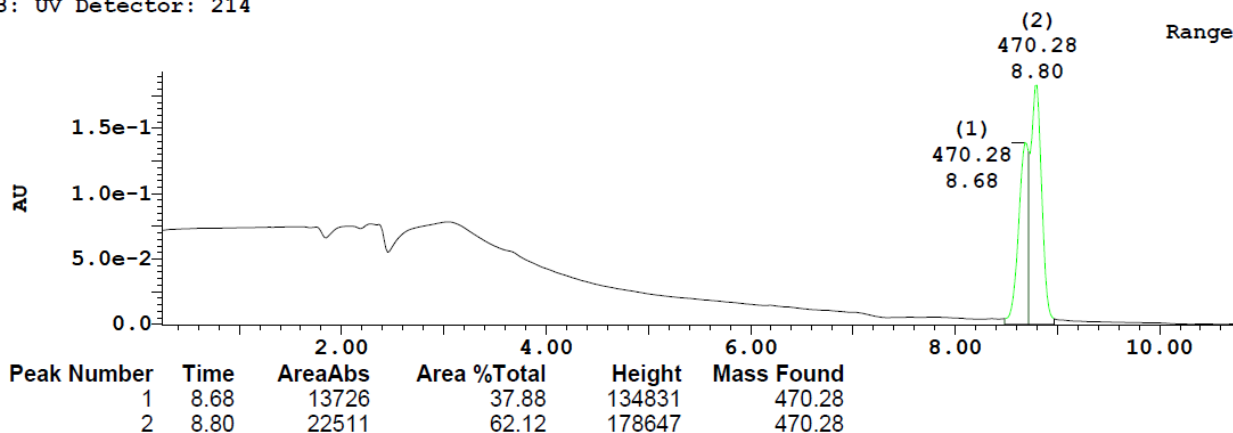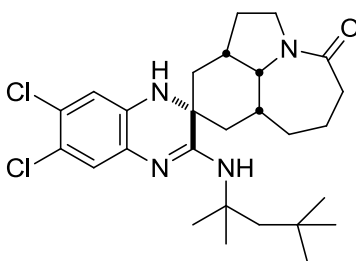

**6',7'-Dichloro-3'-((2,4,4-trimethylpentan-2-yl)amino)-31,5,6,7,7a,8,10,10a-octahydro-1H,1'H-spiro[azepino[3,2,1-hi]indole-9,2'-quinoxalin]-4(2H)-one **14{29}****. General procedure B afforded the spiroheterocycle **14{29}** (78 mg, 0.15 mmol, 46% yield) as a light brown solid. HRMS (ESI)  $m/z$  calcd for  $C_{27}H_{39}Cl_2N_4O$  ( $[M+H]^+$ ) 505.2501, found 505.2503.

3: UV Detector: 214

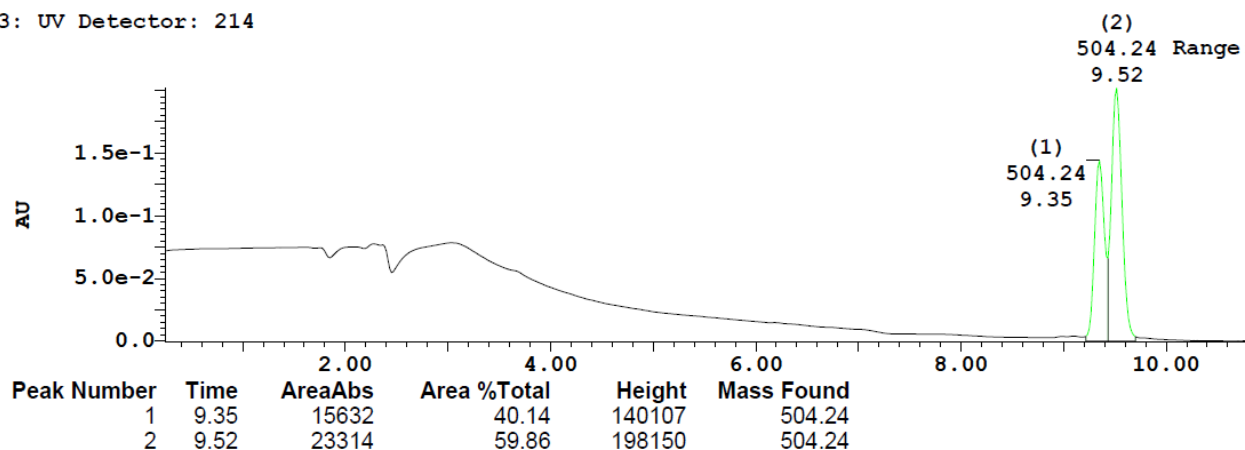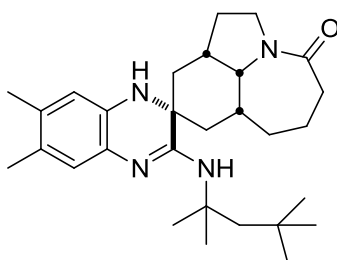

**6',7'-Dimethyl-3'-((2,4,4-trimethylpentan-2-yl)amino)-31,5,6,7,7a,8,10,10a-octahydro-1H,1'H-spiro[azepino[3,2,1-hi]indole-9,2'-quinoxalin]-4(2H)-one 14{30}**. General procedure B afforded the spiroheterocycle **14{30}** (96 mg, 0.21 mmol, 61% yield) as a tan solid. HRMS (ESI)  $m/z$  calcd for  $C_{29}H_{45}N_4O$  ( $[M+H]^+$ ) 465.3593, found 465.3615.

3: UV Detector: 214

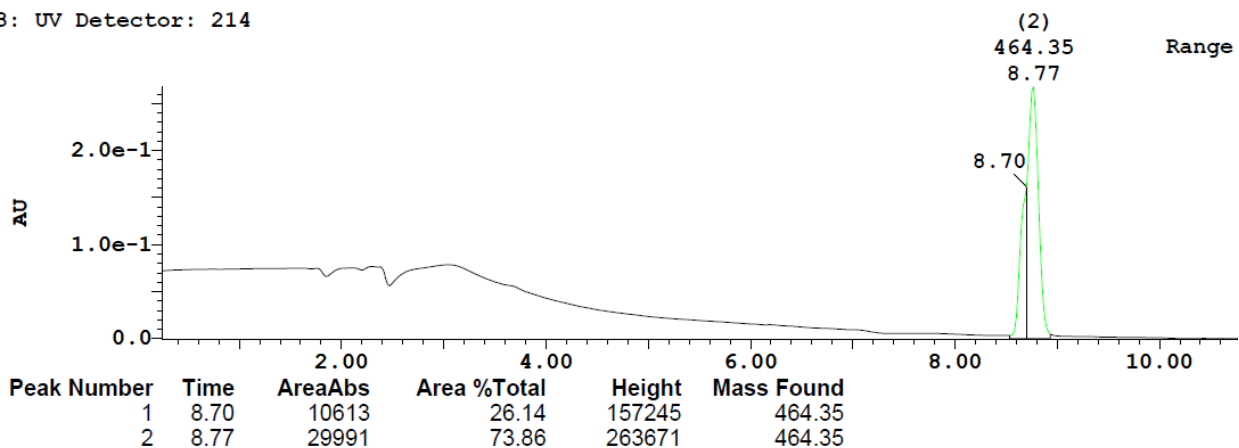

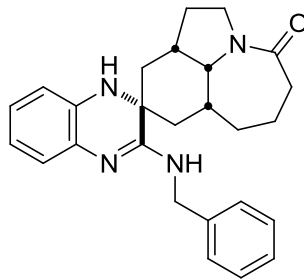

**3'-(Benzylamino)-31,5,6,7,7a,8,10,10a-octahydro-1H,1'H-spiro[azepino[3,2,1-hi]indole-9,2'-quinoxalin]-4(2H)-one 14{3I}**. General procedure B afforded the spiroheterocycle **14{3I}** (56 mg, 0.135 mmol, 40% yield) as a tan solid. HRMS (ESI)  $m/z$  calcd for  $C_{26}H_{31}N_4O$  ( $[M+H]^+$ ) 415.2498, found 415.2512.

ID CMC-34-076-C1 File KF071008L11 Date 10-Jul-2008 Time 23:52:10 Description MDF008664

3: UV Detector: 214

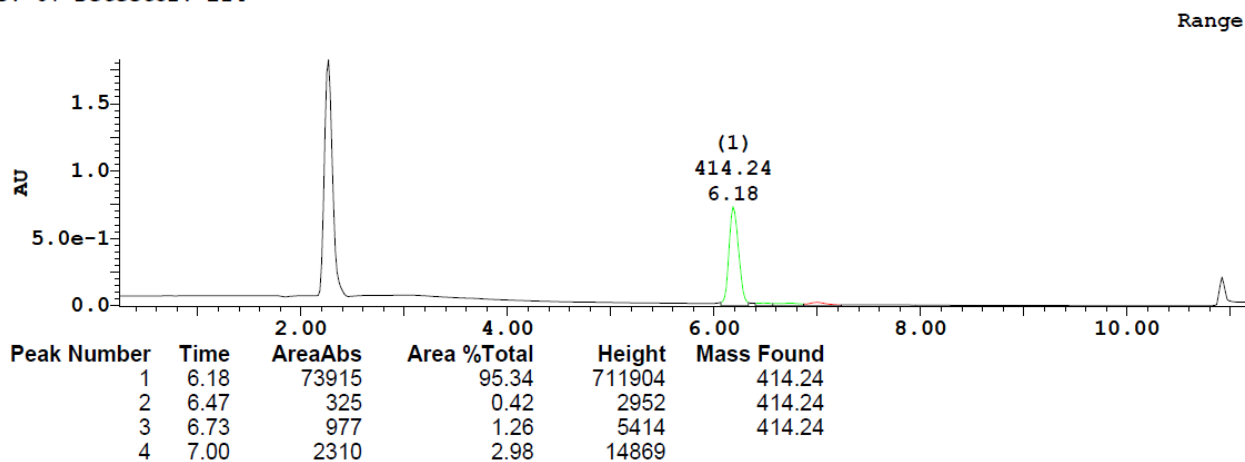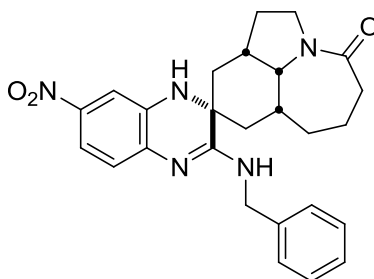

**3'-(Benzylamino)-7'-nitro-31,5,6,7,7a,8,10,10a-octahydro-1H,1'H-spiro[azepino[3,2,1-hi]indole-9,2'-quinoxalin]-4(2H)-one 14{32}**. General procedure B afforded the spiroheterocycle **14{32}** (42 mg, 0.092 mmol, 27% yield) as a reddish brown solid. HRMS (ESI)  $m/z$  calcd for  $C_{26}H_{30}N_5O_3$  ( $[M+H]^+$ ) 460.2349, found 460.2378.

ID CMC-34-076-C2 File KF071008L12 Date 11-Jul-2008 Time 00:04:30 Description MDF008667

3: UV Detector: 214

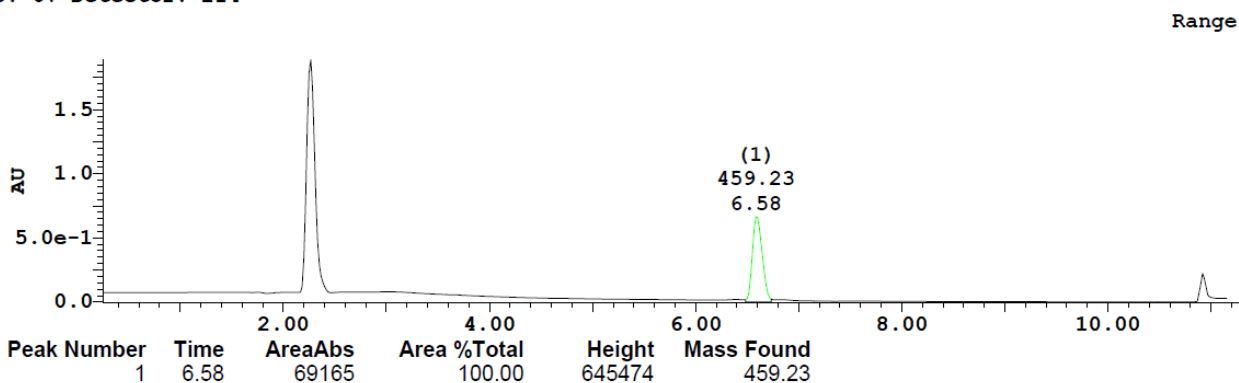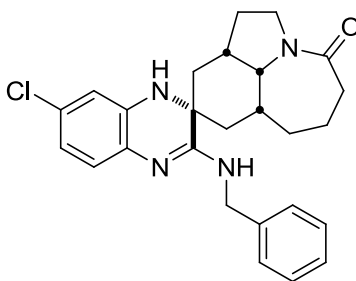

**3'-(Benzylamino)-7'-chloro-31,5,6,7,7a,8,10,10a-octahydro-1H,1'H-spiro[azepino[3,2,1-hi]indole-9,2'-quinoxalin]-4(2H)-one 14{33}**. General procedure B afforded the spiroheterocycle **14{33}** (84 mg, 0.188 mmol, 55% yield) as a tan solid. HRMS (ESI)  $m/z$  calcd for  $C_{26}H_{30}ClN_4O$  ( $[M+H]^+$ ) 449.2108, found 449.2095.

3: UV Detector: 214

Range:

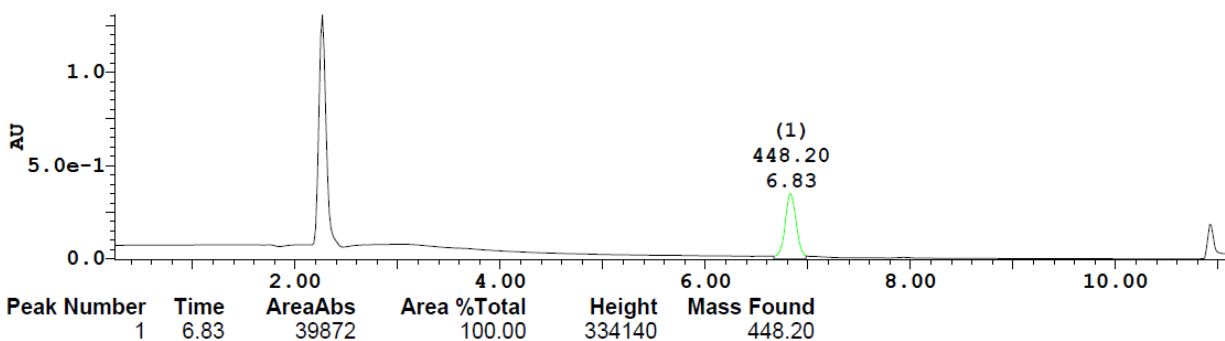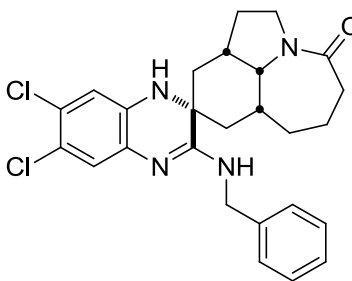

**3'-(Benzylamino)-6',7'-dichloro-31,5,6,7,7a,8,10,10a-octahydro-1H,1'H-spiro[azepino[3,2,1-hi]indole-9,2'-quinoxalin]-4(2H)-one 14{34}**. General procedure B afforded the spiroheterocycle **14{34}** (46 mg, 0.096 mmol, 28% yield) as a tan solid. HRMS (ESI)  $m/z$  calcd for  $C_{26}H_{29}Cl_2N_4O$  ( $[M+H]^+$ ) 483.1718, found 483.1729.

3: UV Detector: 214

Range:

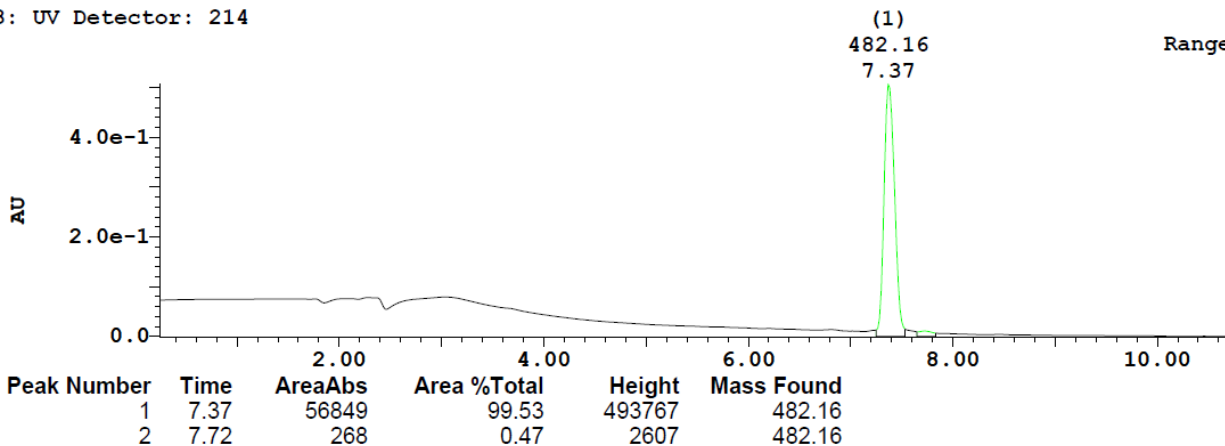



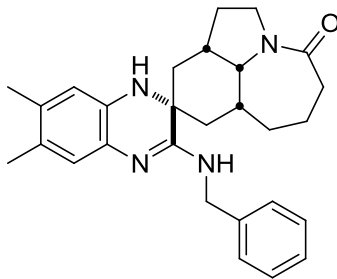

**3'-(Benzylamino)-6',7'-dimethyl-31,5,6,7,7a,8,10,10a-octahydro-1H,1'H-spiro[azepino[3,2,1-hi]indole-9,2'-quinoxalin]-4(2H)-one 14{35}**. General procedure B afforded the spiroheterocycle **14{35}** (79 mg, 0.178 mmol, 53% yield) as a tan solid. HRMS (ESI)  $m/z$  calcd for  $C_{28}H_{35}N_4O$  ( $[M+H]^+$ ) 443.2811, found 443.2814.

ID CMC-34-076-C5 File KF071008L15 Date 11-Jul-2008 Time 00:41:28 Description MDF008675

3: UV Detector: 214

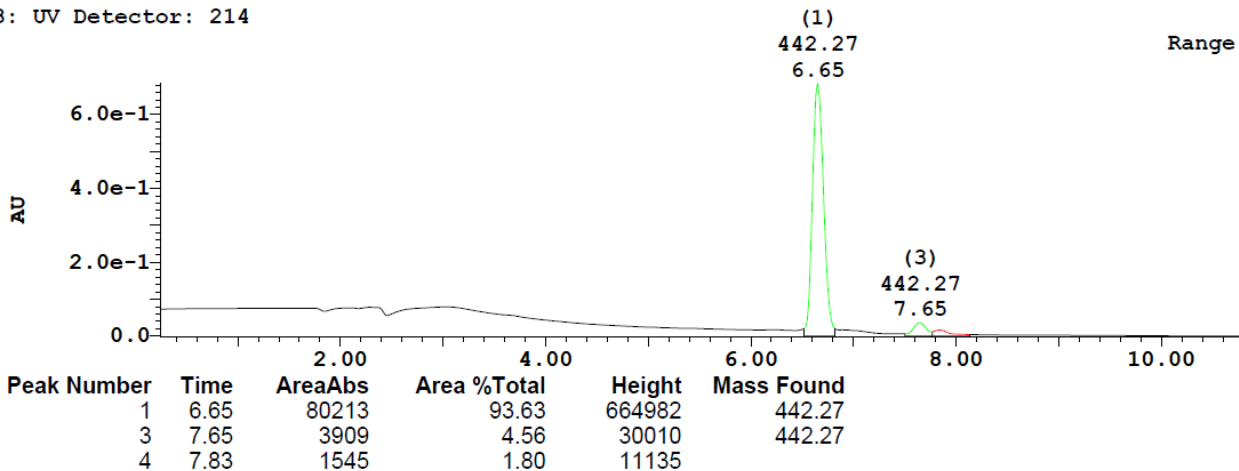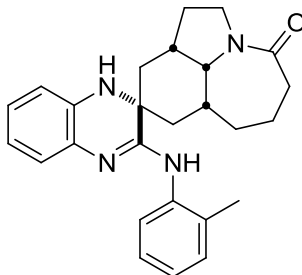

**3'-(o-Tolylamino)-31,5,6,7,7a,8,10,10a-octahydro-1H,1'H-spiro[azepino[3,2,1-hi]indole-9,2'-quinoxalin]-4(2H)-one 14{36}**. General procedure B afforded the spiroheterocycle **14{36}** (34

mg, 0.082 mmol, 24% yield) as a tan solid. Mp > 260 °C; <sup>1</sup>H NMR (CDCl<sub>3</sub>) δ 1.13 (t, *J* = 11.6 Hz, 1 H), 1.43 (t, *J* = 13.6 Hz, 1 H), 1.54-1.63 (complex, 3 H), 1.71-1.88 (complex, 3 H), 2.15 (s, 3 H), 2.31 (m, 1 H), 2.40 (ddd, *J* = 2.0, 6.0, 11.2 Hz, 1 H), 2.66 (m, 1 H), 2.73 (m, 1 H), 3.26 (m, 1 H), 3.58 (m, 2 H), 3.85 (m, 2 H), 6.46 (d, *J* = 7.2 Hz, 1 H), 6.49 (m, 1 H), 6.71 (m, 2 H), 6.82 (m, 2 H), 7.02 (dt, *J* = 1.2, 7.2 Hz, 1 H), 7.22 (m, 2 H); <sup>13</sup>C NMR δ d 18.2, 33.5, 40.1, 60.9, 113.8, 114.9, 119.6, 120.7, 122.4, 123.4, 127.1, 131.2; u 18.3, 28.9, 34.2, 35.6, 36.9, 39.4, 47.3, 55.7, 126.6, 129.5, 132.4, 146.4, 151.0, 175.4; IR 3397, 3289, 2928, 1648, 1617, 1609, 1594, 1506 cm<sup>-1</sup>; HRMS (ESI) *m/z* calcd for C<sub>26</sub>H<sub>31</sub>N<sub>4</sub>O ([M+H]<sup>+</sup>) 415.2498, found 415.2513.

ID CMC-34-076-D1 File KF071008L16 Date 11-Jul-2008 Time 00:53:47 Description MDF008678

3: UV Detector: 214

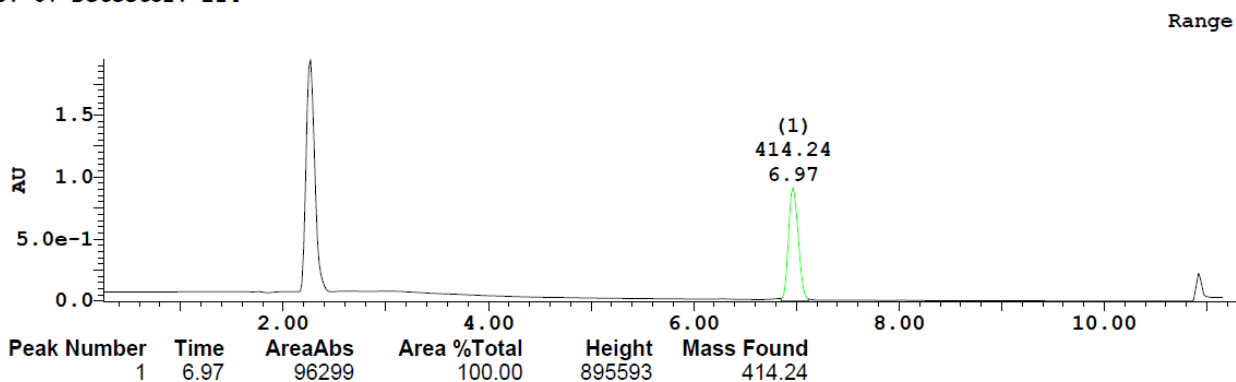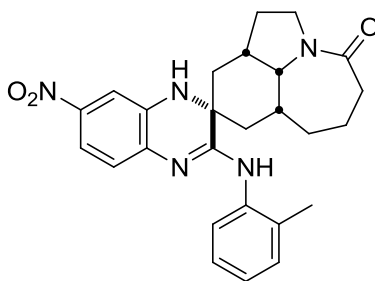

**7'-Nitro-3'-(o-tolylamino)-31,5,6,7,7a,8,10,10a-octahydro-1H,1'H-spiro[azepino[3,2,1-hi]indole-9,2'-quinoxalin]-4(2H)-one 14{37}**. General procedure B afforded the

spiroheterocycle **14{37}** (9 mg, 0.020 mmol, 6% yield) as a reddish brown solid. HRMS (ESI)  $m/z$  calcd for  $C_{26}H_{30}N_5O_3$  ( $[M+H]^+$ ) 460.2349, found 460.2350.

ID CMC-34-076-D2 File KF071008L17 Date 11-Jul-2008 Time 01:06:06 Description MDF008711

3: UV Detector: 214

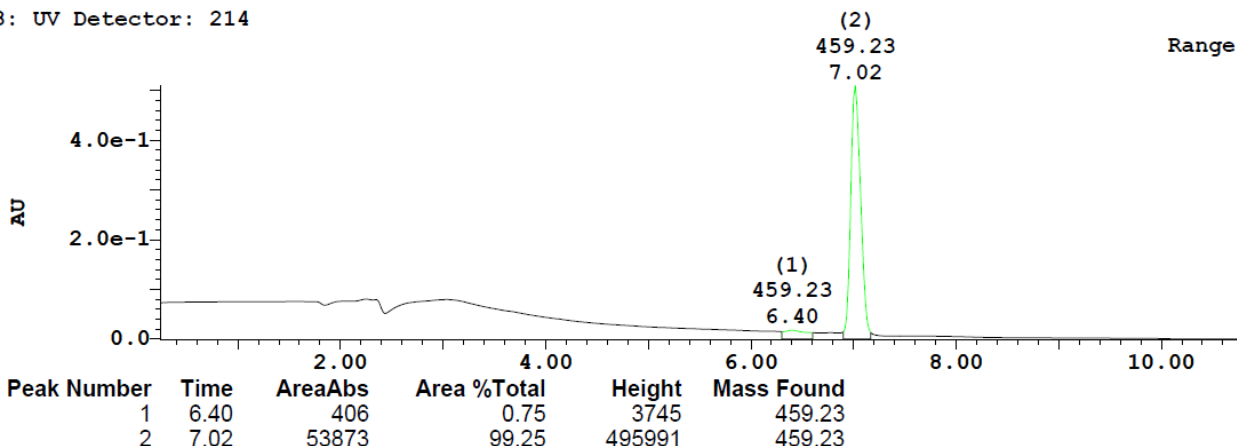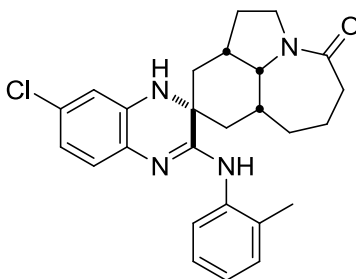

**7'-Chloro-3'-(o-tolylamino)-31,5,6,7,7a,8,10,10a-octahydro-1H,1'H-spiro[azepino[3,2,1-hi]indole-9,2'-quinoxalin]-4(2H)-one **14{38}****. General procedure B afforded the spiroheterocycle **14{38}** (37 mg, 0.082 mmol, 24% yield) as a yellow solid. Mp > 260 °C;  $^1H$  NMR ( $CDCl_3$ )  $\delta$  1.13 (t,  $J$  = 12.8 Hz, 1 H), 1.44 (m, 1 H), 1.53-1.71 (complex, 5 H), 1.75-1.88 (complex, 3 H), 2.14 (s, 3 H), 2.27-2.41 (m, 2 H), 2.64-2.73 (m, 2 H), 3.24 (m, 1 H), 3.57 (dt,  $J$  = 6.4, 16.0 Hz, 1 H), 3.82 (br s, 1 H), 3.85 (m, 1 H), 3.26 (m, 1 H), 6.49 (m, 1 H), 6.50 (d,  $J$  = 2.0 Hz, 1 H), 6.61 (d,  $J$  = 8.0 Hz, 1 H), 6.65 (m, 1 H), 6.78 (m, 1 H), 7.03 (t,  $J$  = 7.2 Hz, 1 H), 7.22 (m, 1 H);  $^{13}C$  NMR  $\delta$  d 33.5, 40.1, 41.1, 60.9, 113.8, 115.7, 120.5, 122.0, 123.8, 127.2, 131.3; u 18.4, 28.9, 34.1, 35.6, 36.8, 39.4, 47.4, 55.8, 124.3, 129.3, 131.1, 141.4, 146.1, 154.2, 175.4; IR

3300, 3268, 2940, 1656, 1596, 1505  $\text{cm}^{-1}$ ; HRMS (ESI)  $m/z$  calcd for  $\text{C}_{26}\text{H}_{30}\text{ClN}_4\text{O}$  ( $[\text{M}+\text{H}]^+$ ) 449.2108, found 449.2116.

ID CMC-34-076-D3 File KF071008L18 Date 11-Jul-2008 Time 01:18:25 Description MDF008691

3: UV Detector: 214

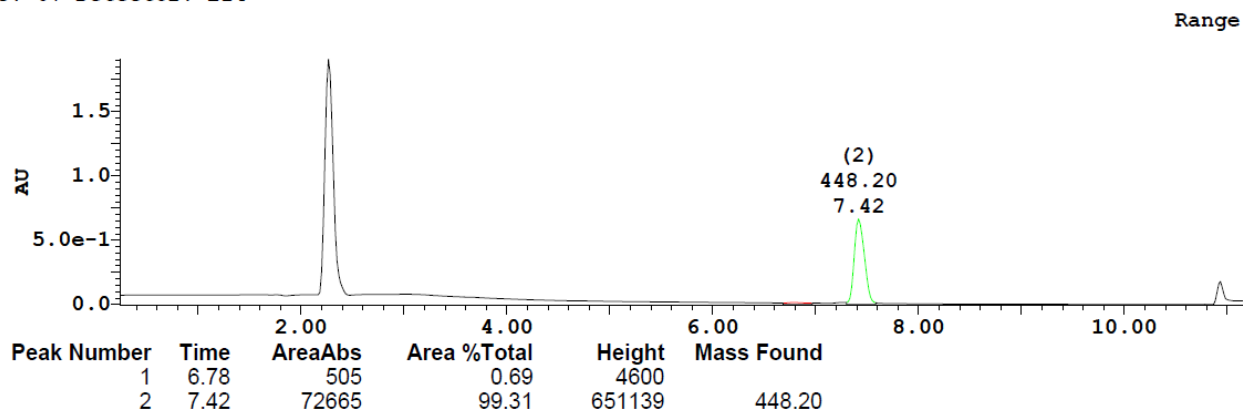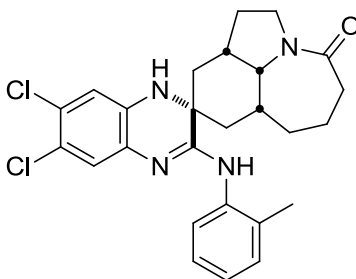

**6',7'-Dichloro-3'-(*o*-tolylamino)-31,5,6,7,7a,8,10,10a-octahydro-1H,1'H-spiro[azepino[3,2,1-hi]indole-9,2'-quinoxalin]-4(2H)-one **14{39}****. General procedure B afforded the spiroheterocycle **14{39}** (23 mg, 0.048 mmol, 14% yield) as a tan solid. HRMS (ESI)  $m/z$  calcd for  $\text{C}_{26}\text{H}_{29}\text{Cl}_2\text{N}_4\text{O}$  ( $[\text{M}+\text{H}]^+$ ) 483.1718, found 483.1702.

3: UV Detector: 214

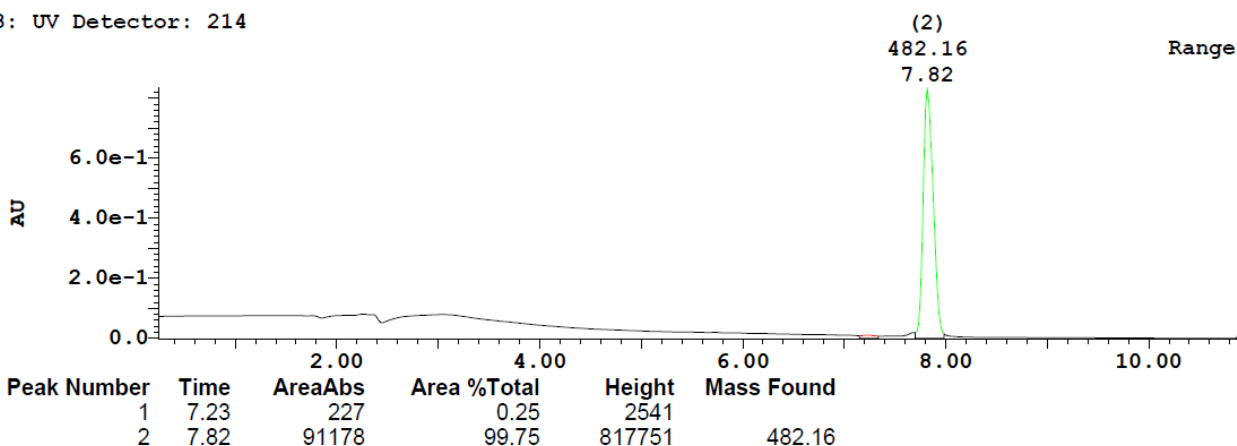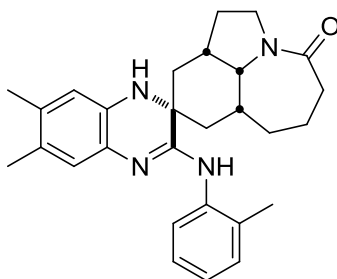

**6',7'-Dimethyl-3'-(o-tolylamino)-31,5,6,7,7a,8,10,10a-octahydro-1H,1'H-**

**spiro[azepino[3,2,1-hi]indole-9,2'-quinoxalin]-4(2H)-one 14{40}**. General procedure B

afforded the spiroheterocycle **14{40}** (52 mg, 0.118 mmol, 35% yield) as a tan solid. Mp = 243-248 °C (dec);  $^1\text{H NMR}$  ( $\text{CDCl}_3$ )  $\delta$  1.10 (t,  $J = 12.8$  Hz, 1 H), 1.39 (t,  $J = 12.8$  Hz, 1 H), 1.51-1.62 (m, 3 H), 1.72-1.82 (complex, 4 H), 2.09 (s, 3 H), 2.14 (s, 3 H), 2.15 (s, 3 H), 2.30 (m, 1 H), 2.38 (ddd,  $J = 2.4, 7.6, 14.0$  Hz, 1 H), 2.63 (m, 1 H), 2.68 (m, 1 H), 3.25 (m, 1 H), 3.57 (dt,  $J = 6.4, 12.0$  Hz, 1 H), 3.82 (m, 1 H), 3.85 (m, 1 H), 6.29 (s, 1 H), 6.35 (s, 1 H), 6.49 (s, 1 H), 6.80 (dd,  $J = 1.2, 7.6$  Hz, 1 H), 7.00 (dt,  $J = 1.2, 7.6$  Hz, 1 H), 7.19 (dt,  $J = 1.2, 7.6$  Hz, 1 H), 7.23 (d,  $J = 7.2$  Hz);  $^{13}\text{C NMR}$   $\delta$  18.2, 18.9, 19.2, 33.5, 40.1, 61.1, 115.1, 116.5, 120.8, 123.4, 127.1, 131.2; u 18.4, 28.9, 34.1, 35.7, 36.9, 39.4, 47.4, 55.8, 124.6, 127.6, 129.5, 130.2, 130.4, 146.7, 151.3,

175.4; IR 3311, 2928, 2861, 1644, 1615, 1592, 1516  $\text{cm}^{-1}$ ; HRMS (ESI)  $m/z$  calcd for  $\text{C}_{28}\text{H}_{35}\text{N}_4\text{O}$  ( $[\text{M}+\text{H}]^+$ ) 443.2811, found 443.2798.

ID CMC-34-076-D5 File KF071008L20 Date 11-Jul-2008 Time 01:43:03 Description MDF008688

3: UV Detector: 214

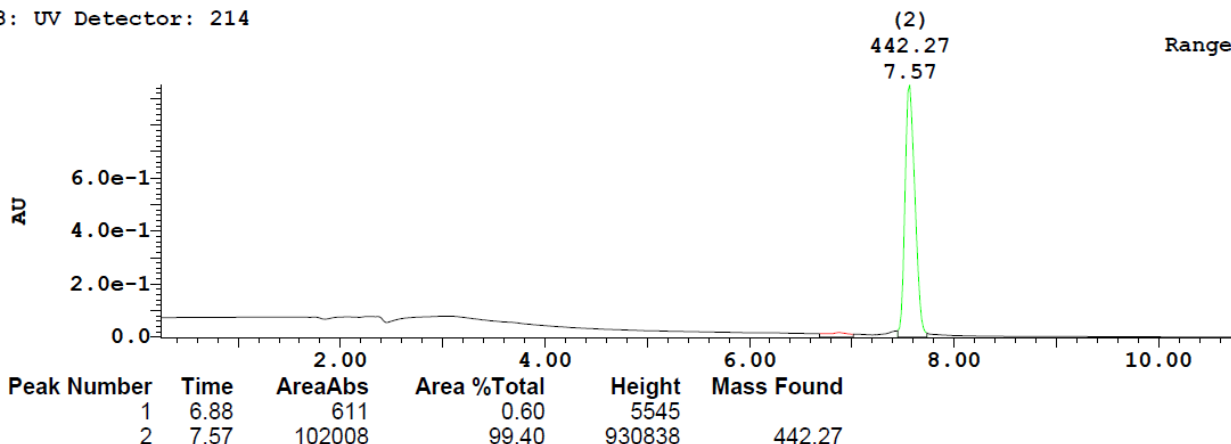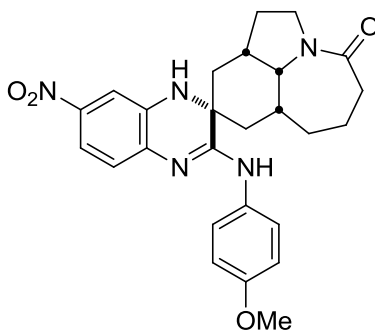

**((4-Methoxyphenyl)amino)-7'-nitro-31,5,6,7,7a,8,10,10a-octahydro-1H,1'H-**

**spiro[azepino[3,2,1-hi]indole-9,2'-quinoxalin]-4(2H)-one 14{41}**. A reaction vial was charged with a magnetic stir bar, ketoamide **8b** (50 mg, 0.24 mmol), diamine fragment **13b** (44 mg, 0.29 mmol, 1.2 equiv.) and *p*-toluenesulfonic acid (5 mg, 0.024 mmol, 0.1 equiv.). A solution of isonitrile **12e** (38 mg, 0.29 mmol, 1.2 equiv.) in EtOH (2.0 mL) was added via syringe through the septum cap and the reaction stirred for 14 h at rt. Water (7 mL) was added to precipitate the products. The reaction mixture was filtered and the collected precipitate was washed with NaOH (0.5 N, 2 mL) and water (3 mL). The crude product was purified by chromatography on silica gel

to afford the spiroheterocycle **14{41}** (79 mg, 0.166 mmol, 69% yield) as a red-brown solid. Mp > 260 °C; <sup>1</sup>H NMR (CDCl<sub>3</sub>) δ 1.31 (m, 1 H), 1.47-1.62 (complex, 5 H), 1.75-1.88 (complex, 3 H), 2.35 (m, 2 H), 2.62 (m, 2 H), 3.23 (m, 1 H), 3.56 (m, 1 H), 3.83 (s, 3 H), 3.84 (m, 2 H), 5.20 (s, 1 H), 6.53 (d, *J* = 8.8 Hz, 1 H), 6.84 (m, 2 H), 6.94 (m, 2 H), 7.04 (br s, 1 H), 7.62 (m, 2 H); <sup>13</sup>C NMR δ d 33.3, 39.8, 55.5, 60.8, 109.8, 112.8, 115.2 (× 2), 115.6, 122.0 (× 2); u 18.3, 28.8, 34.0, 35.7, 36.0, 47.3, 55.4, 133.1, 140.1, 142.5, 150.8, 156.2, 175.2; IR 3335, 2929, 2855, 1612, 1524, 1502 cm<sup>-1</sup>; HRMS calcd for C<sub>26</sub>H<sub>30</sub>N<sub>5</sub>O<sub>4</sub> [M + H<sup>+</sup>] 476.2298, found 476.2292.

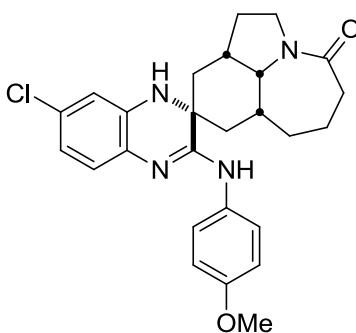

**((4-Methoxyphenyl)amino)-31,5,6,7,7a,8,10,10a-octahydro-1H,1'H-spiro[azepino[3,2,1-hi]indole-9,2'-quinoxalin]-4(2H)-one 14{42}**. A reaction vial was charged with a magnetic stir bar, ketoamide **8b** (50 mg, 0.24 mmol), diamine fragment **13c** (41 mg, 0.29 mmol, 1.2 equiv.) and *p*-toluenesulfonic acid (5 mg, 0.024 mmol, 0.1 equiv.). A solution of isonitrile **12e** (38 mg, 0.29 mmol, 1.2 equiv.) in EtOH (2.0 mL) was added via syringe through the septum cap and the reaction stirred for 14 h at rt. Water (7 mL) was added to precipitate the products. The reaction mixture was filtered and the collected precipitate was washed with NaOH (0.5 N, 2 mL) and water (3 mL). The crude product was purified by chromatography on silica gel to afford the spiroheterocycle **14{42}** (81 mg, 0.174 mmol, 73% yield) as a pink solid. Mp > 260 °C; <sup>1</sup>H NMR (CDCl<sub>3</sub>) δ 1.12 (t, *J* = 12.8 Hz, 1 H), 1.41 (t, *J* = 13.2 Hz, 1 H), 1.58 (m, 1 H), 1.64 (m, 2 H), 1.75-1.86 (complex, 3 H), 2.33 (m, 2 H), 2.62 (m, 2 H), 3.22 (m, 1 H), 3.54 (m, 1 H), 3.82 (s, 3

H), 3.87 (m, 3 H), 6.51 (d,  $J = 2.0$  Hz, 1 H), 6.63 (m, 2 H), 6.76 (dd,  $J = 2.0, 8.4$  Hz, 1 H), 6.81 (d,  $J = 2.0$  Hz, 1 H), 6.83 (t,  $J = 2.4$  Hz, 2 H), 6.93 (m, 2 H);  $^{13}\text{C}$  NMR  $\delta$  d 33.4, 40.0, 55.6, 61.0, 113.7, 115.2 ( $\times 2$ ), 115.7, 121.9, 122.2 ( $\times 2$ ); u 18.4, 28.9, 34.1, 35.7, 36.5, 39.4, 47.4, 55.6, 124.2, 127.7, 131.2, 140.7, 151.5, 156.0, 175.4; IR 3287, 2928, 2873, 1604, 1571, 1515  $\text{cm}^{-1}$ ; HRMS calcd for  $\text{C}_{26}\text{H}_{30}\text{ClN}_4\text{O}_2$  [ $\text{M} + \text{H}^+$ ] 465.2057, found 465.2050.

Sample 4 Vial 4:41 ID CMC-34-042-C File KF041808L04 Date 21-Apr-2008 Time 21:49:35 Description

1: TOF MS ES+ :465.206 Smooth (SG, 2x3)

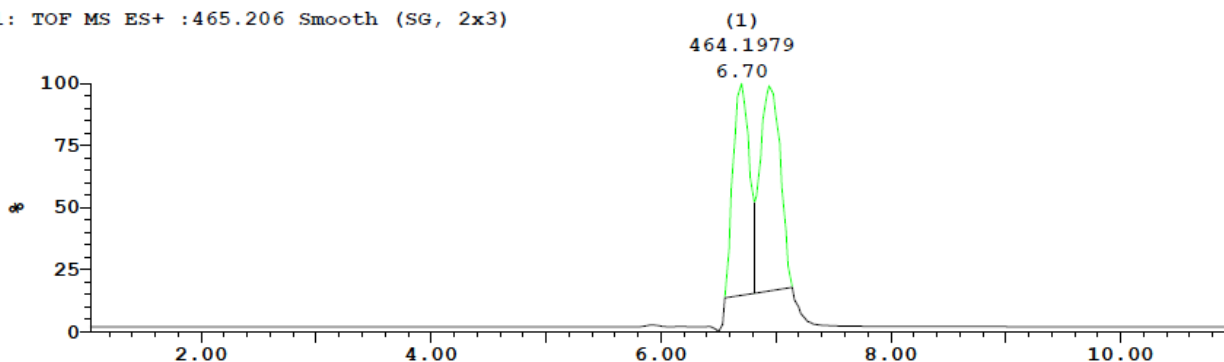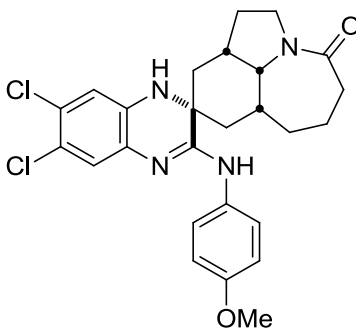

**6',7'-Dichloro-3'-((4-methoxyphenyl)amino)-31,5,6,7,7a,8,10,10a-octahydro-1H,1'H-spiro[azepino[3,2,1-hi]indole-9,2'-quinoxalin]-4(2H)-one 14{43}**. A reaction vial was charged with a magnetic stir bar, ketoamide **8b** (50 mg, 0.24 mmol), diamine fragment **13c** (41 mg, 0.29 mmol, 1.2 equiv.) and *p*-toluenesulfonic acid (5 mg, 0.024 mmol, 0.1 equiv.). A solution of isonitrile **12e** (38 mg, 0.29 mmol, 1.2 equiv.) in EtOH (2.0 mL) was added via syringe through the septum cap and the reaction stirred for 14 h at rt. Water (7 mL) was added to precipitate the



products. The reaction mixture was filtered and the collected precipitate was washed with NaOH (0.5 N, 2 mL) and water (3 mL). The crude product was purified by chromatography on silica gel to afford the spiroheterocycle **14{43}** (27 mg, 0.055 mmol, 23% yield) as a light brown solid. Mp > 260 °C;  $^1\text{H NMR}$  ( $\text{CDCl}_3$ )  $\delta$  1.15 (t,  $J = 13.2$  Hz, 1 H), 1.40-1.68 (complex, 4 H), 1.75-1.87 (complex, 4 H), 2.31 (m, 1 H), 2.62 (m, 2 H), 3.22 (m, 1 H), 3.52 (m, 1 H), 3.82 (s, 3 H), 3.84 (m, 2 H), 6.59 (s, 1 H), 6.67 (br s, 1 H), 6.78 (m, 1 H), 6.79 (m, 1 H), 6.82 (m, 1 H), 6.91 (t,  $J = 2.8$  Hz, 1 H), 6.94 (m, 1 H);  $^{13}\text{C NMR}$   $\delta$  d 33.3, 39.8, 55.5, 60.8, 114.7, 115.2 ( $\times 2$ ), 115.7, 122.0 ( $\times 2$ ); u 18.3, 28.8, 34.1, 35.7, 36.2, 39.3, 47.3, 55.6, 121.7, 124.7, 126.4, 132.5, 140.5, 151.1, 156.0, 175.3; IR 3289, 2929, 2877, 1606, 1574, 1515  $\text{cm}^{-1}$ ; HRMS calcd for  $\text{C}_{26}\text{H}_{29}\text{Cl}_2\text{N}_4\text{O}_2$  [ $\text{M} + \text{H}^+$ ] 499.1668, found 499.1664.

**Sample 3 Vial 4:40 ID CMC-34-042-D File KF041808L03 Date 21-Apr-2008 Time 21:34:37 Description**

1: TOF MS ES+ :499.167 Smooth (SG, 2x3)

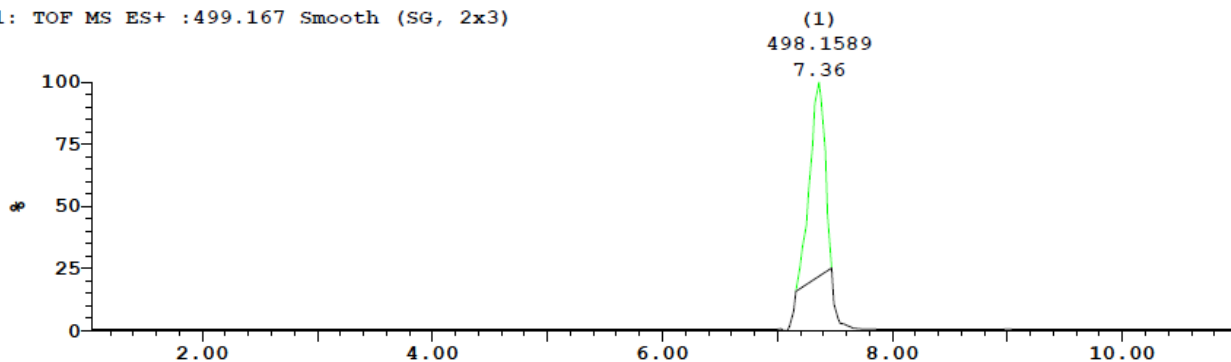

| Peak ID | Time |
|---------|------|
| 1       | 7.36 |

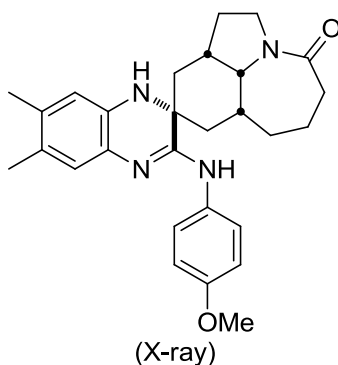

**3'-((4-Methoxyphenyl)amino)-6',7'-dimethyl-31,5,6,7,7a,8,10,10a-octahydro-1H,1'H-**

**spiro[azepino[3,2,1-hi]indole-9,2'-quinoxalin]-4(2H)-one 14{44}**. A reaction vial was charged with a magnetic stir bar, ketoamide **8b** (50 mg, 0.24 mmol), diamine fragment **13e** (39 mg, 0.29 mmol, 1.2 equiv.) and *p*-toluenesulfonic acid (5 mg, 0.024 mmol, 0.1 equiv.). A solution of isonitrile **12e** (38 mg, 0.29 mmol, 1.2 equiv.) in EtOH (2.0 mL) was added via syringe through the septum cap and the reaction stirred for 14 h at rt. Water (7 mL) was added to precipitate the products. The reaction mixture was filtered and the collected precipitate was washed with NaOH (0.5 N, 2 mL) and water (3 mL). The crude product was purified by chromatography on silica gel to afford the spiroheterocycle **14{44}** (78 mg, 0.170 mmol, 71% yield) as a light brown solid.

TLC  $R_f$  = 0.54 (50% acetone in  $\text{CH}_2\text{Cl}_2$ ); mp > 260 °C;  $^1\text{H}$  NMR ( $\text{CDCl}_3$ )  $\delta$  1.08 (t,  $J$  = 11.6 Hz, 1 H), 1.36 (m, 1 H), 1.55 (m, 2 H), 1.70-1.82 (m, 3 H), 2.09 (s, 3 H), 2.14 (s, 3 H), 2.32 (m, 2 H), 2.62 (m, 2 H), 3.23(m, 1 H), 3.50 (m, 1 H), 3.56 (m, 1 H), 3.81 (s, 3 H), 3.83 (m, 1 H), 5.30 (s, 1 H), 6.29 (s, 1 H), 6.49 (m, 2 H), 6.82 (d,  $J$  = 8.8 Hz, 1 H), 6.92 (d,  $J$  = 8.8 Hz, 2 H);  $^{13}\text{C}$  NMR  $\delta$  d 18.9, 19.2, 33.4, 39.9, 55.5, 61.0, 115.0, 115.1 ( $\times$  2), 116.4, 122.3 ( $\times$  2); u 18.3, 28.8, 34.0, 35.7, 36.5, 39.3, 47.3, 55.6, 124.5, 127.5, 130.0, 130.2, 141.3, 152.3, 155.7, 175.3; IR 3294, 2927, 2857, 1640, 1611, 1500  $\text{cm}^{-1}$ ; HRMS calcd for  $\text{C}_{28}\text{H}_{35}\text{N}_4\text{O}_2$  [ $\text{M} + \text{H}^+$ ] 459.2760, found 459.2728.

CMC-6-235\_001000fid

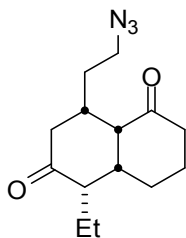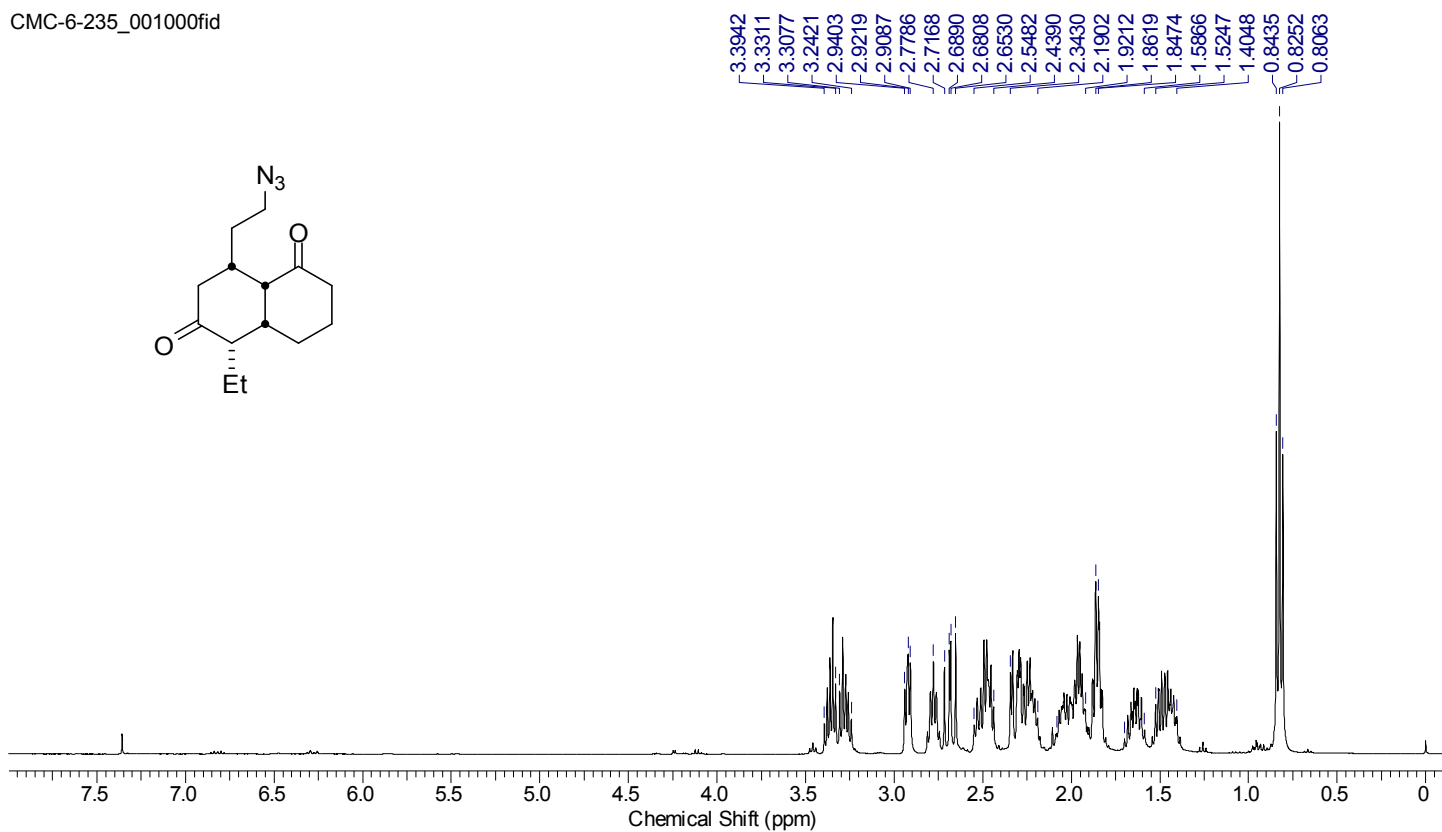

CMC-6-235\_002000fid

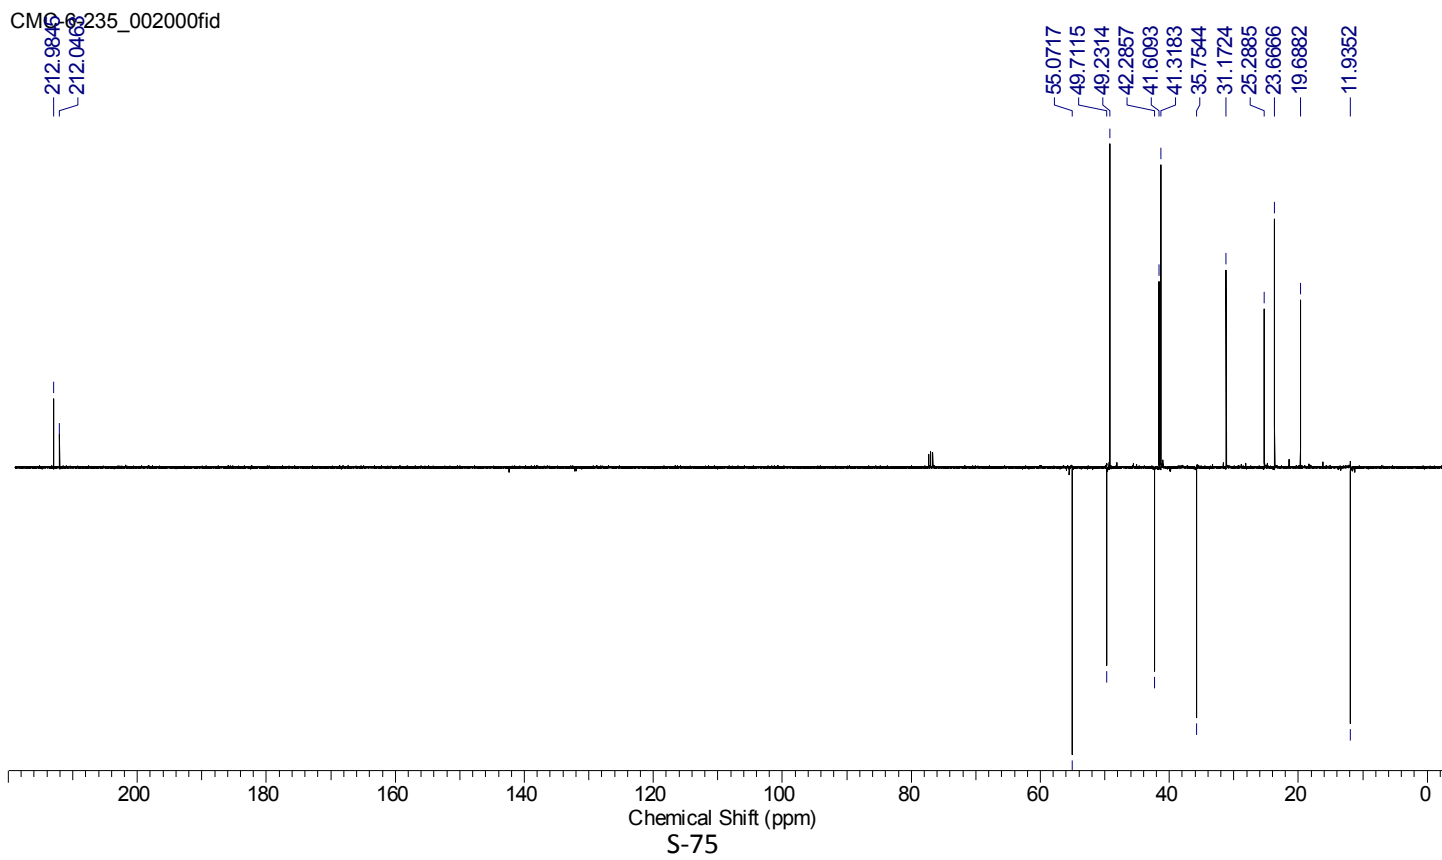

CMC-6-245B\_001000fid

3.1297  
3.1189  
3.0994  
3.0930  
3.0886  
2.7887  
2.7812  
2.7584  
2.7515  
2.7288  
2.3165  
2.1410  
1.8373  
1.8000  
1.7489  
1.3606  
1.2690  
1.1484  
0.8296  
0.8113  
0.7924

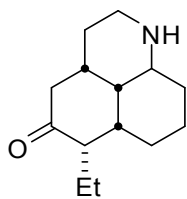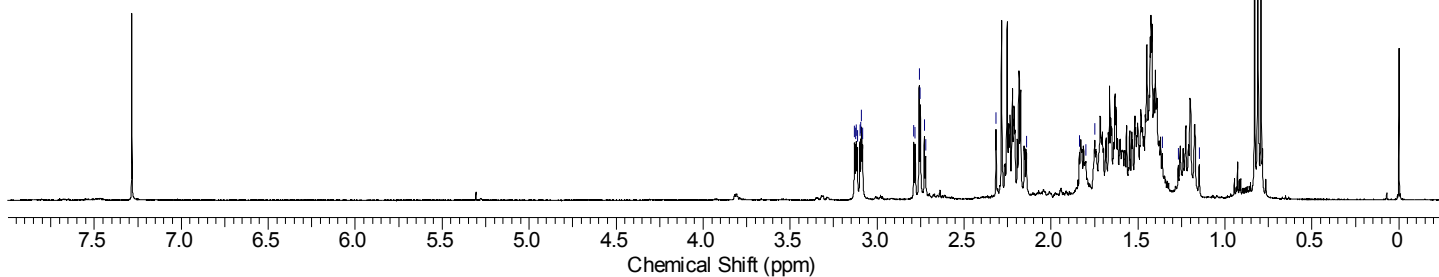

CMC-6-245Y2\_002000fid

214.0316

60.9702  
57.3409  
46.5186  
46.1186  
44.6349  
43.6603  
42.3439  
34.2562  
33.1798  
29.2160  
24.5248  
19.5573  
11.8833

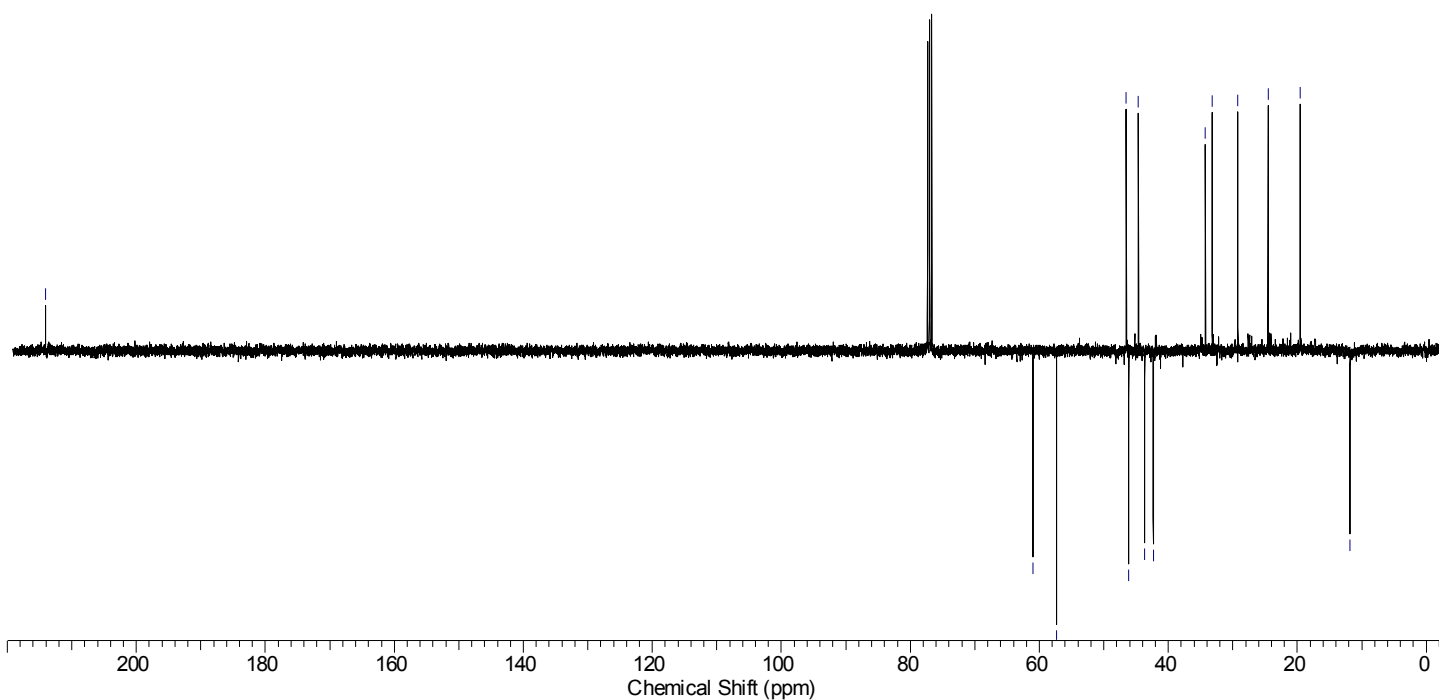

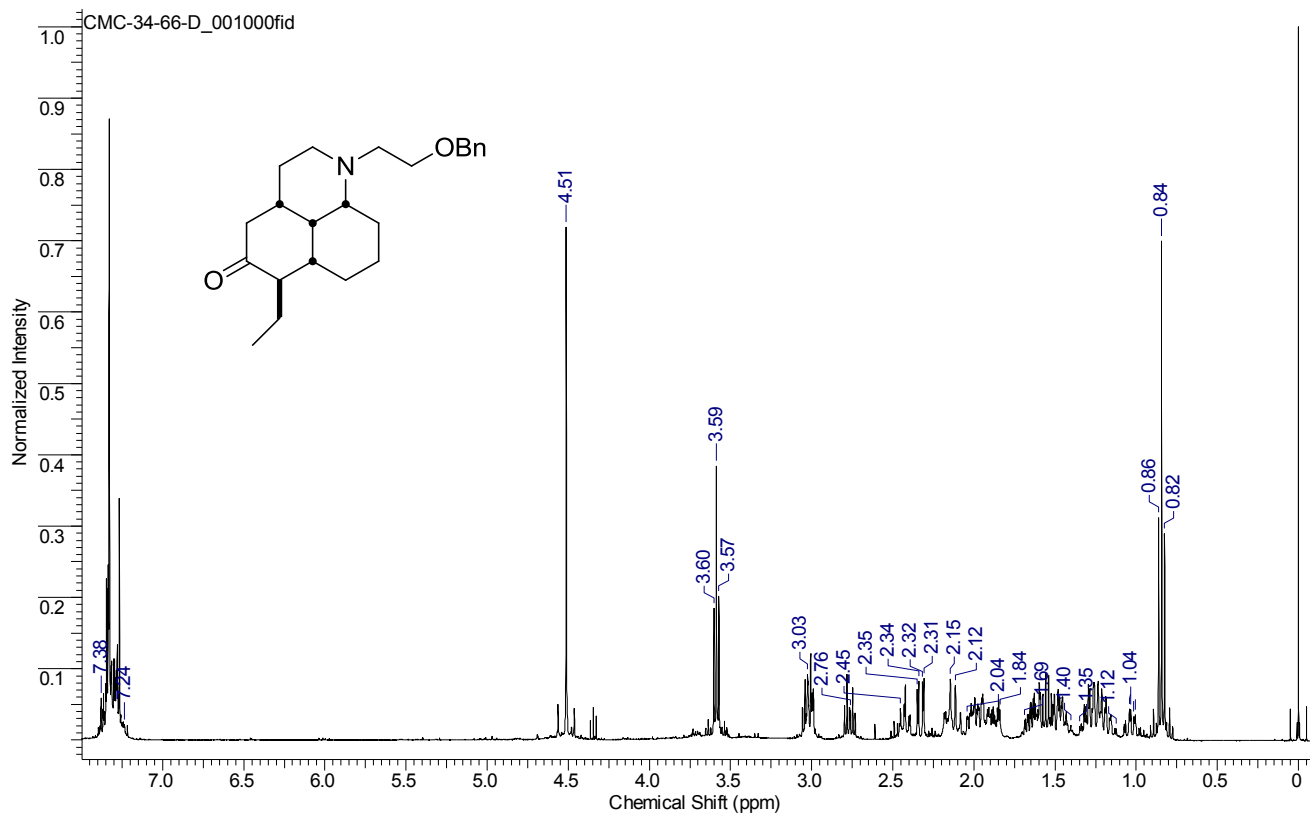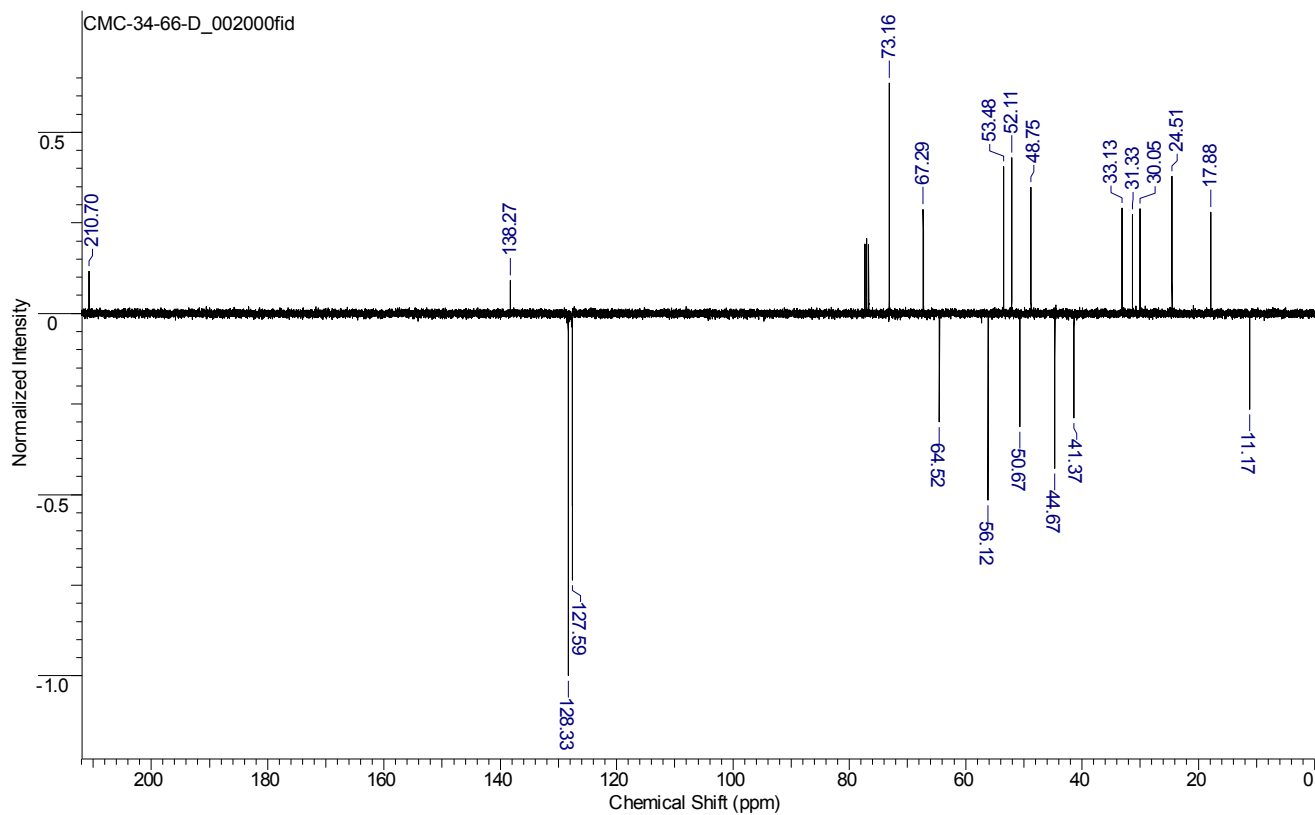

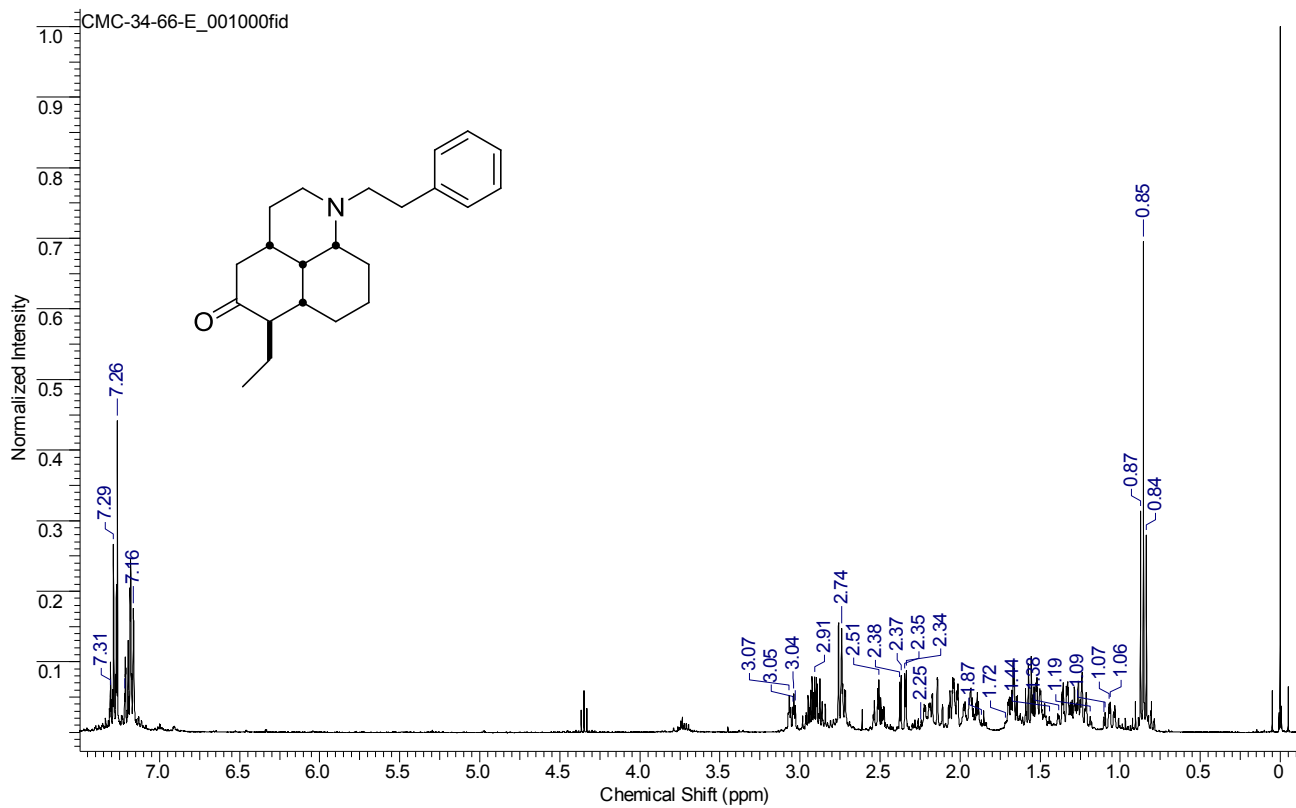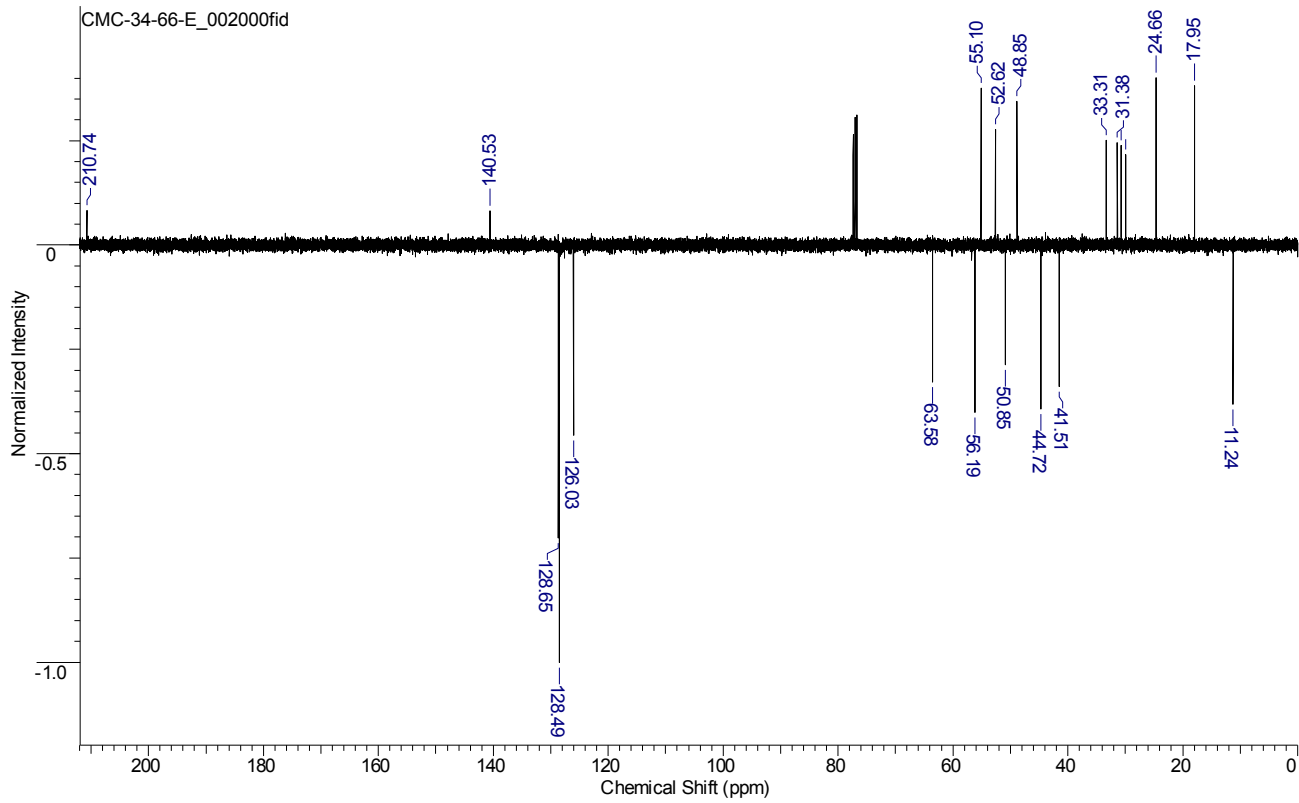

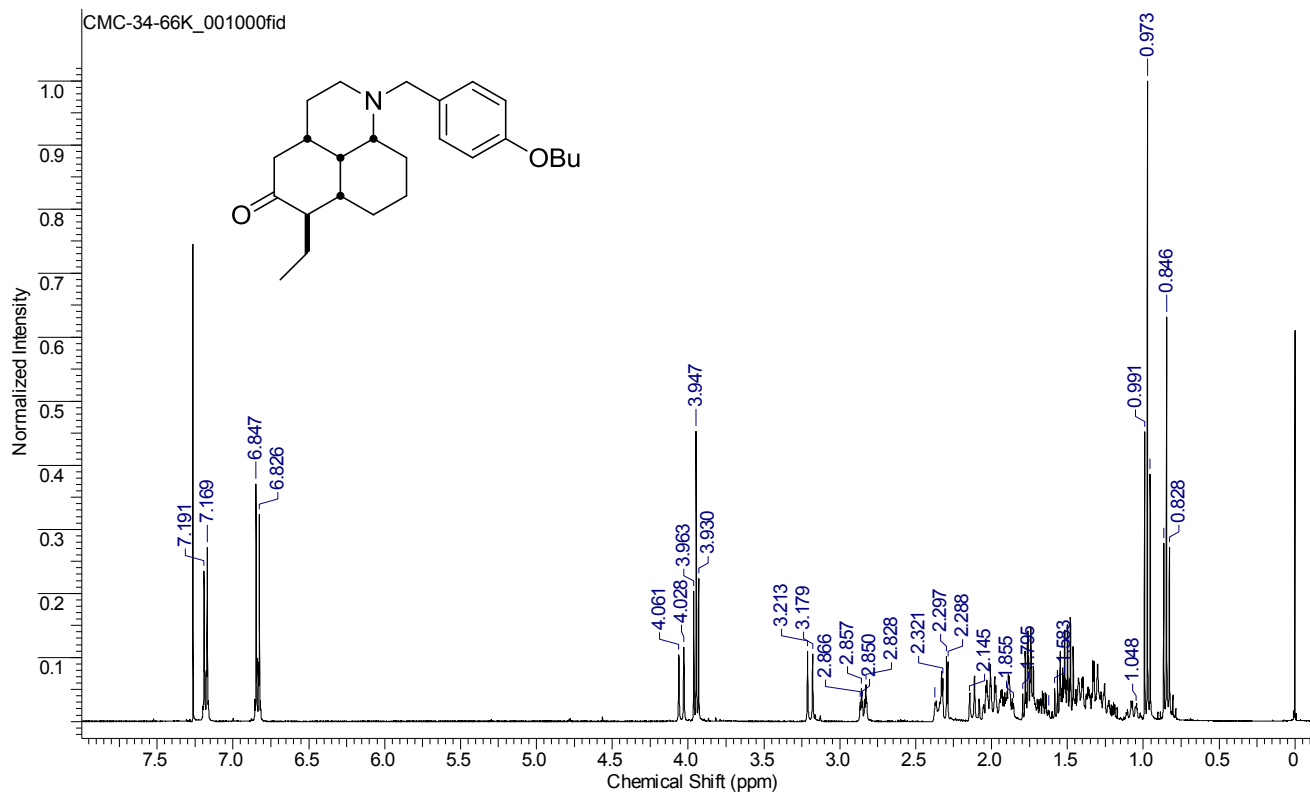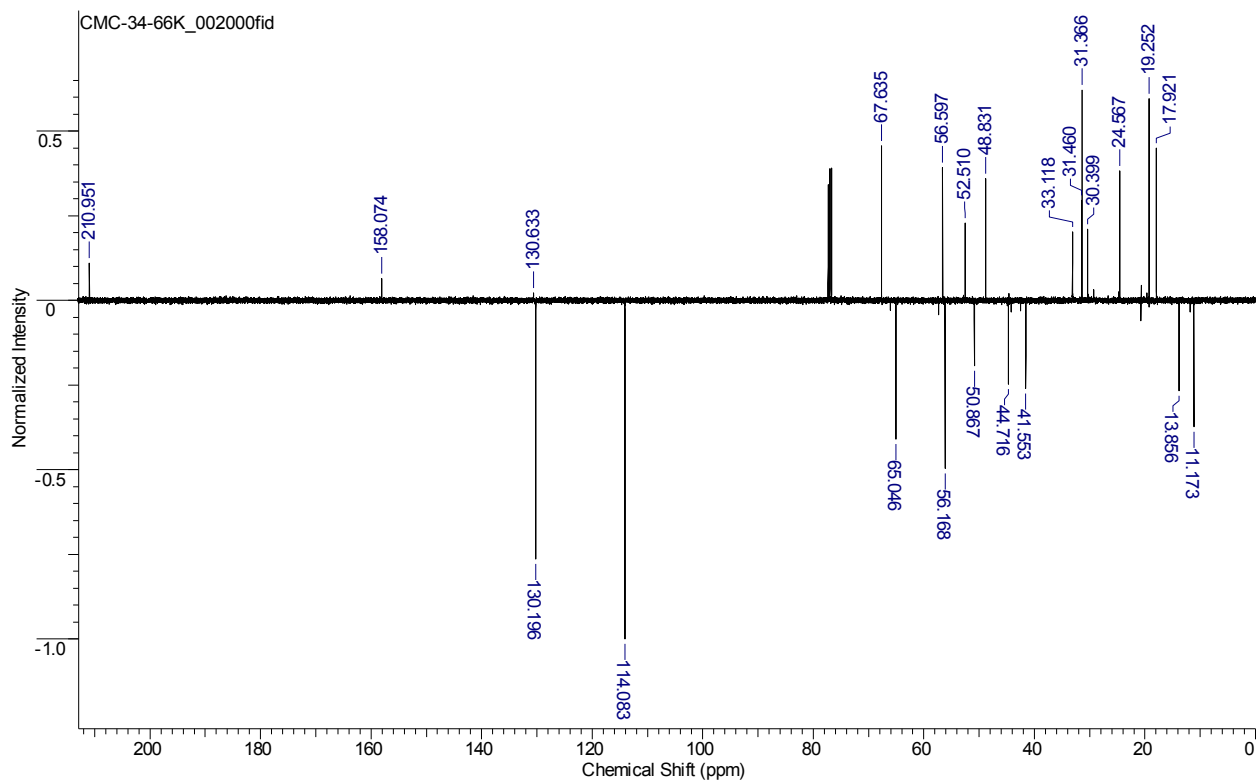

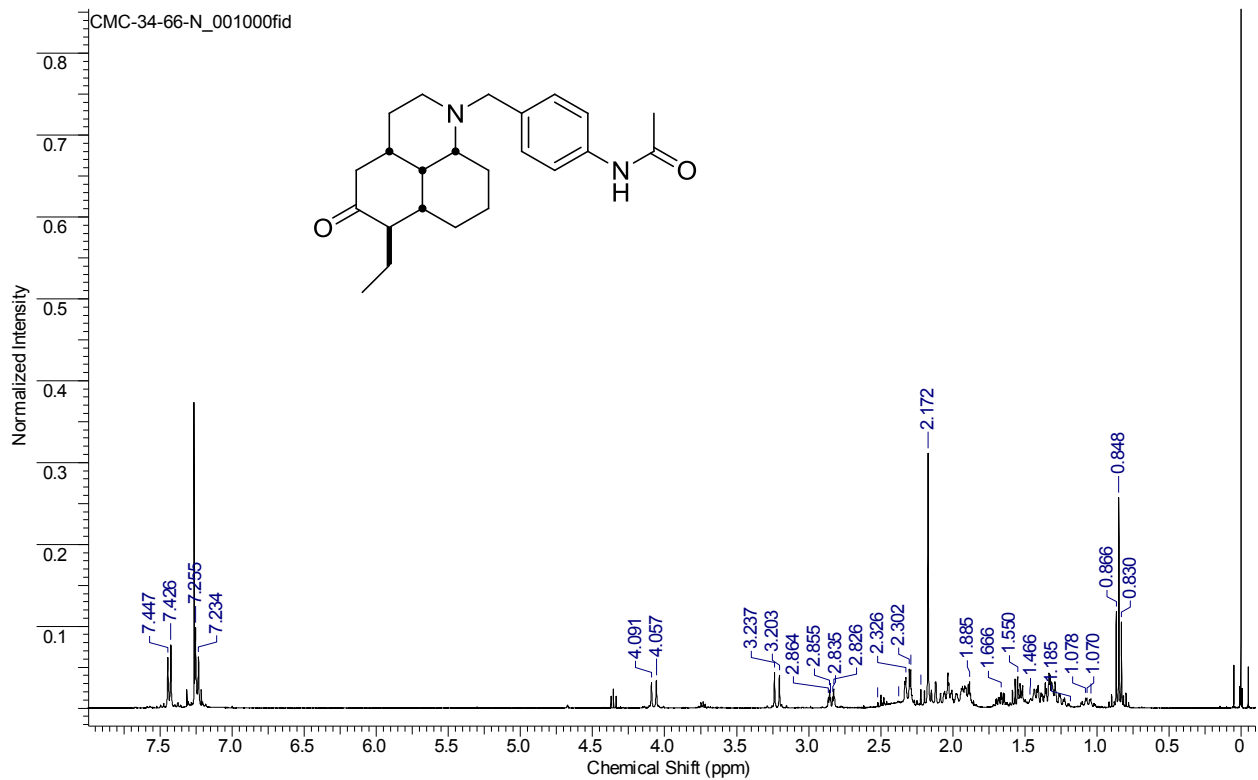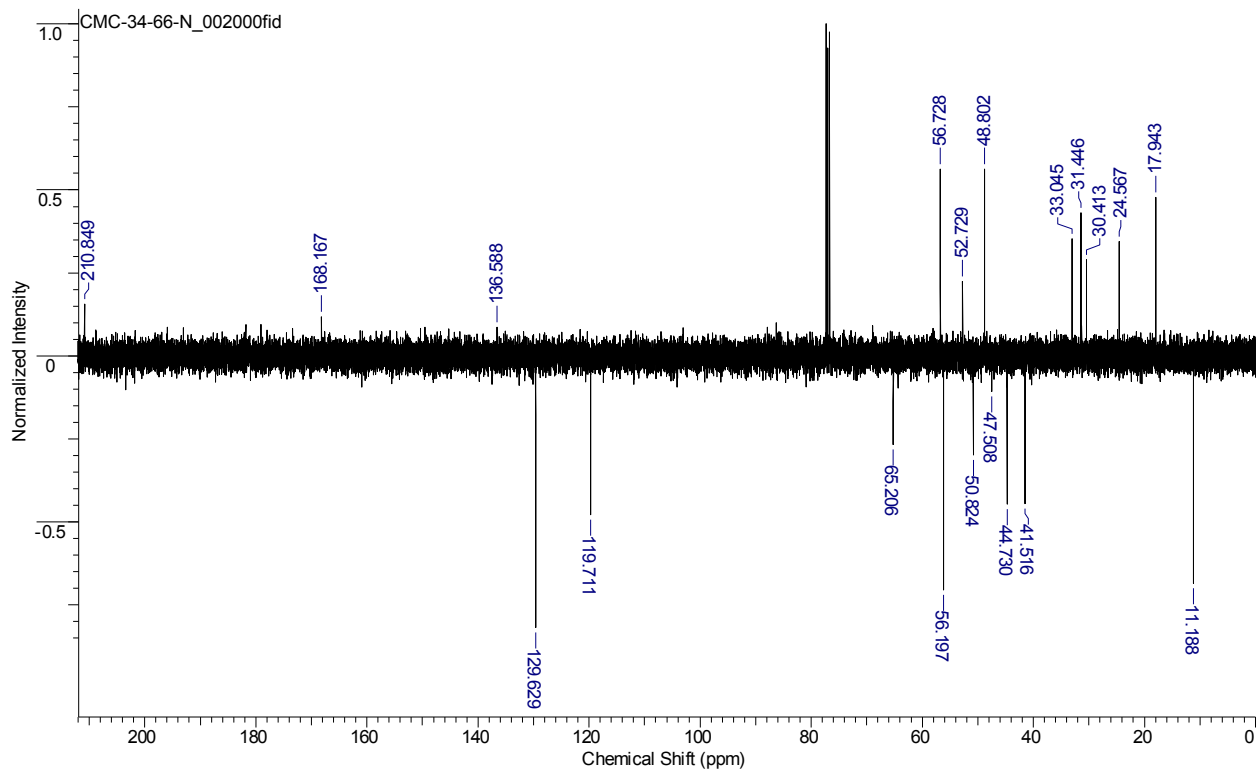



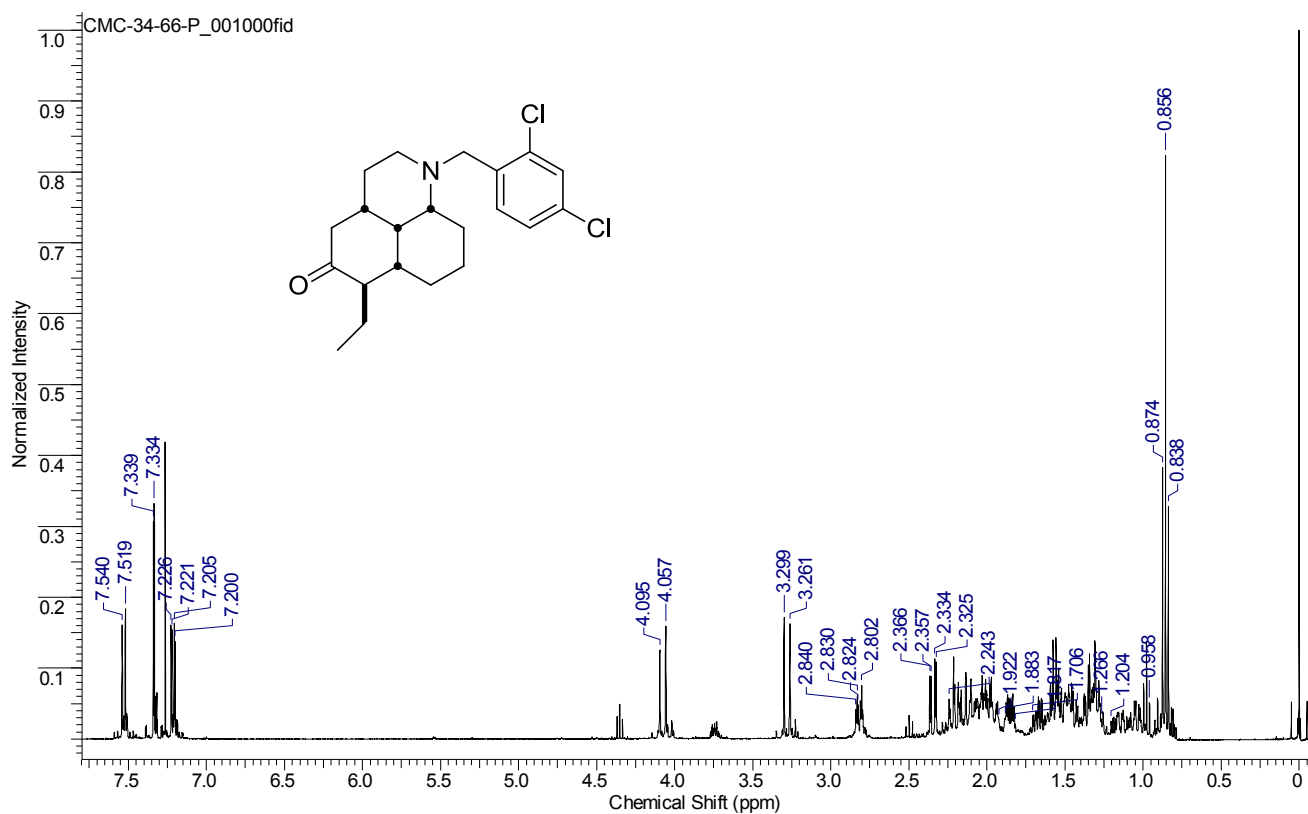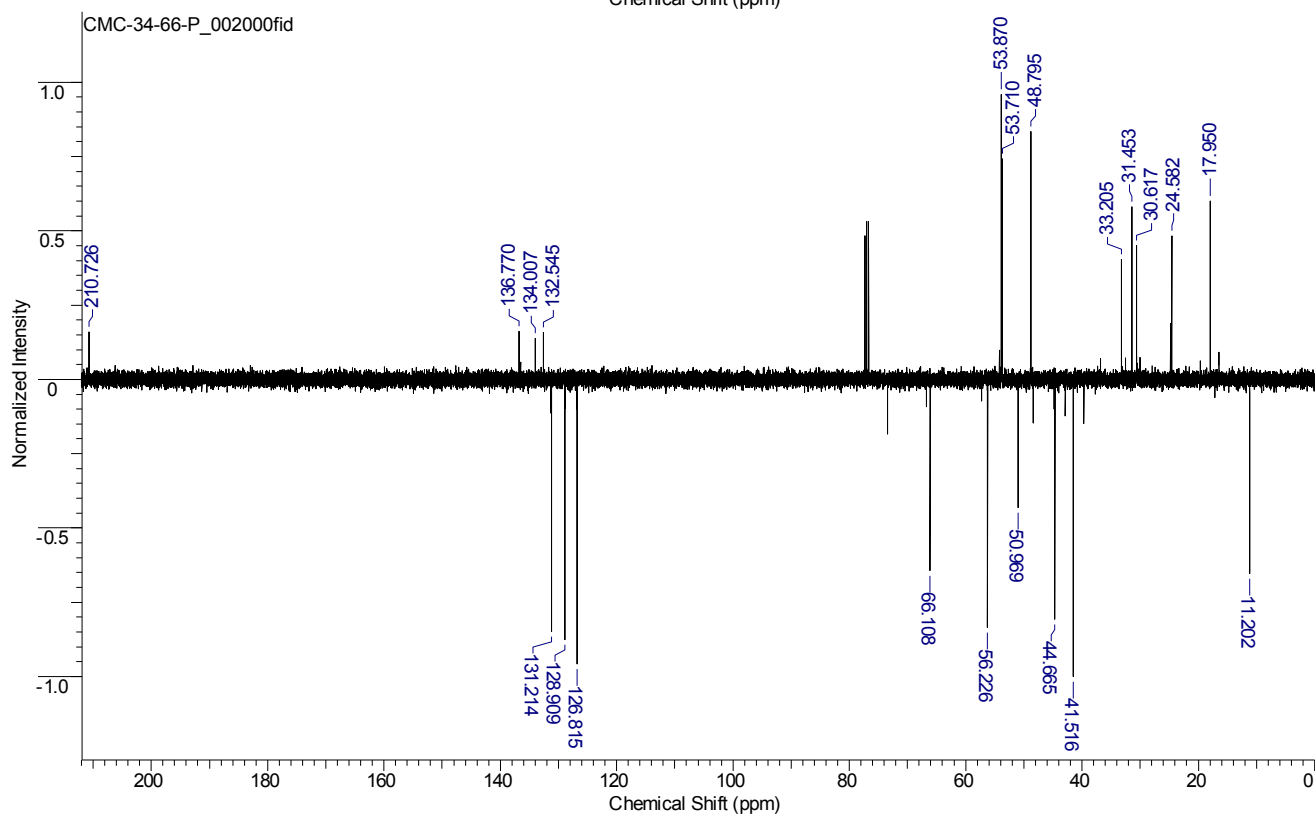

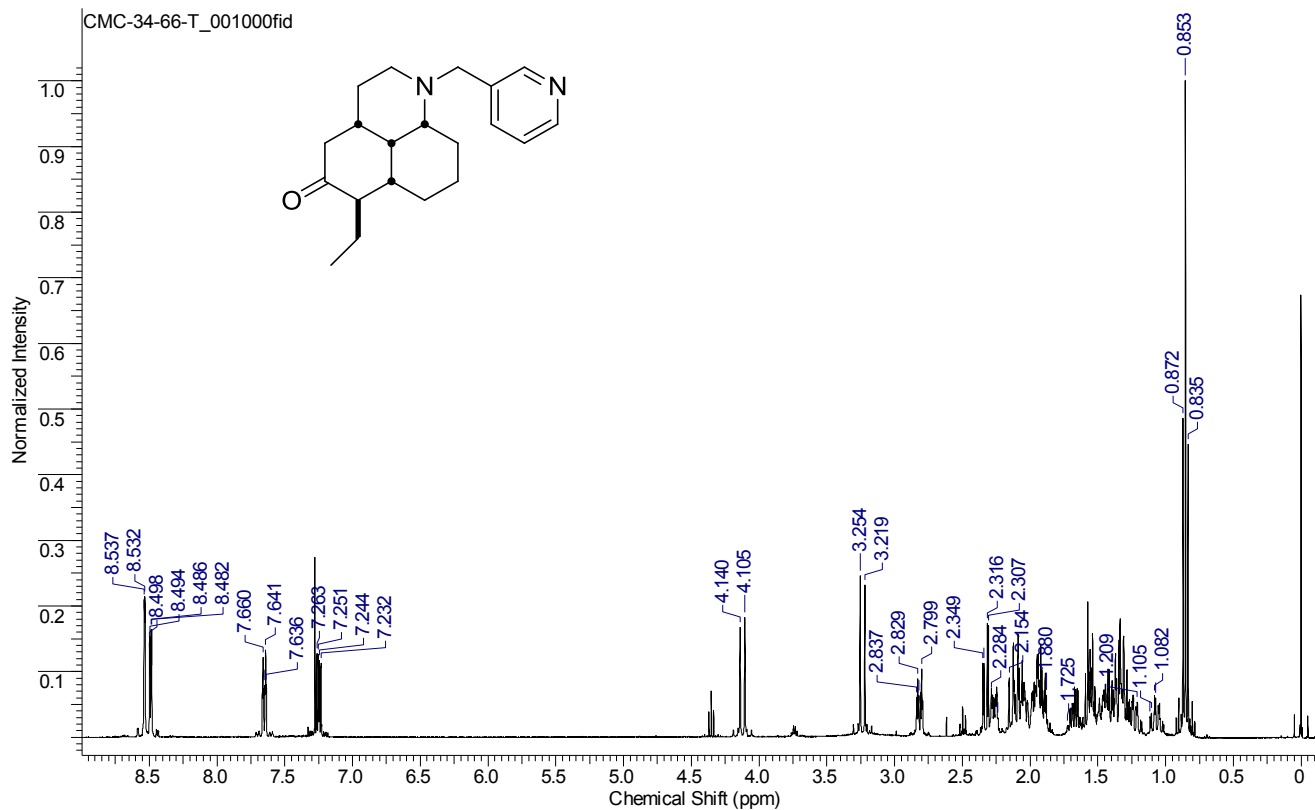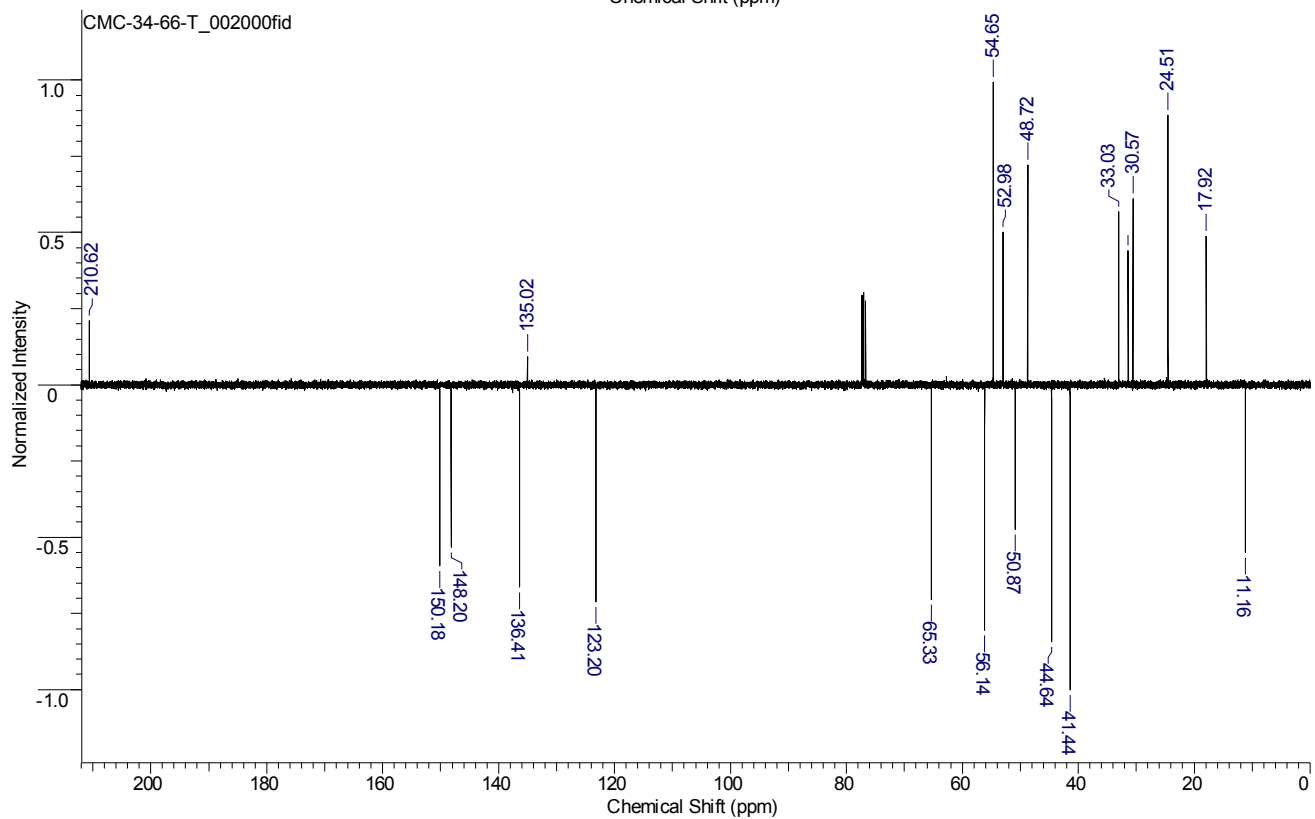

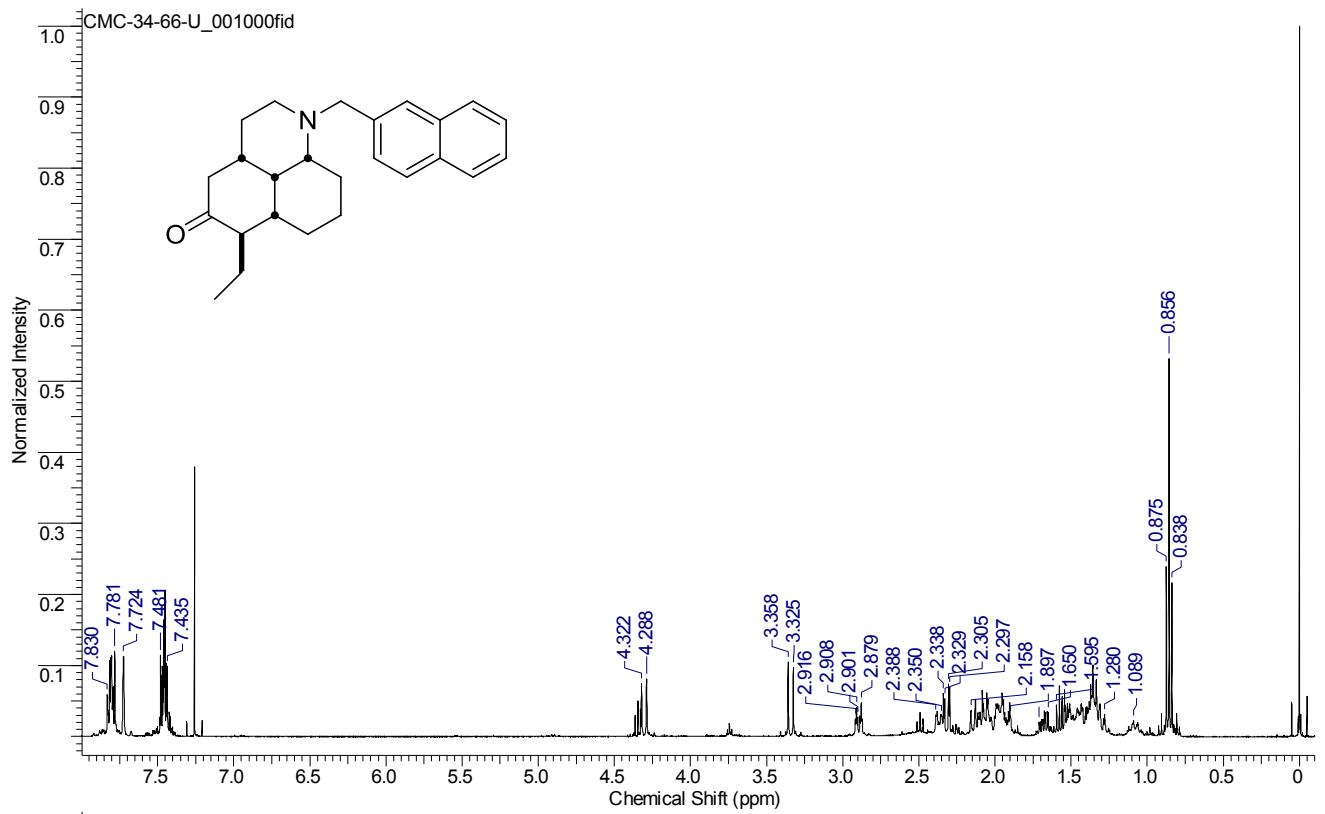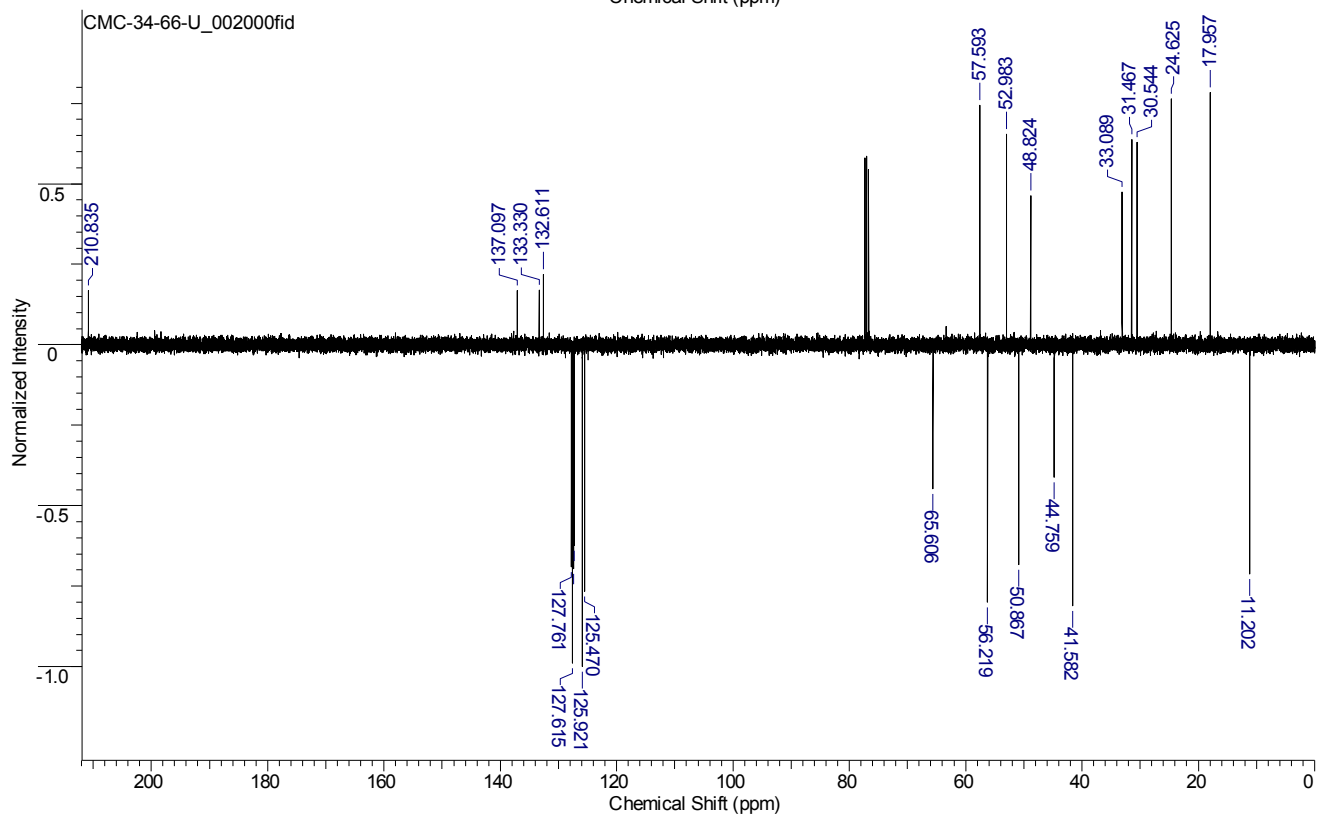

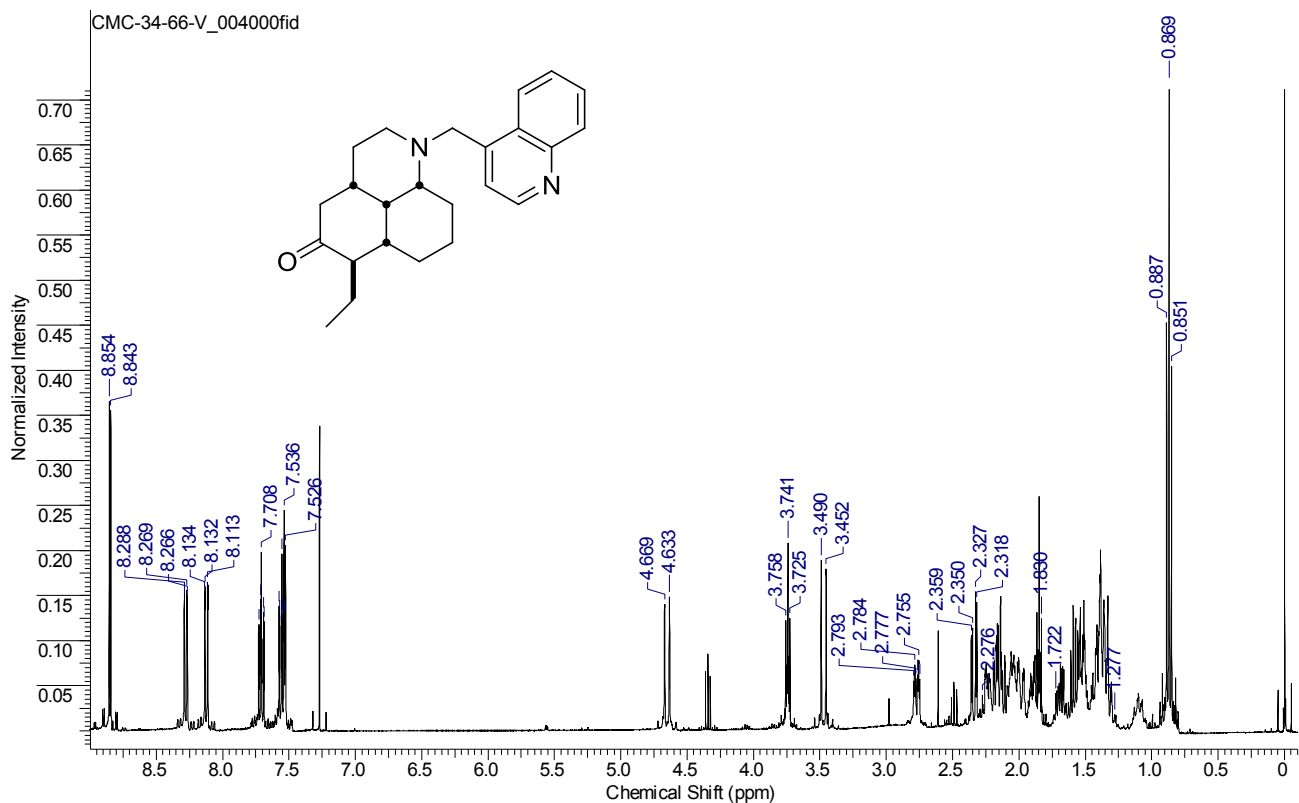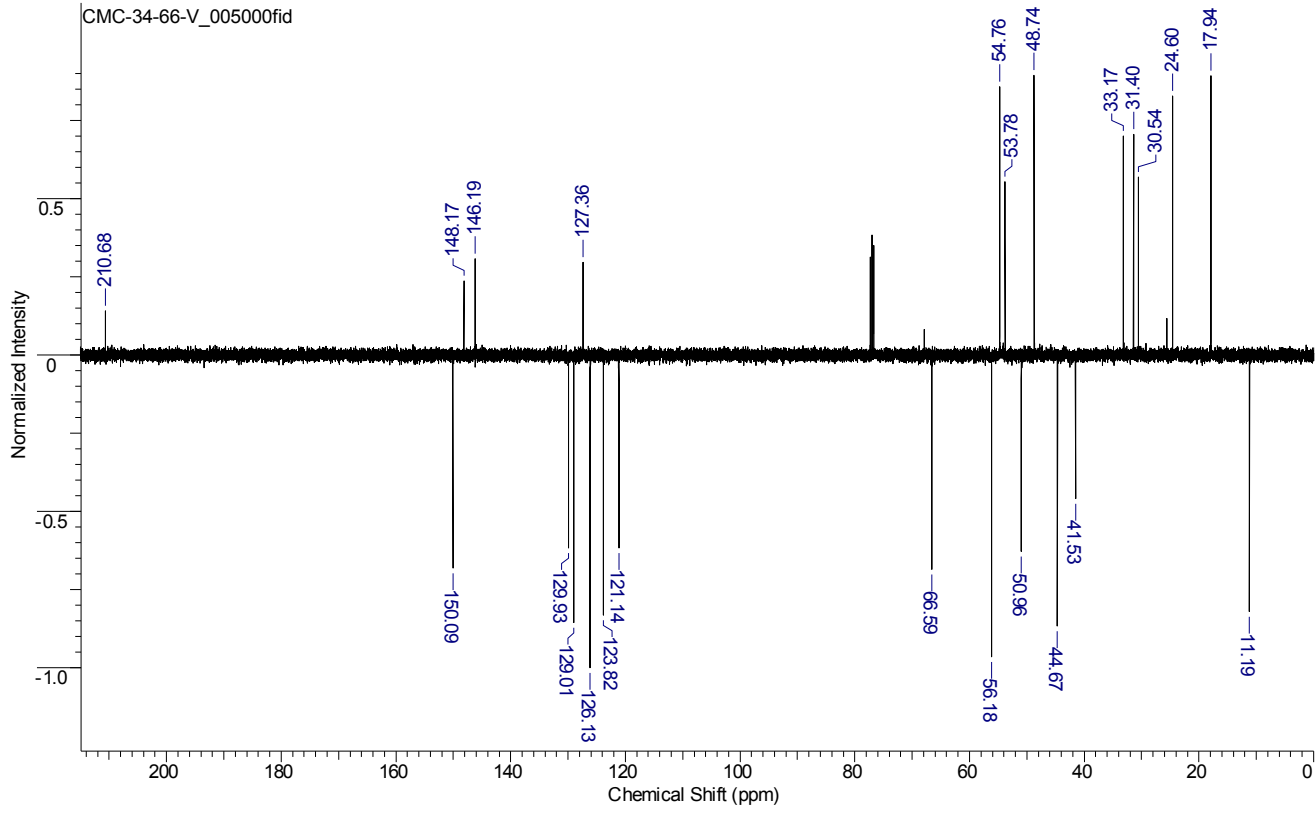

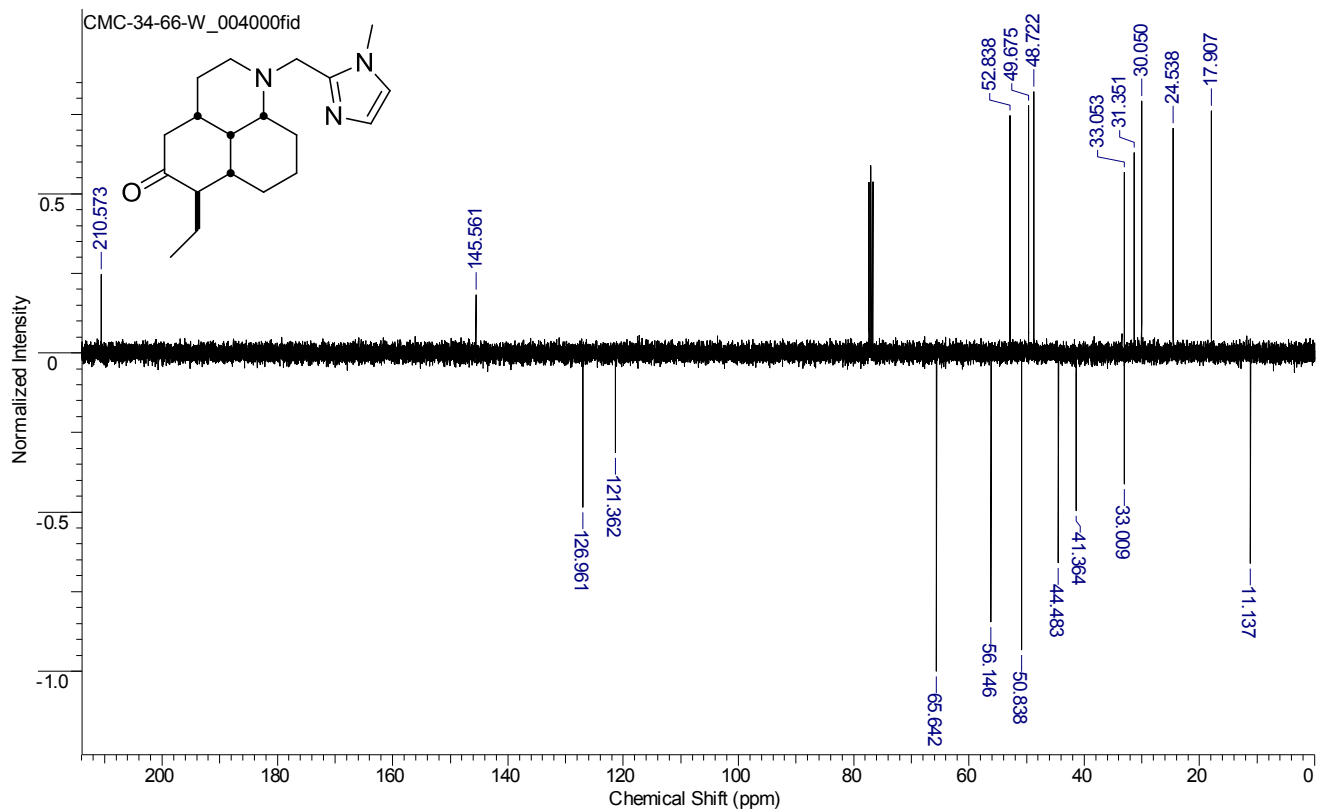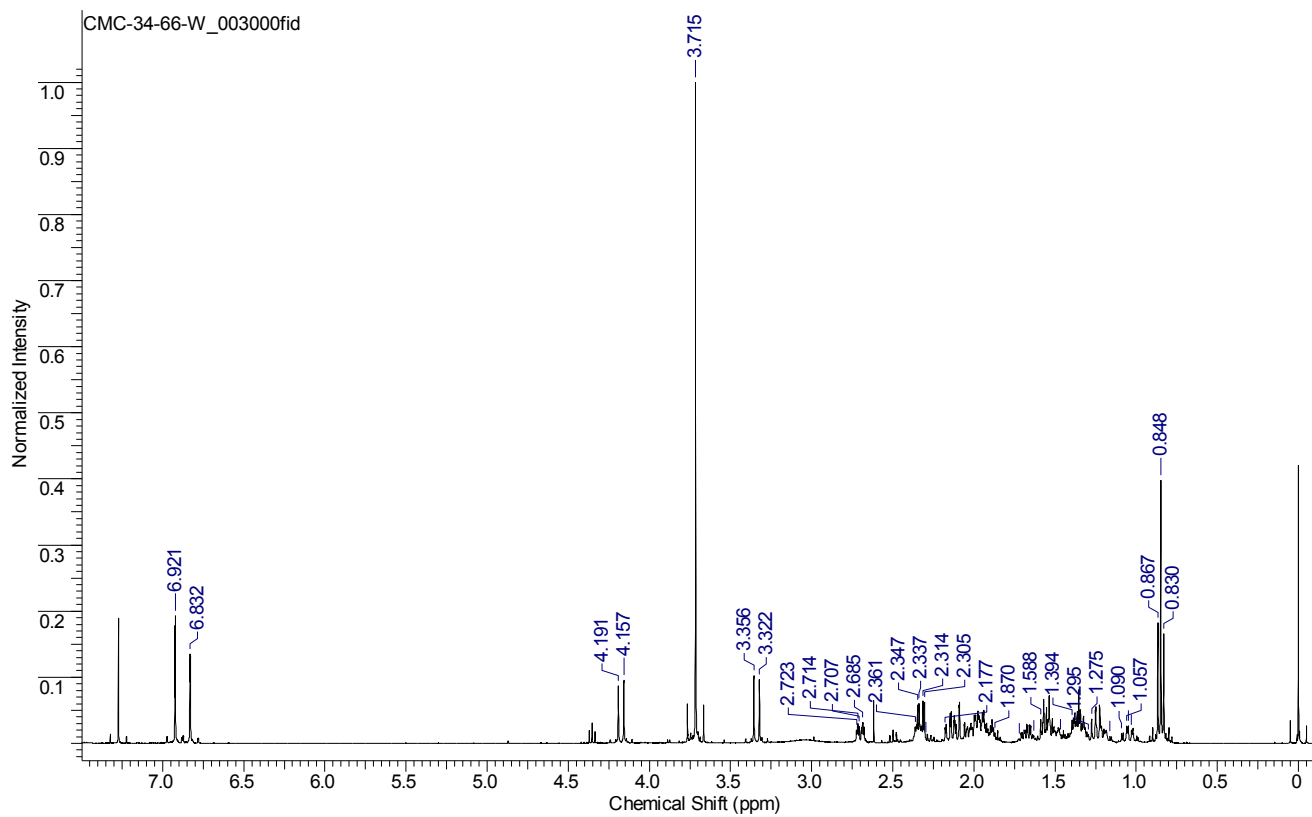

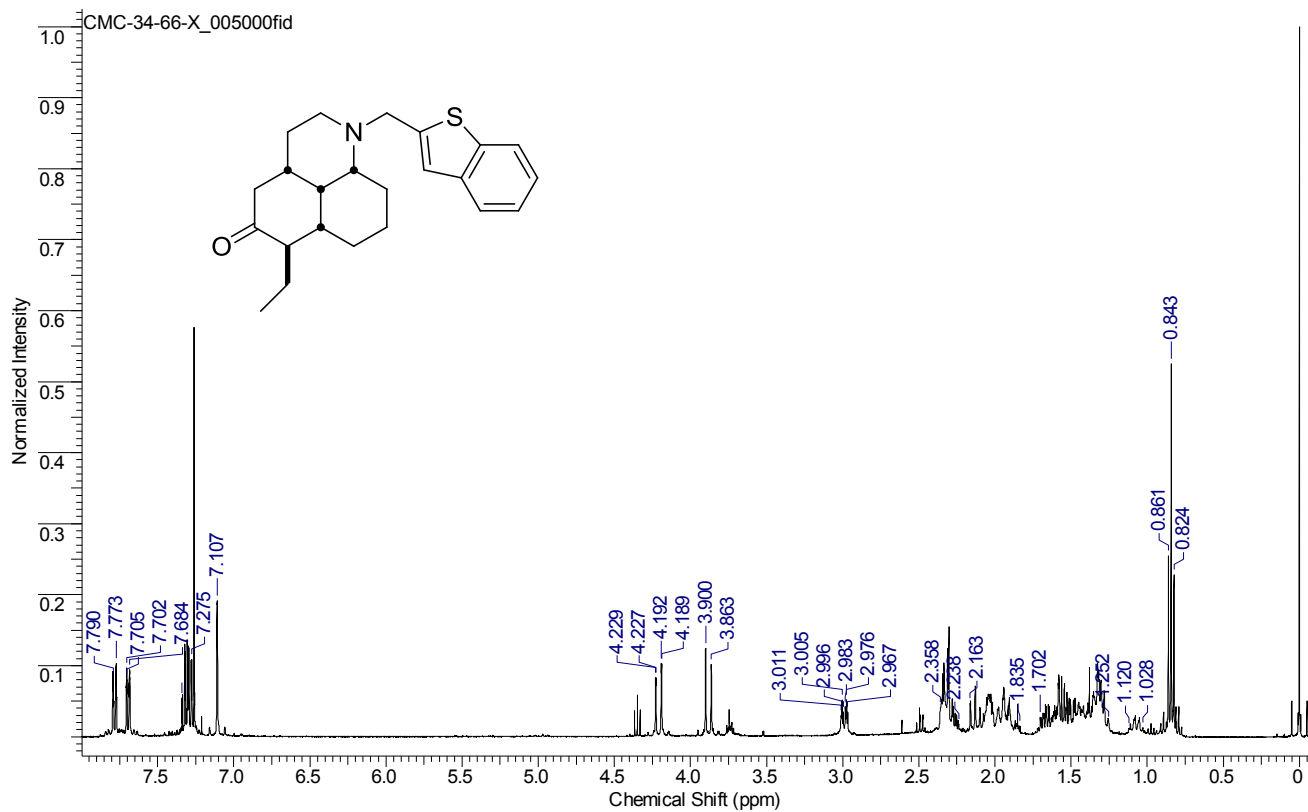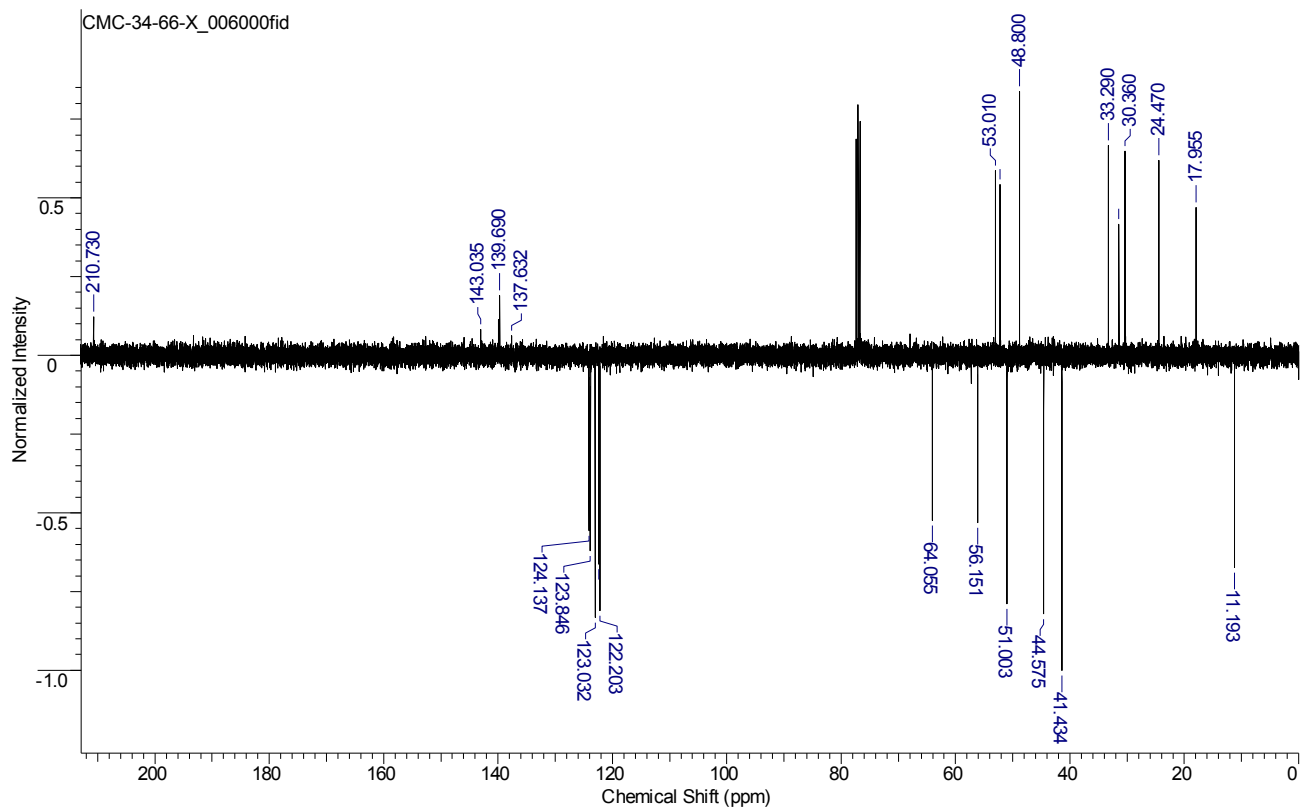

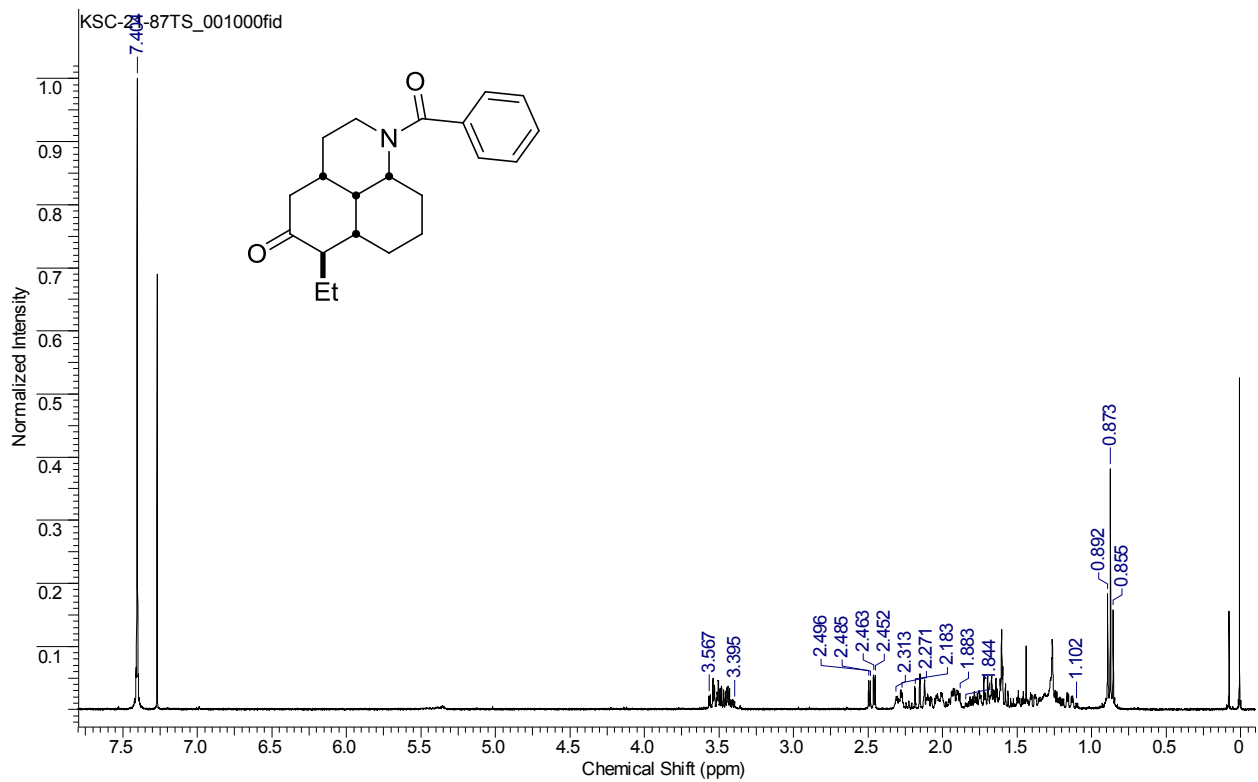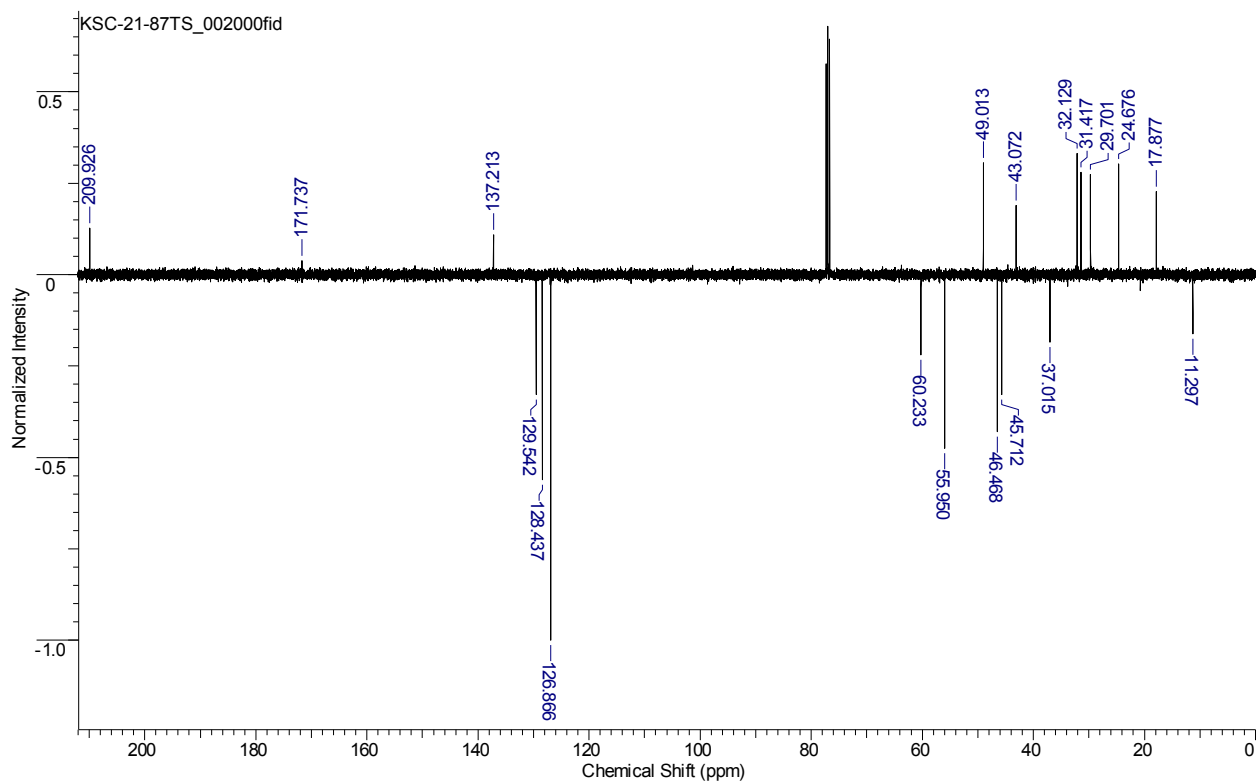

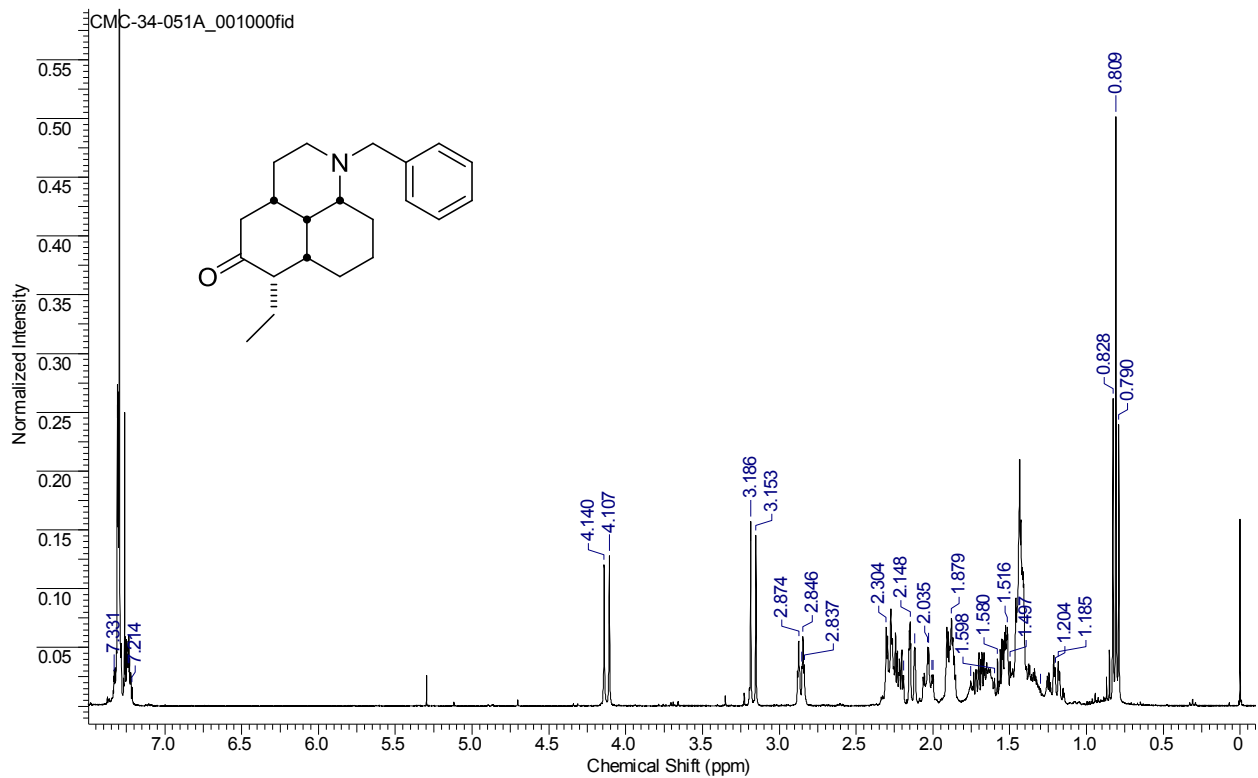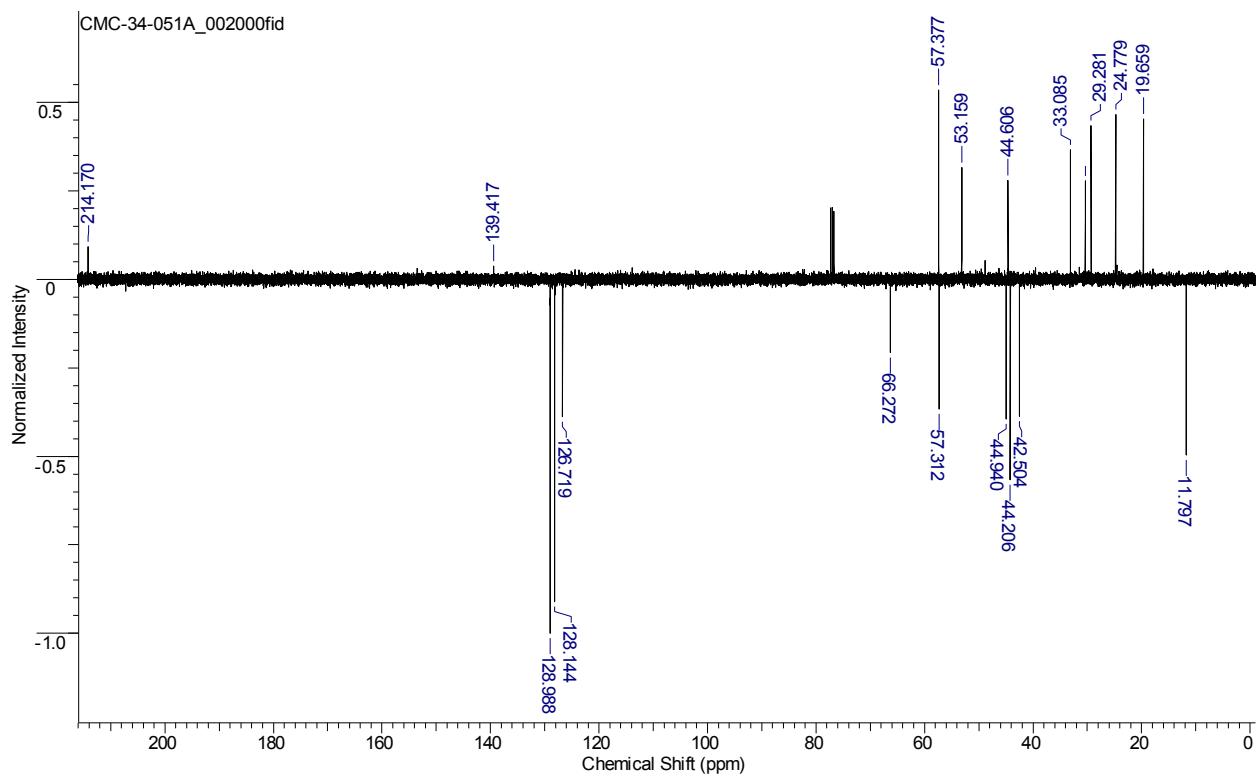



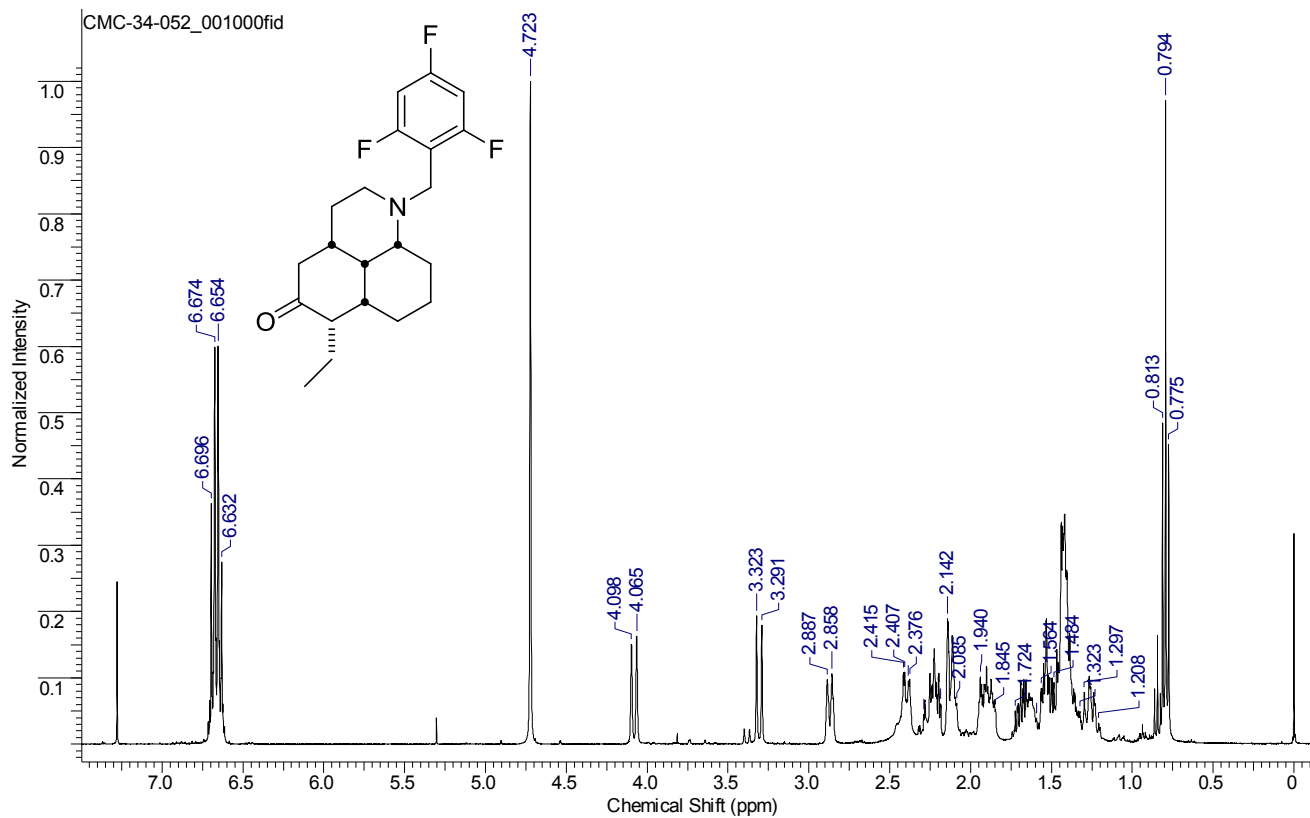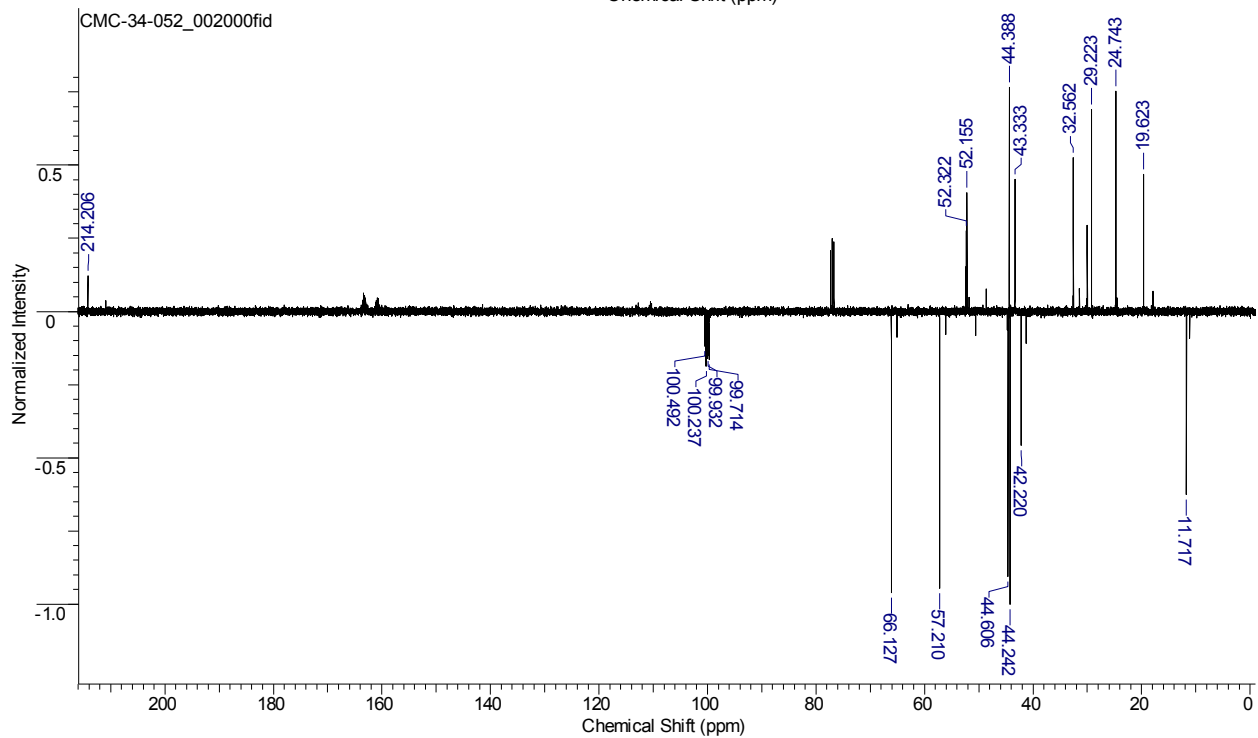

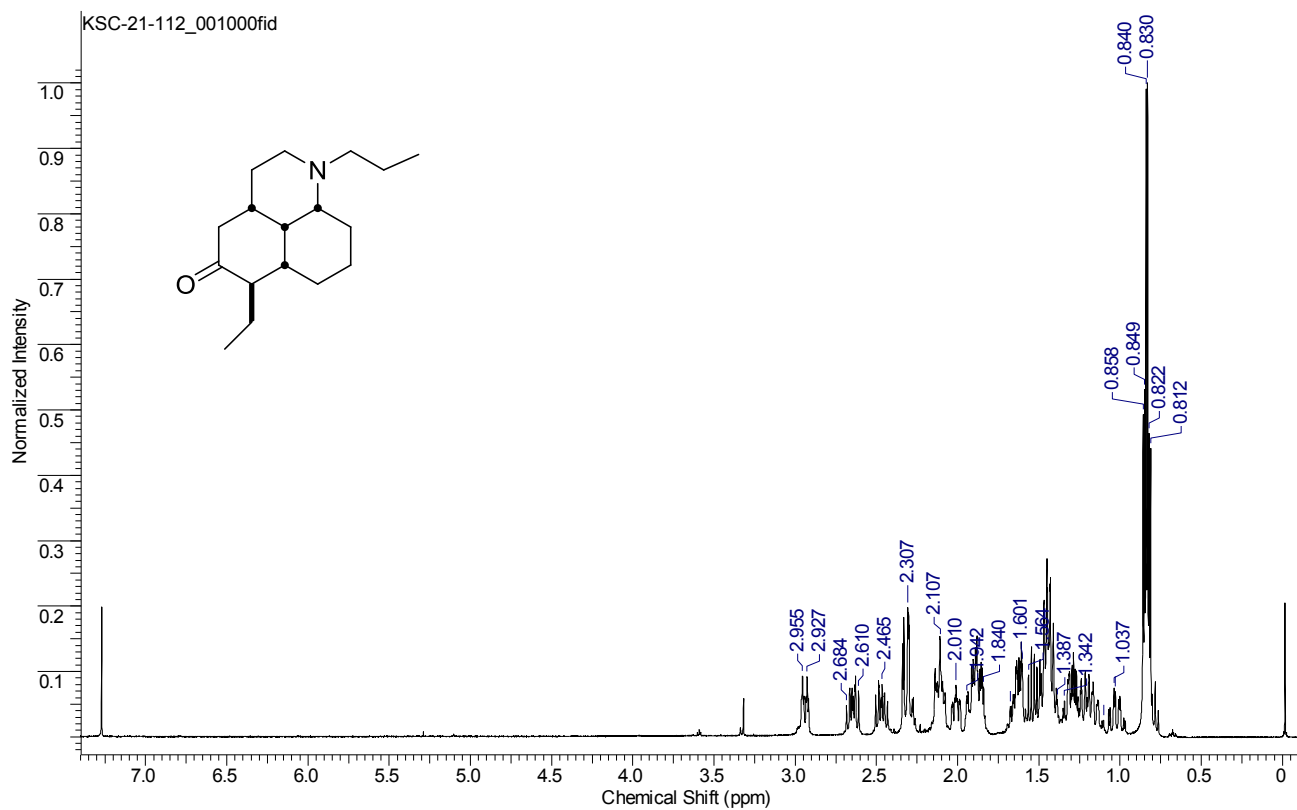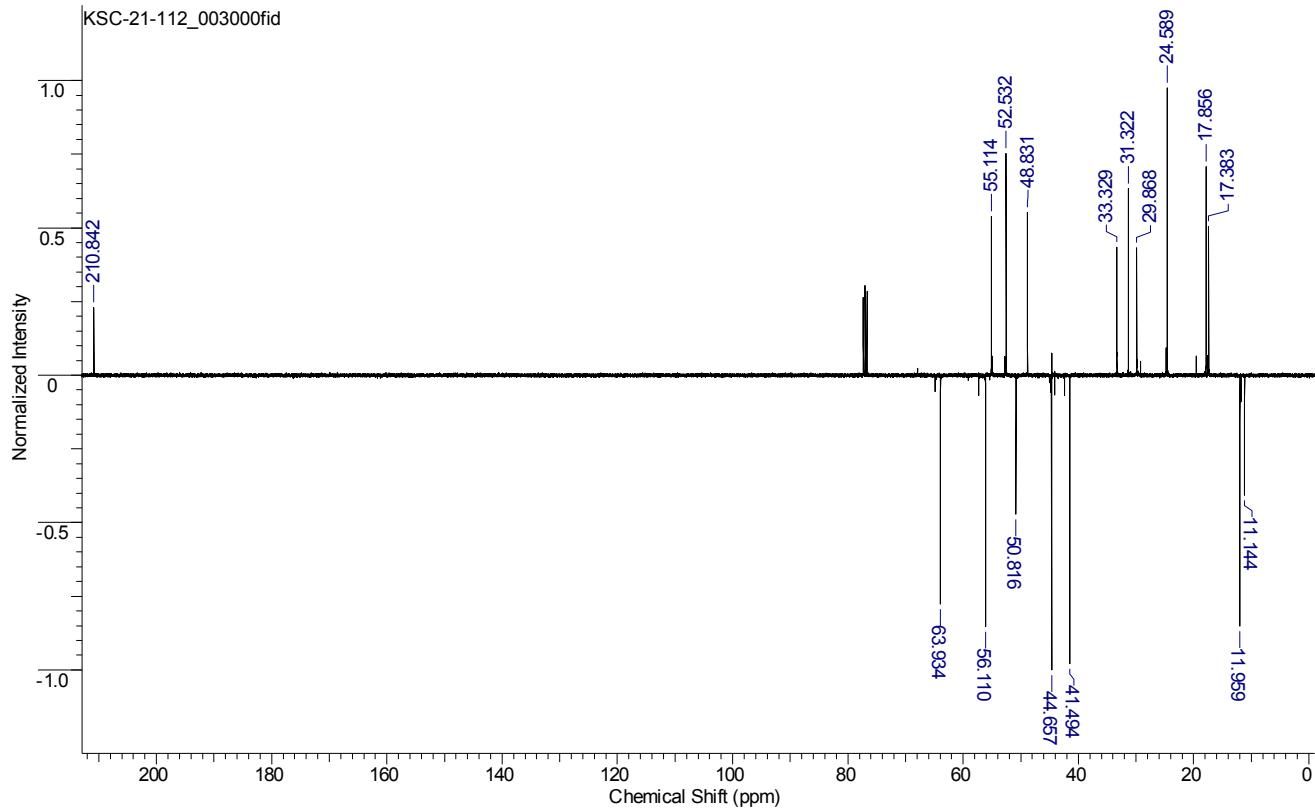

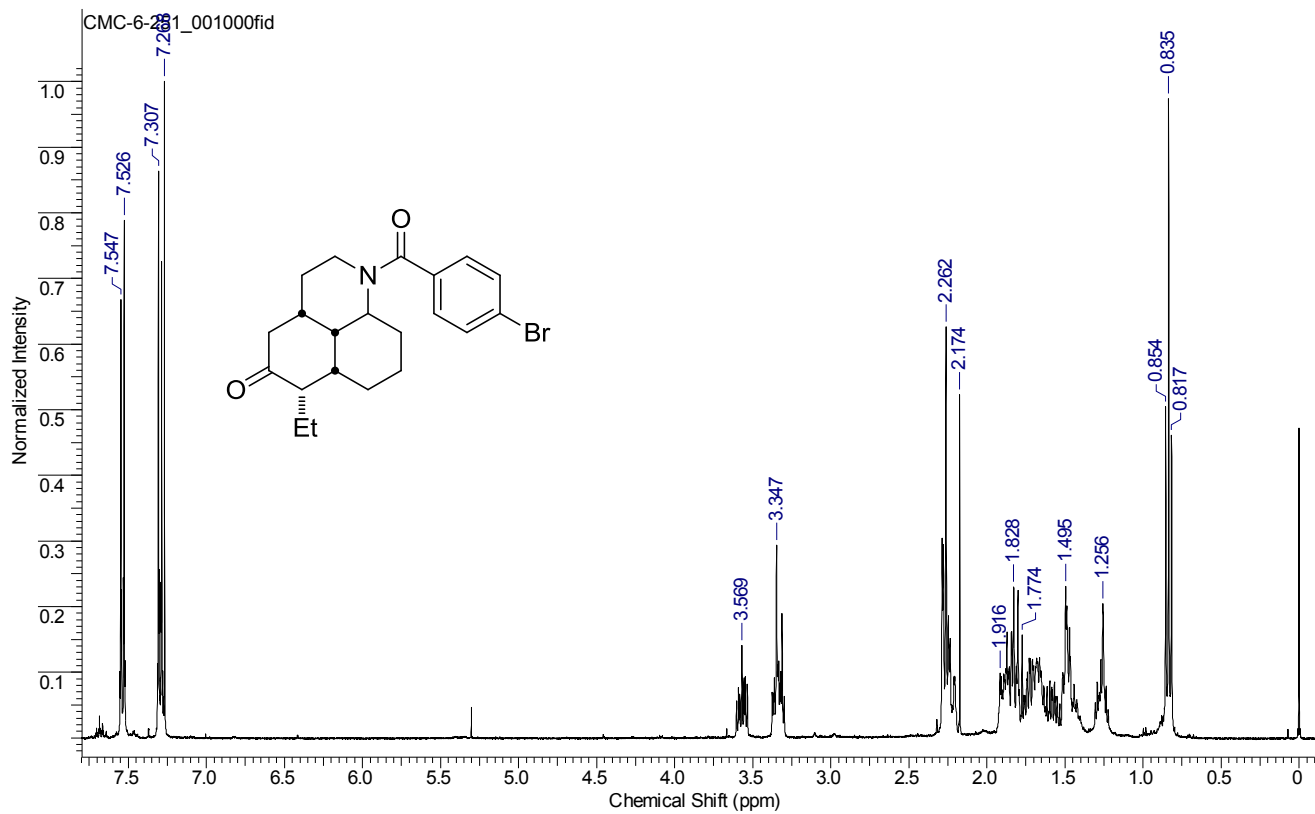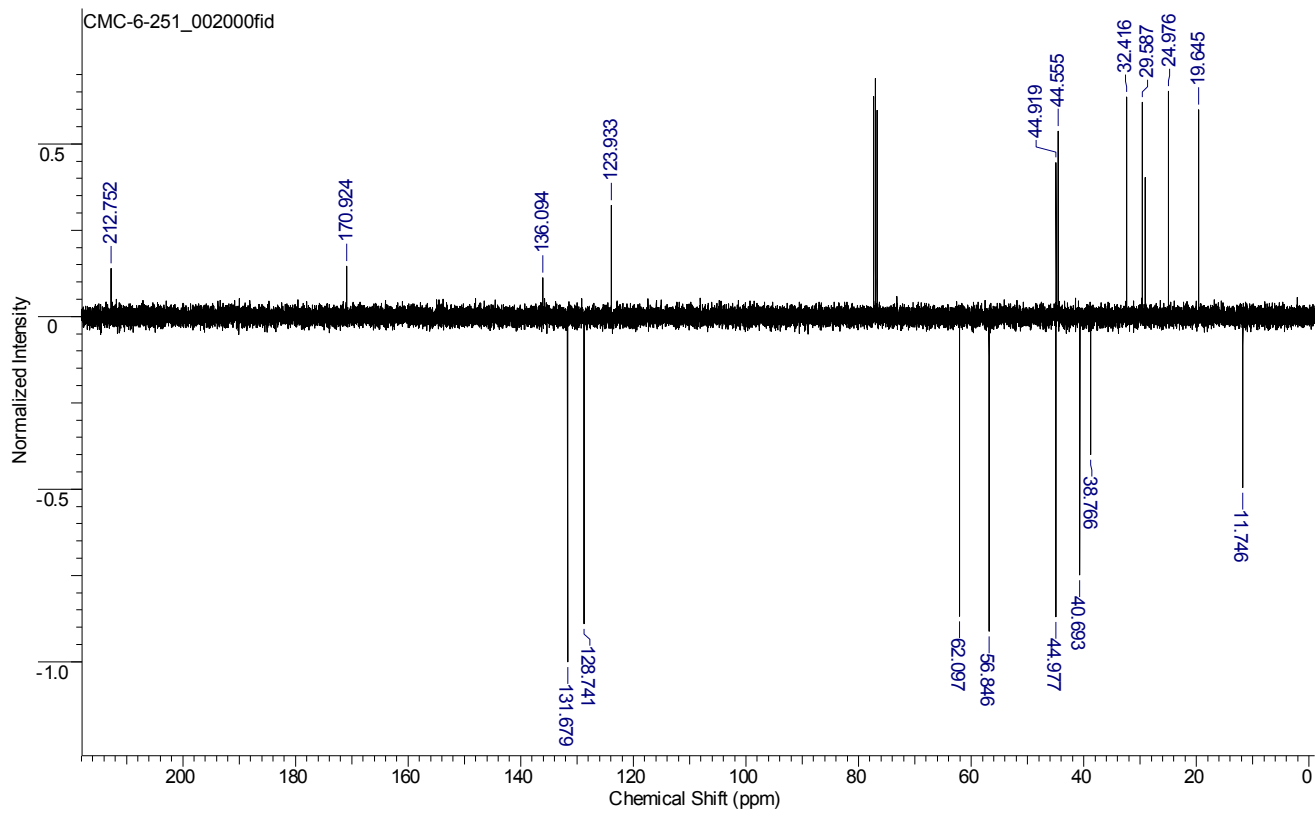

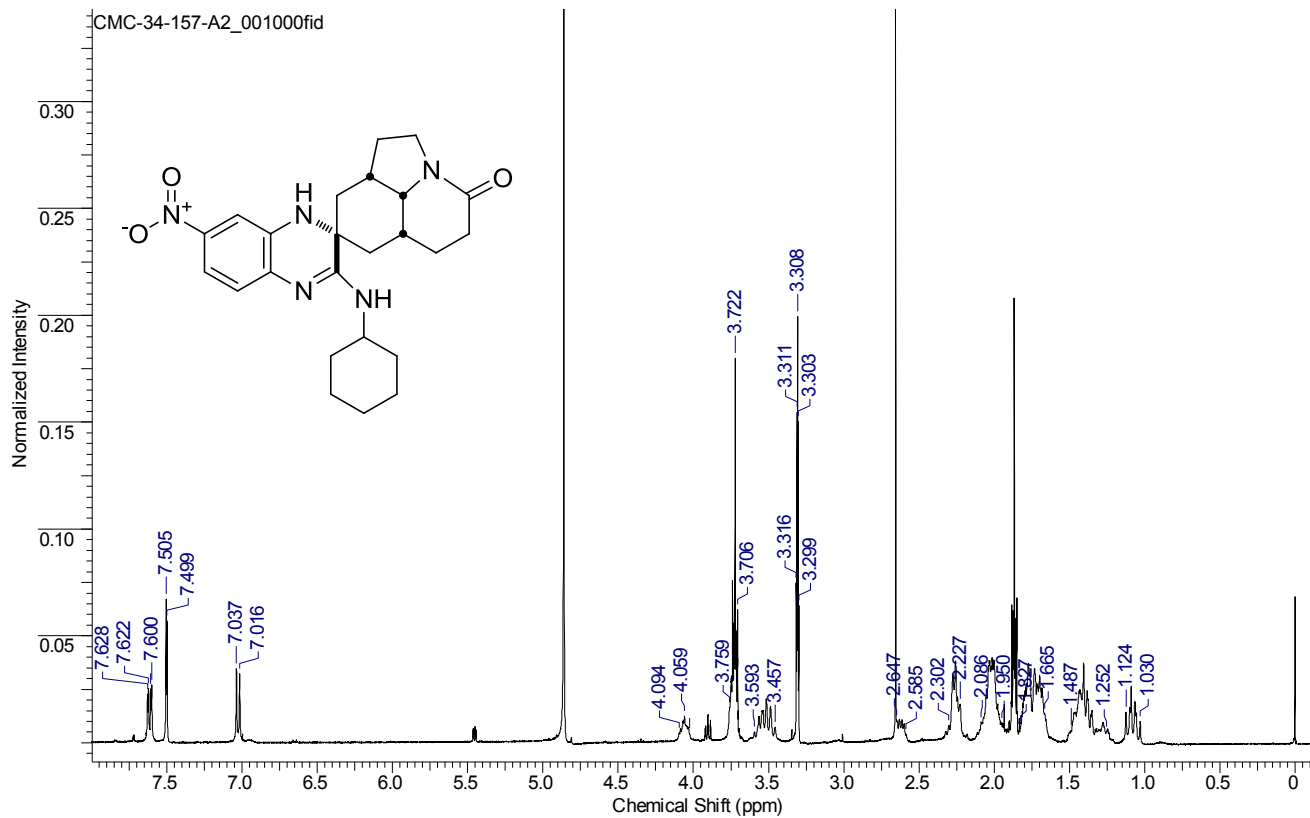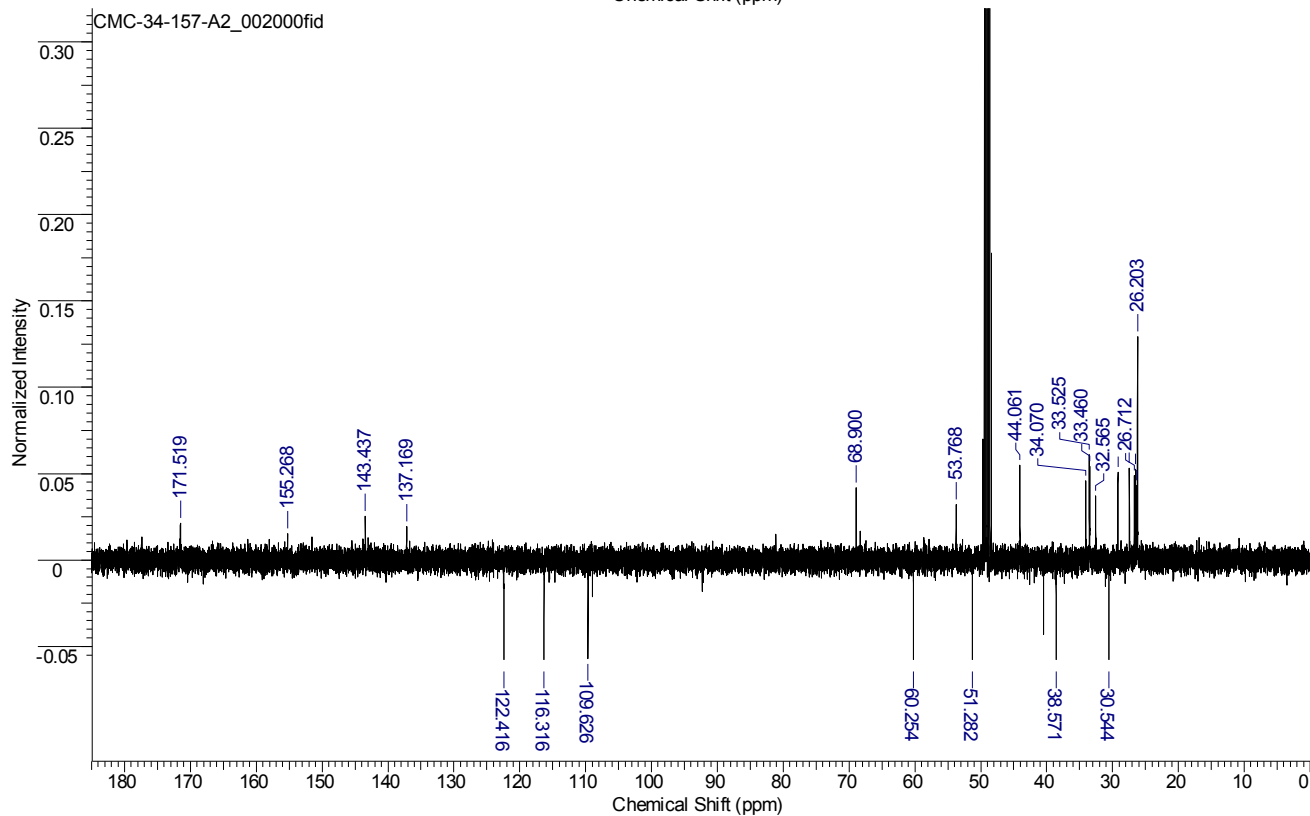

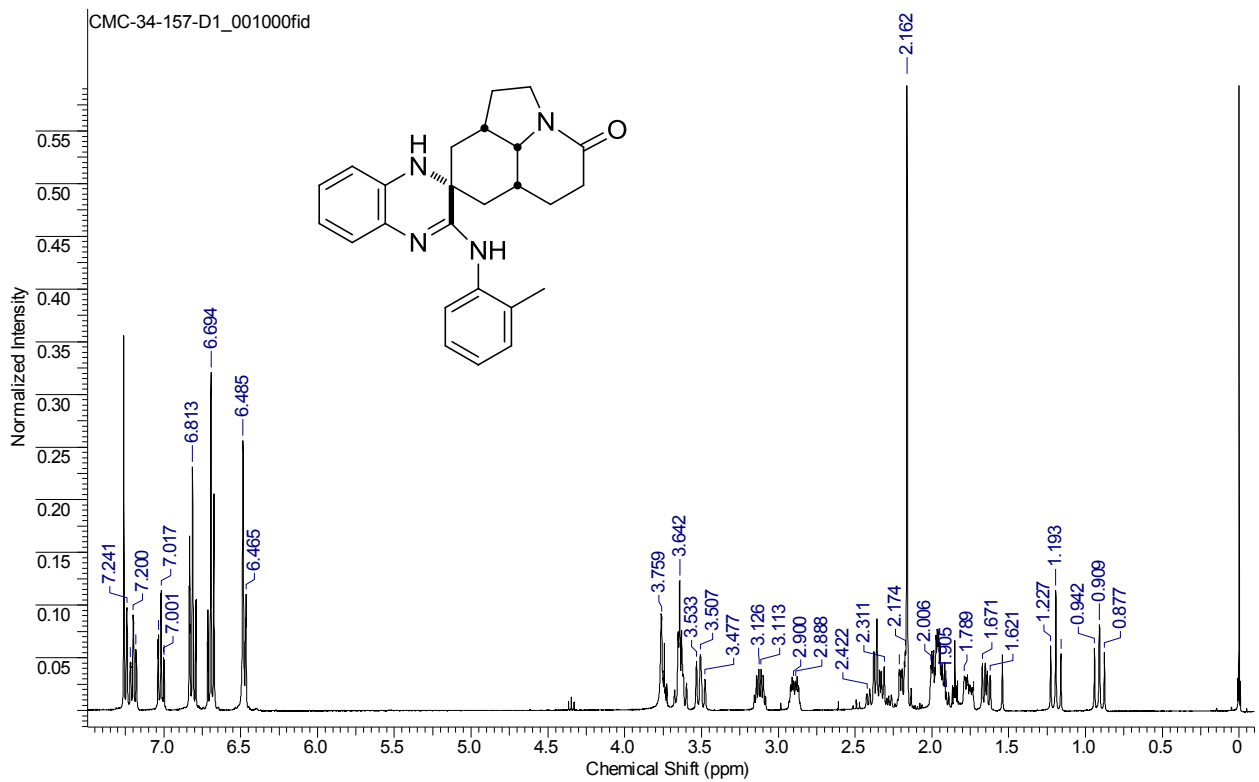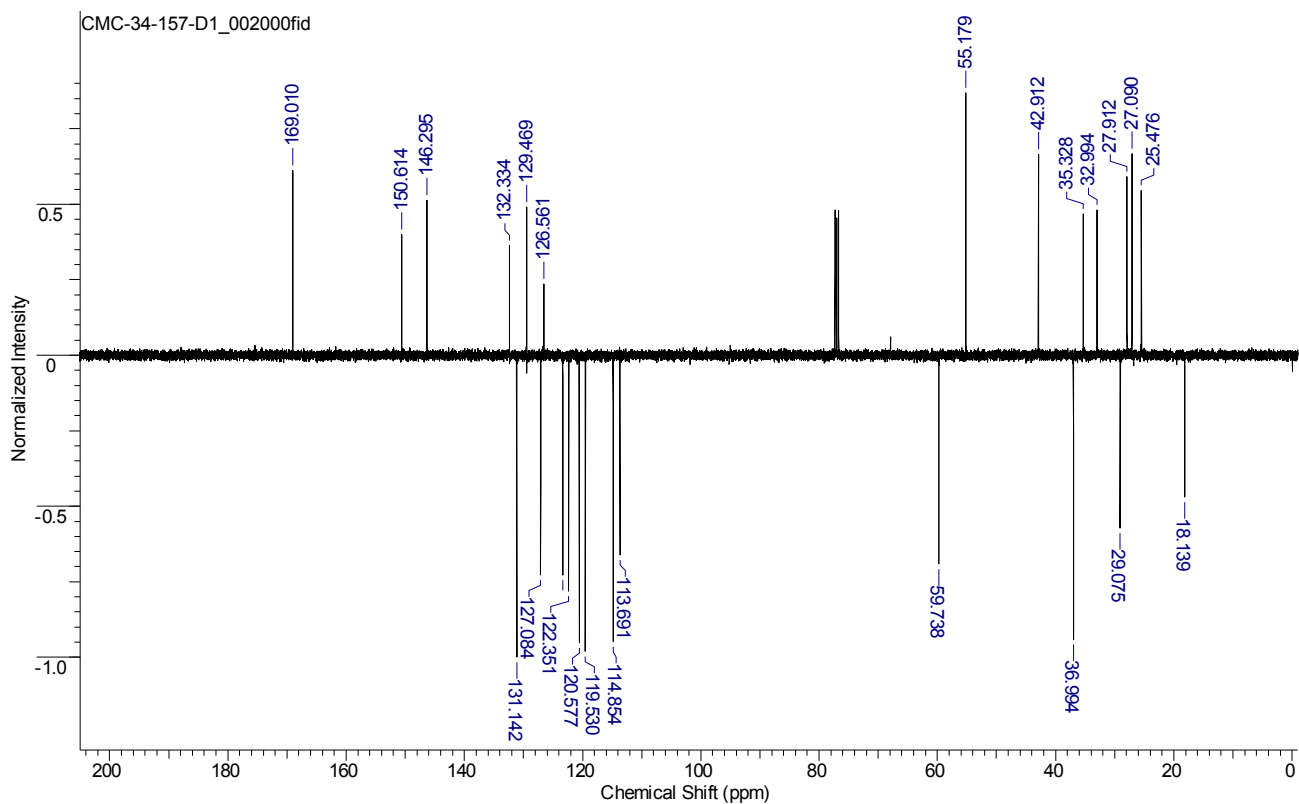

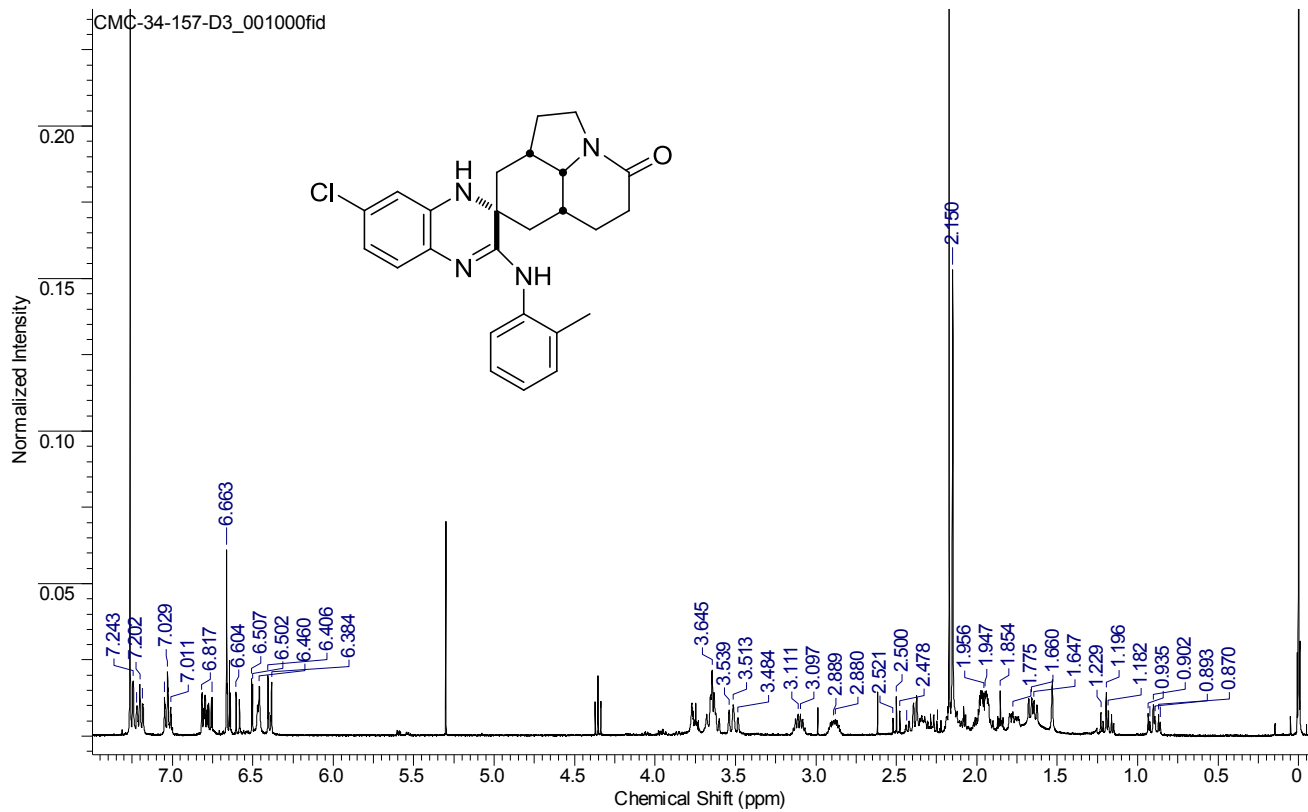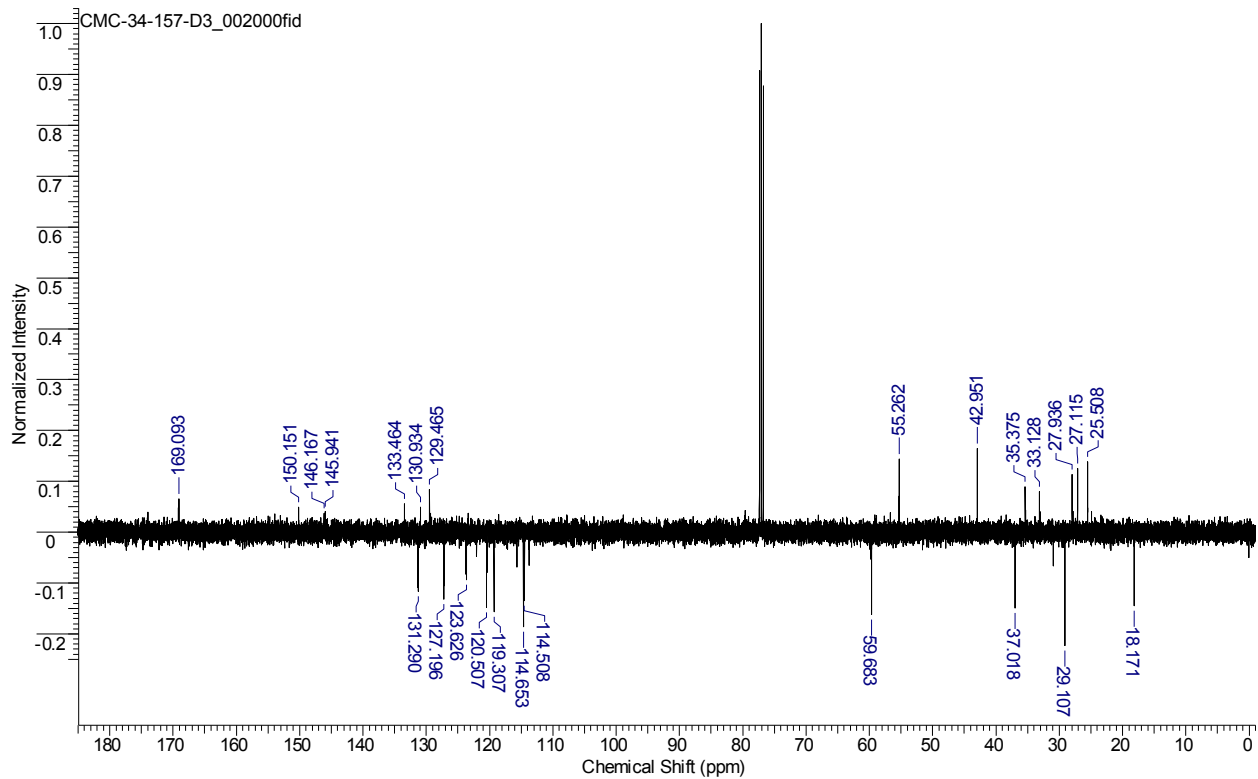

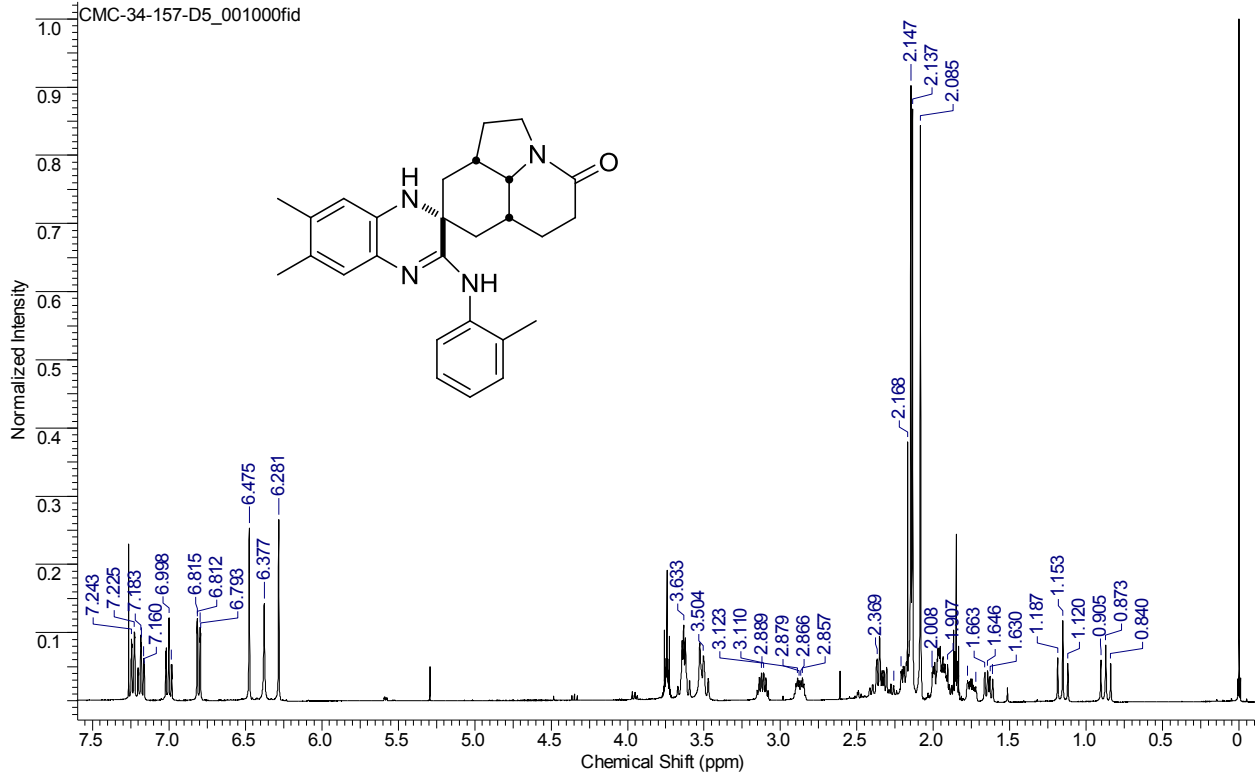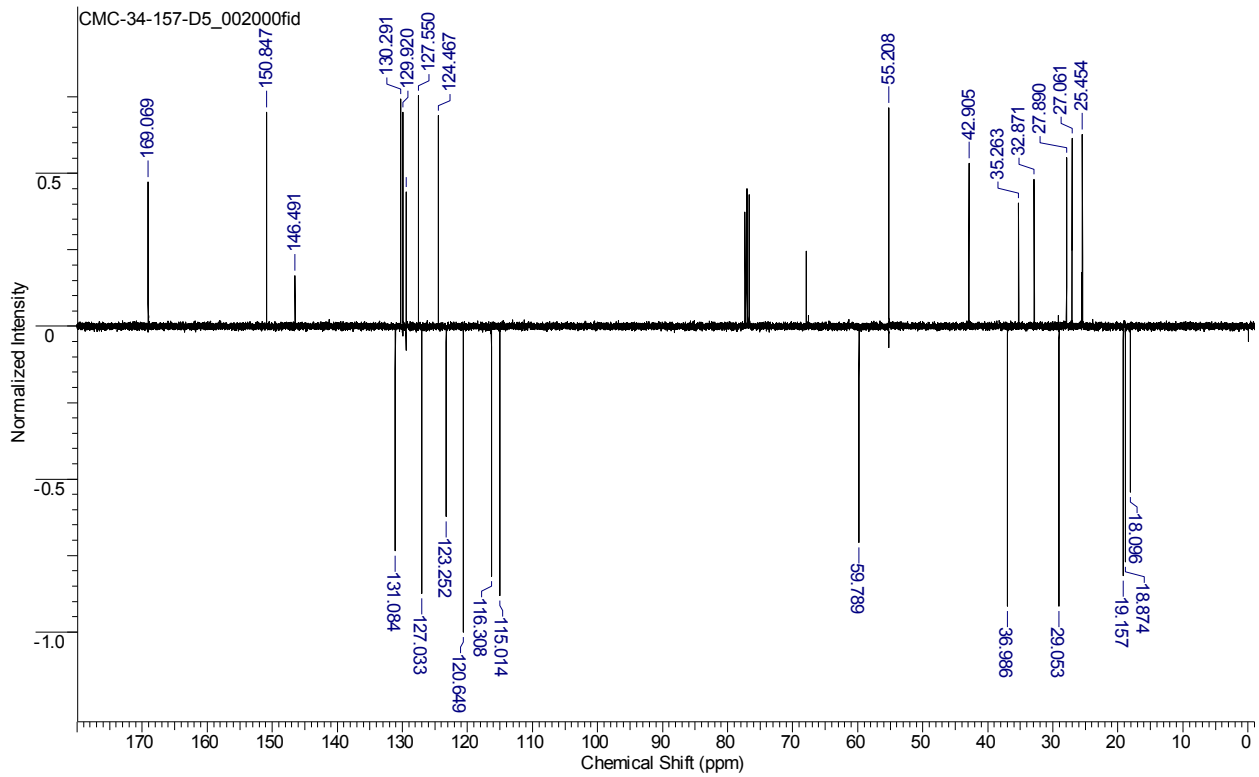

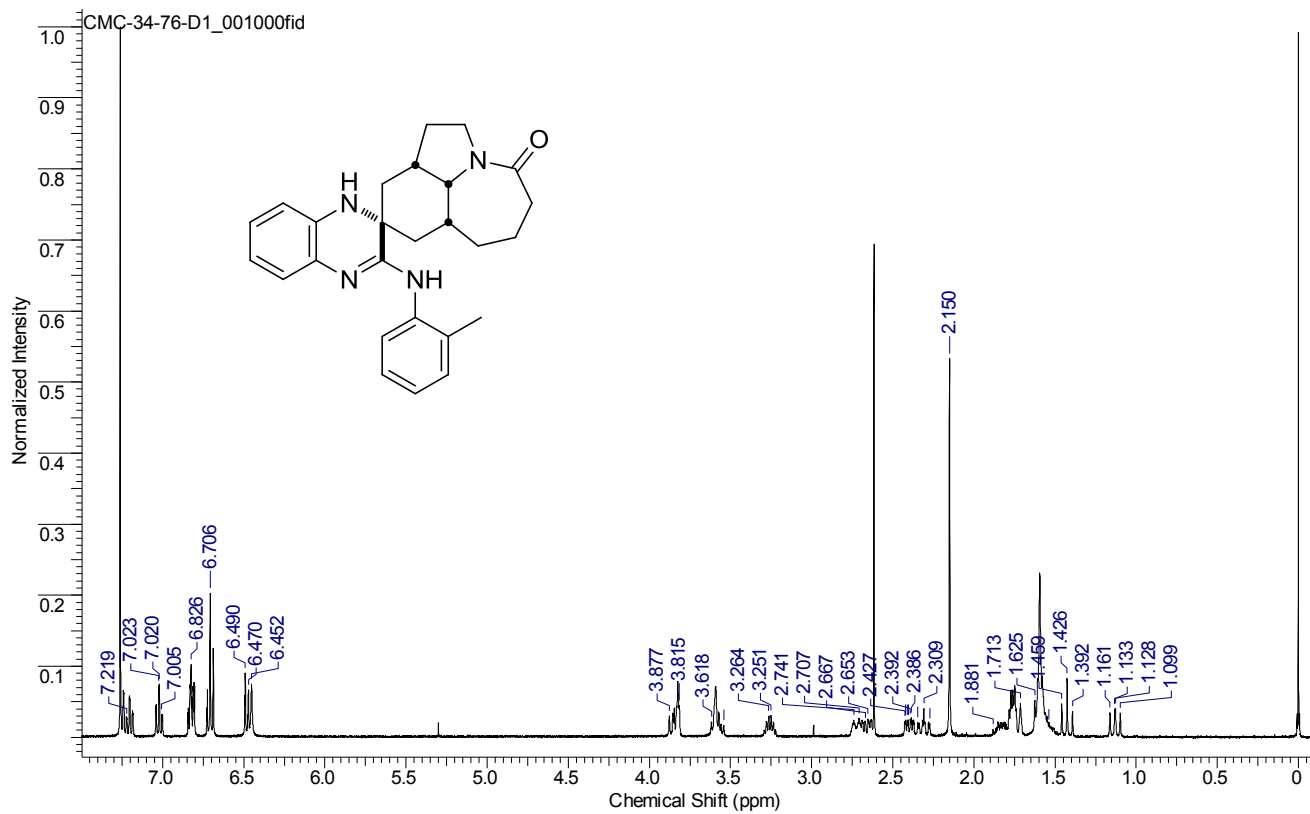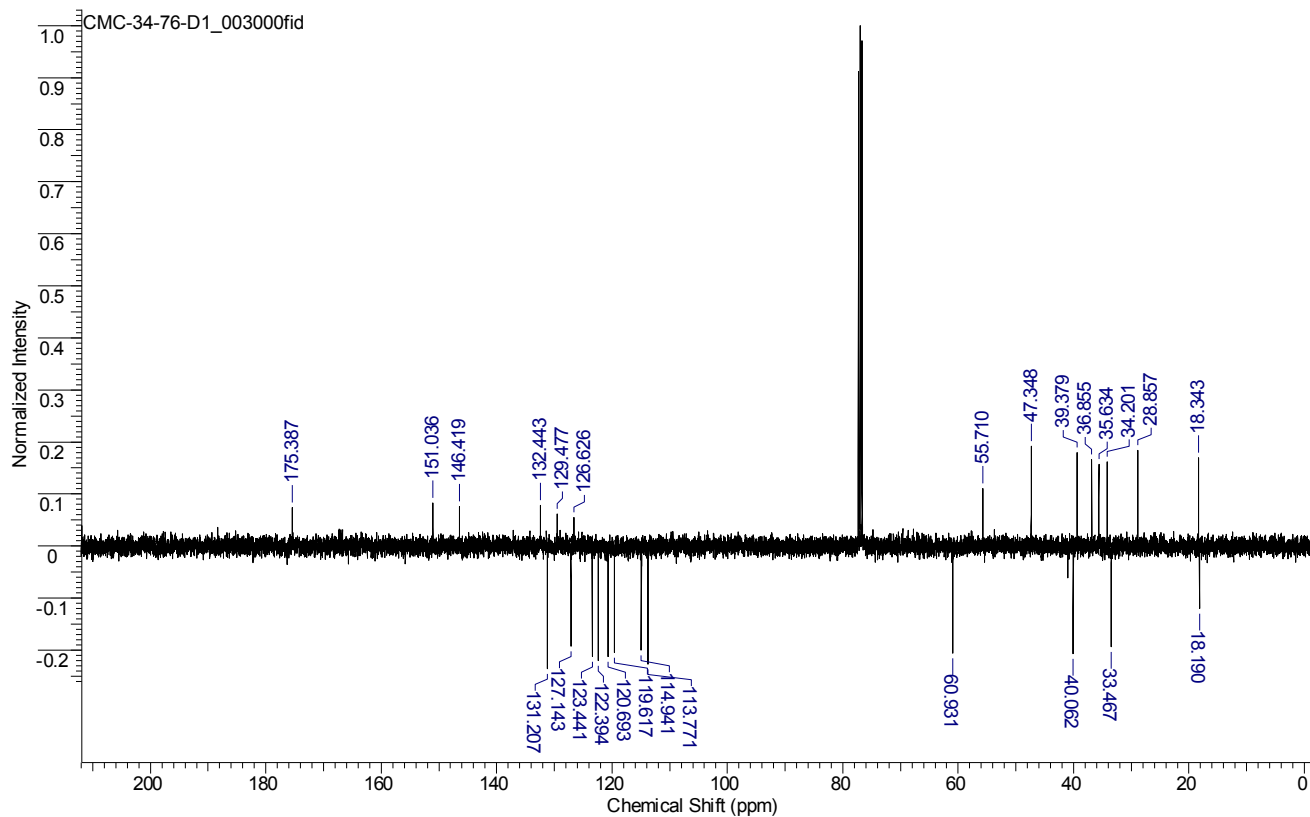



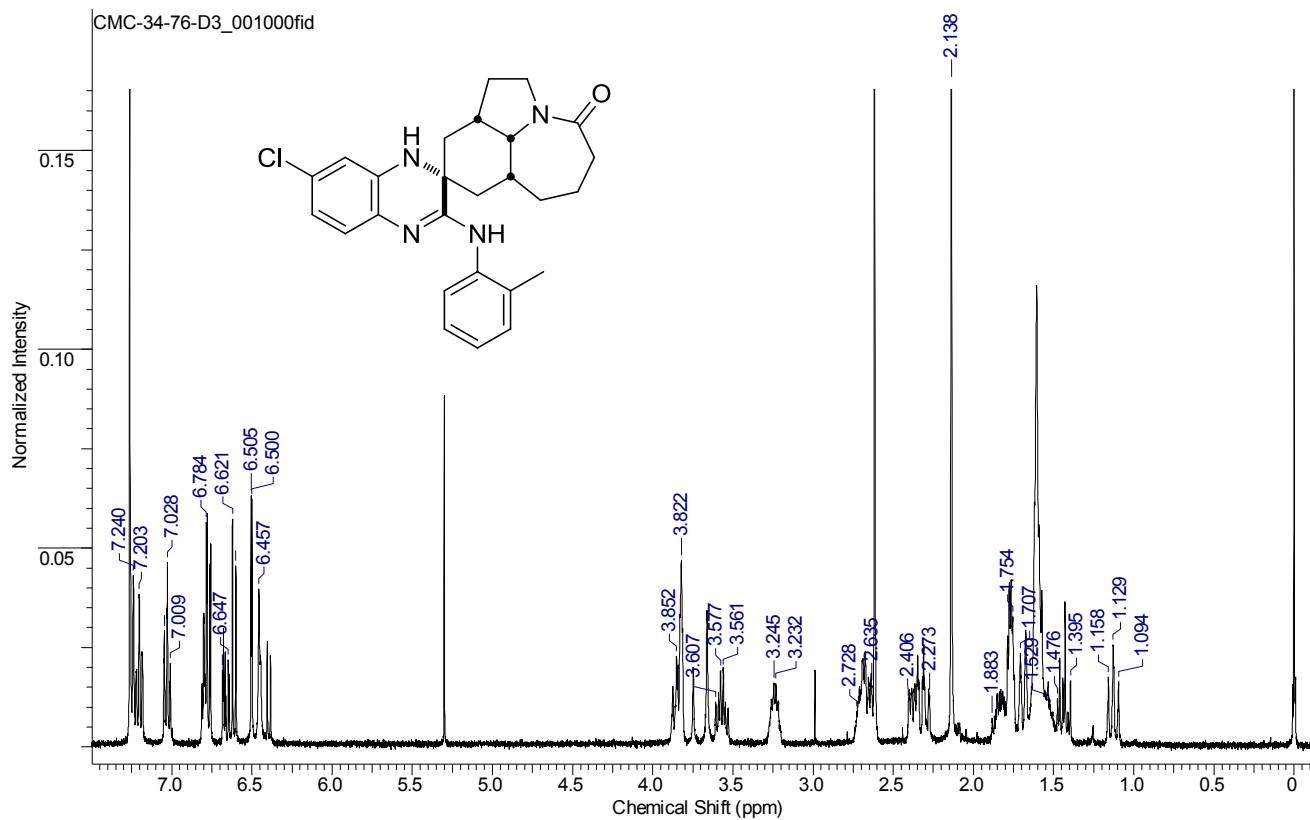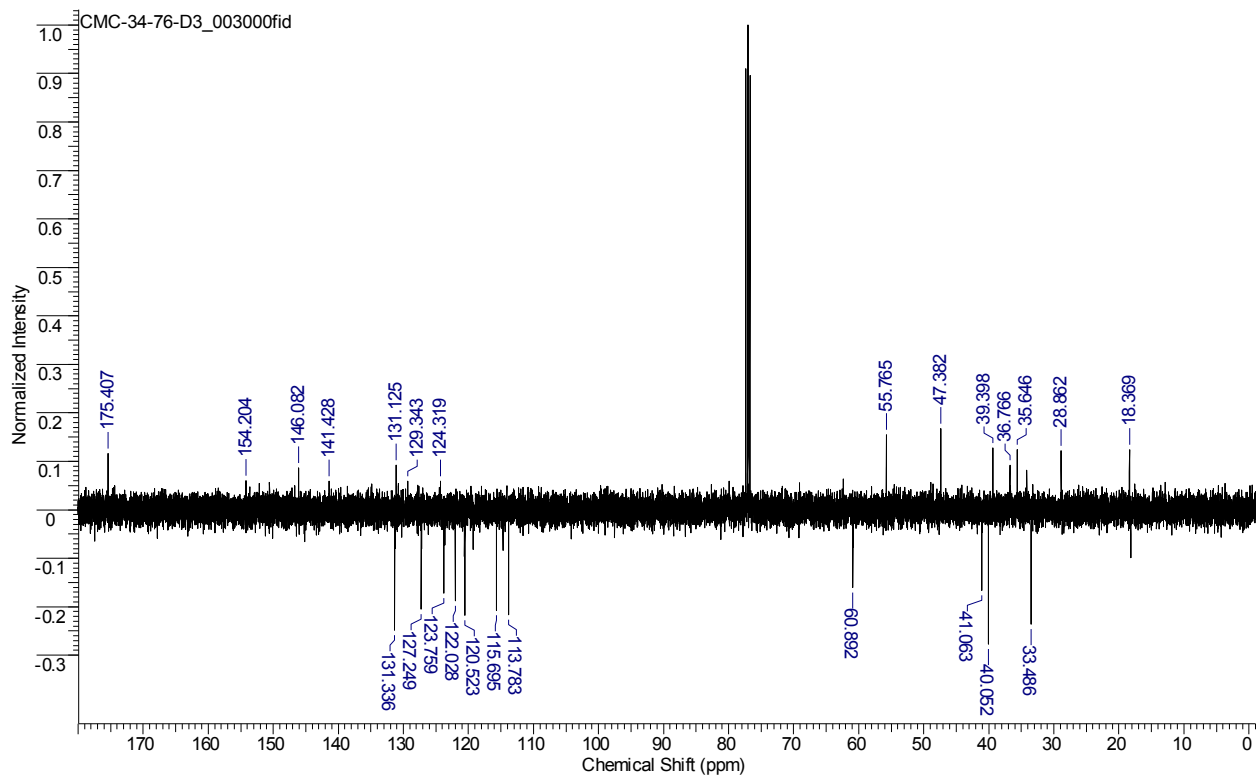

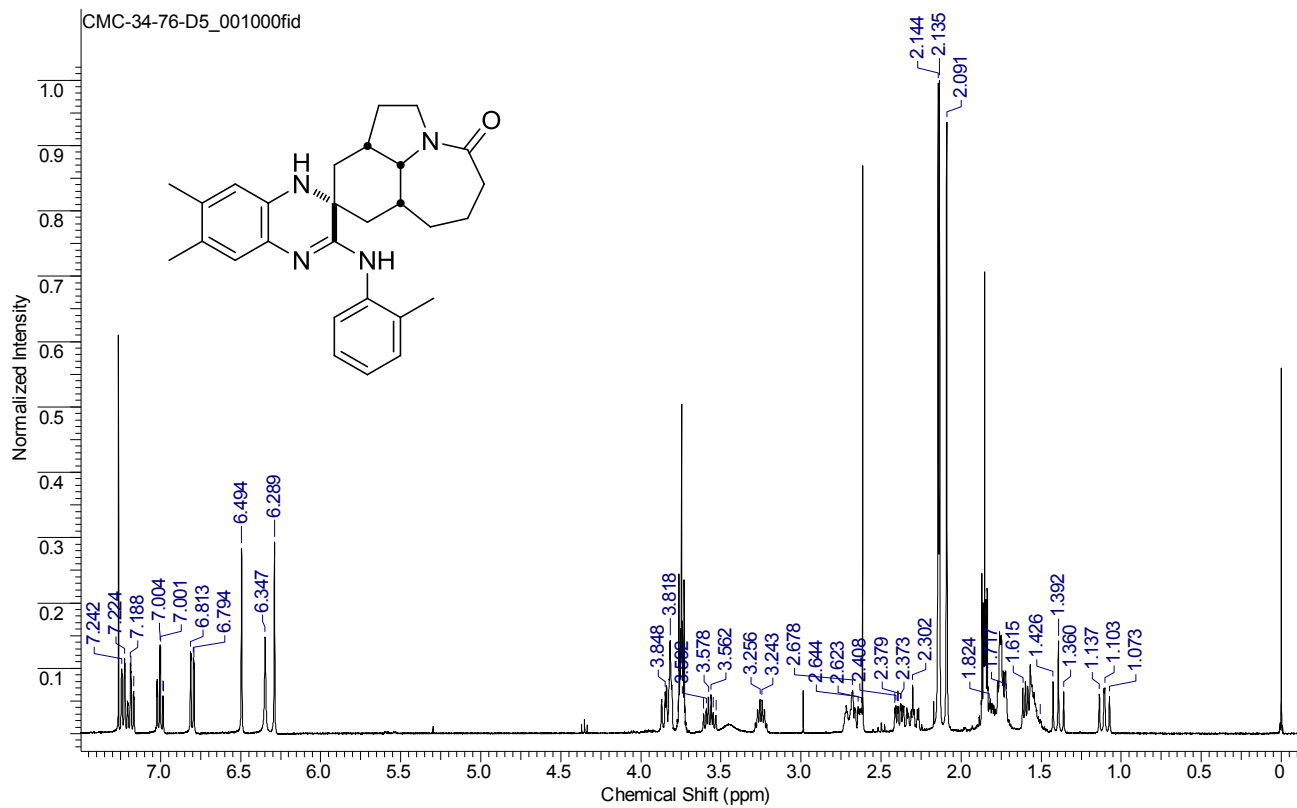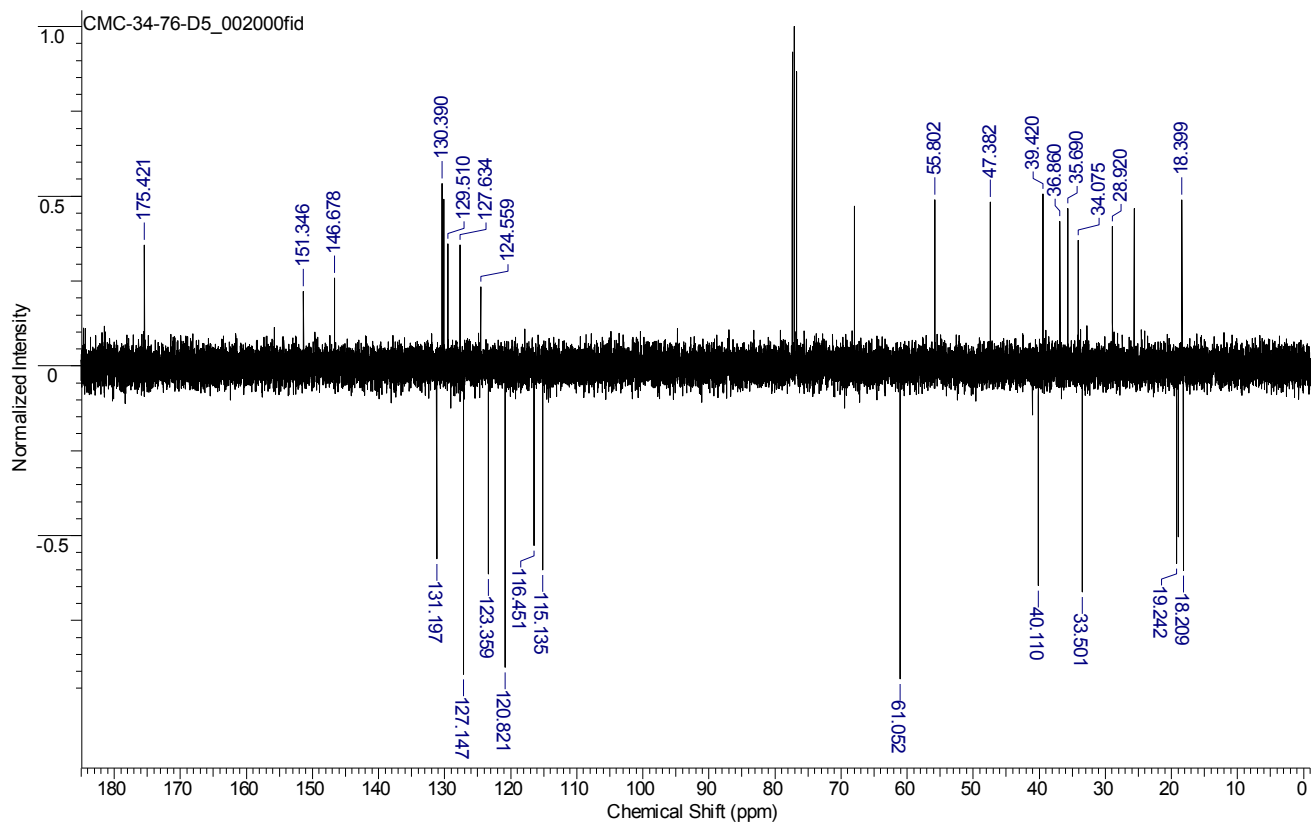

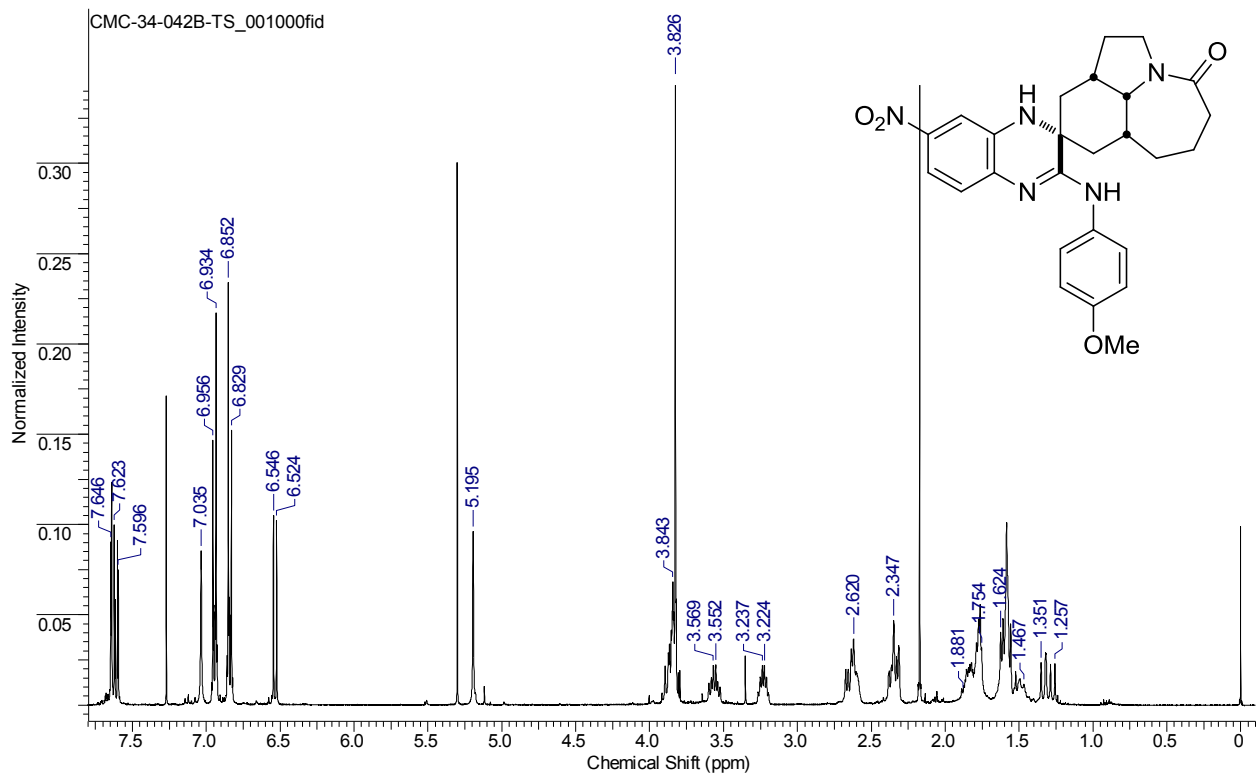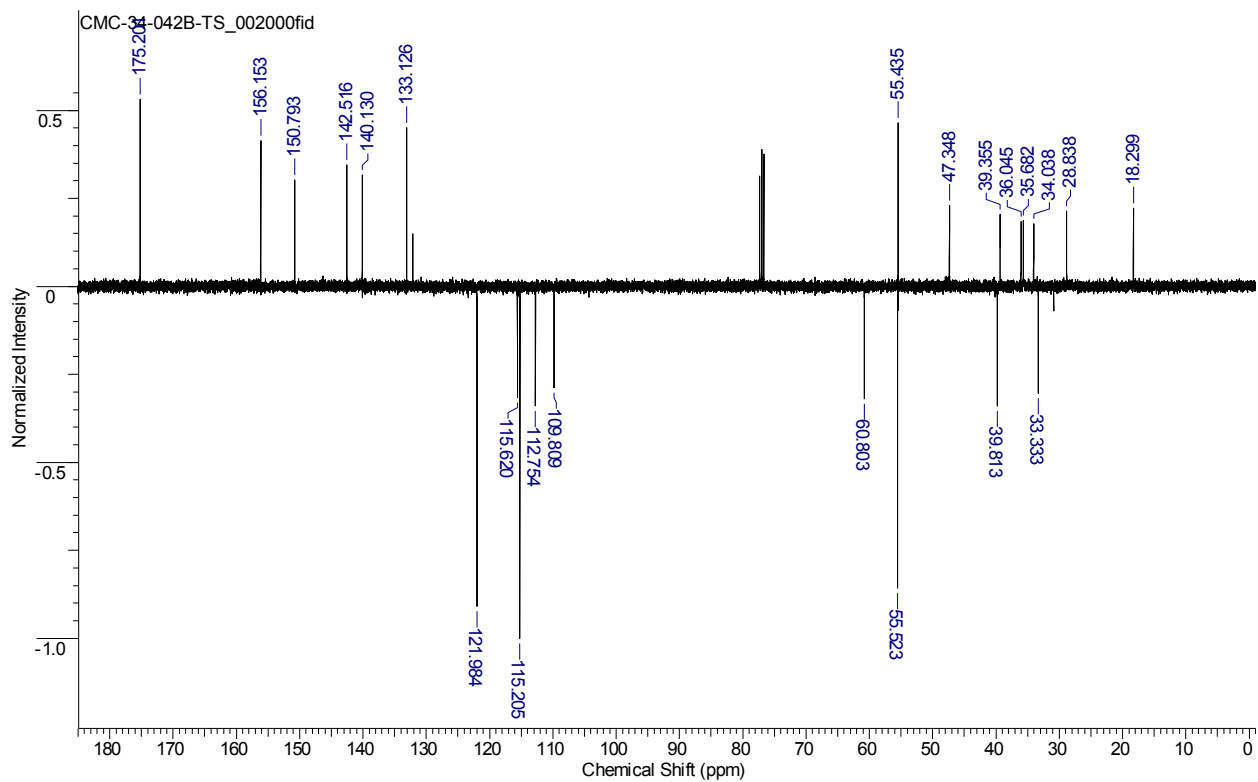

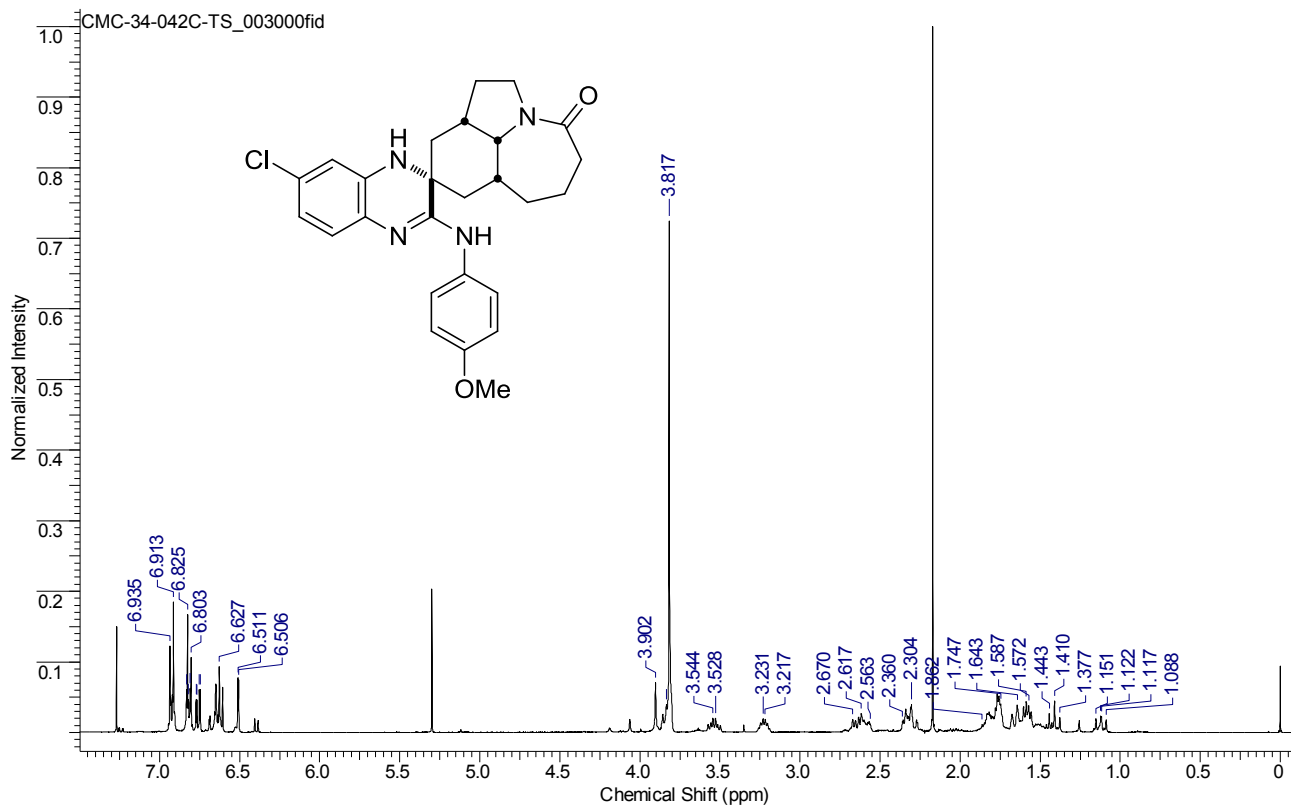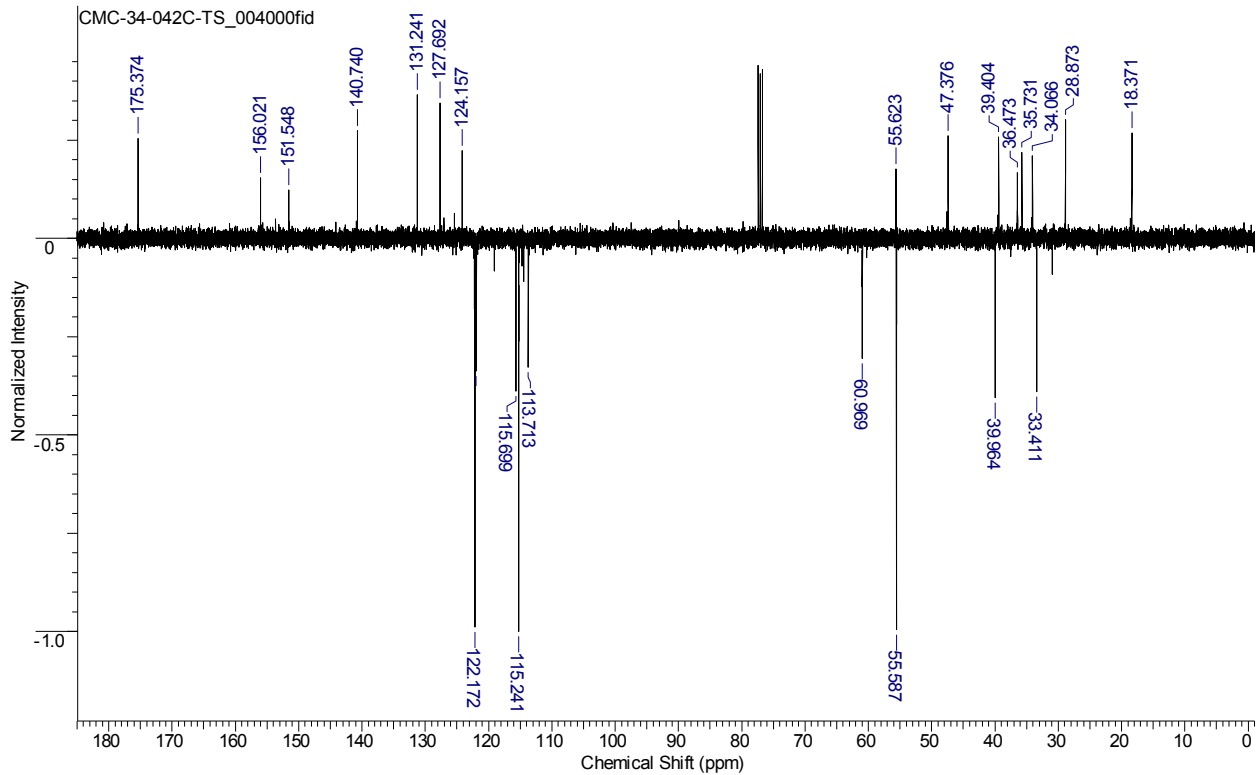

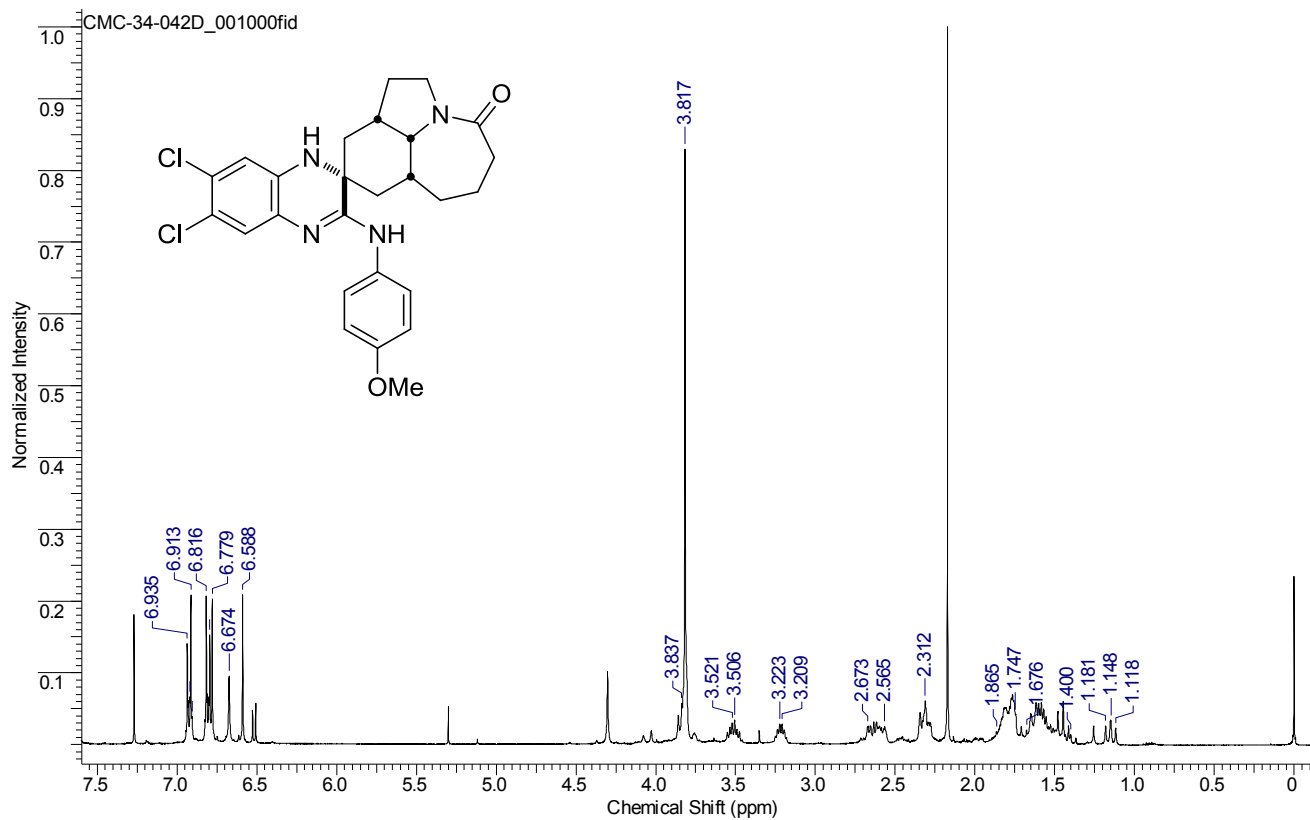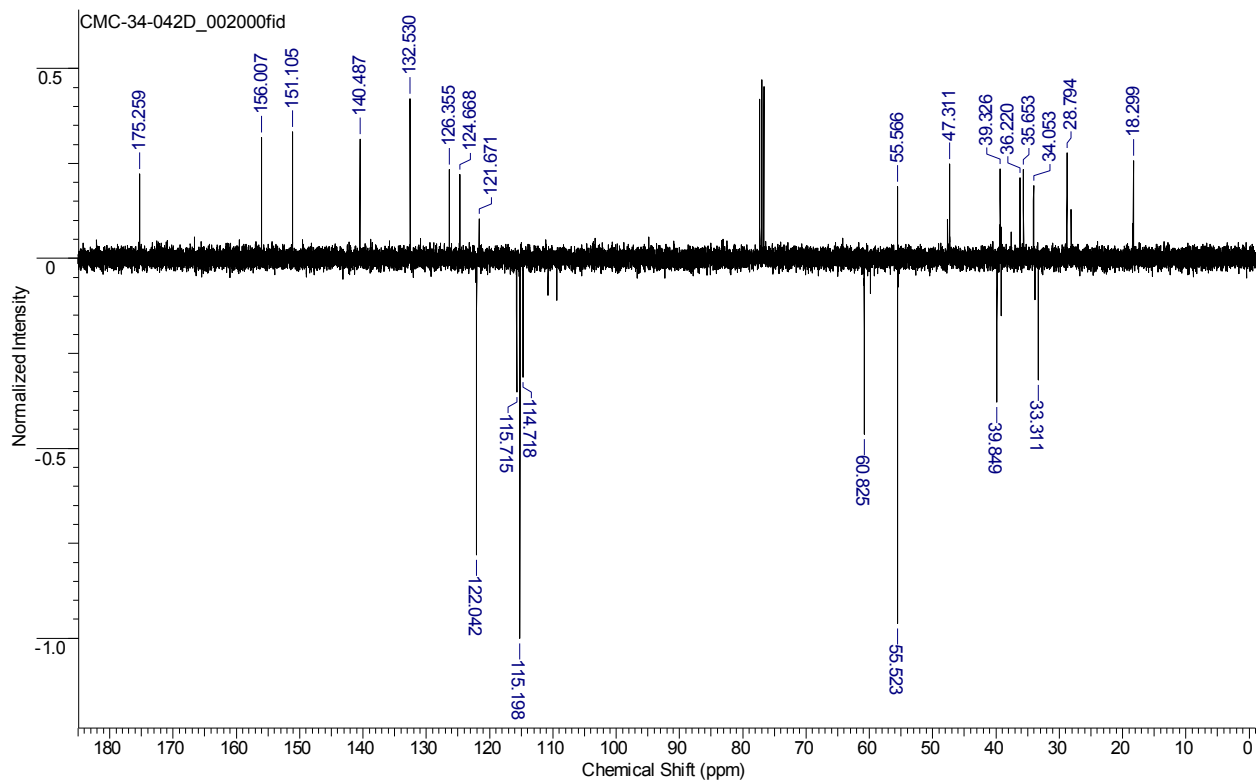

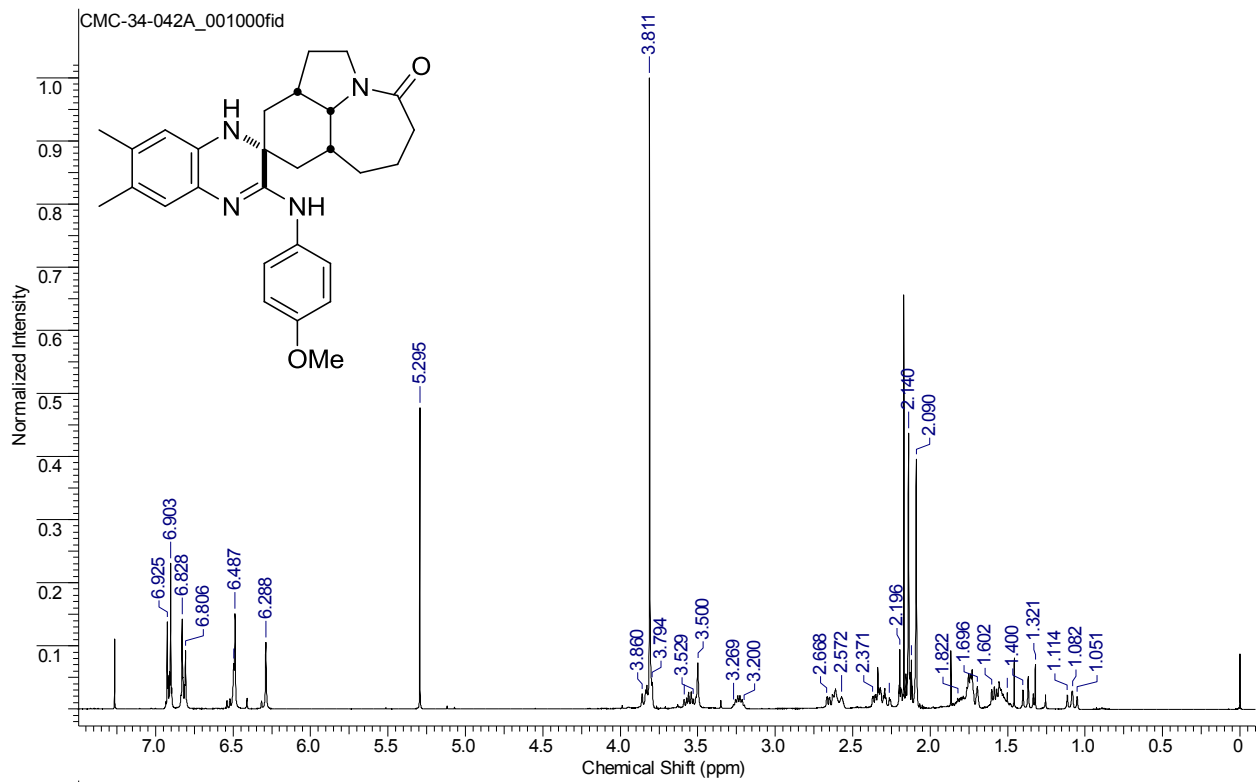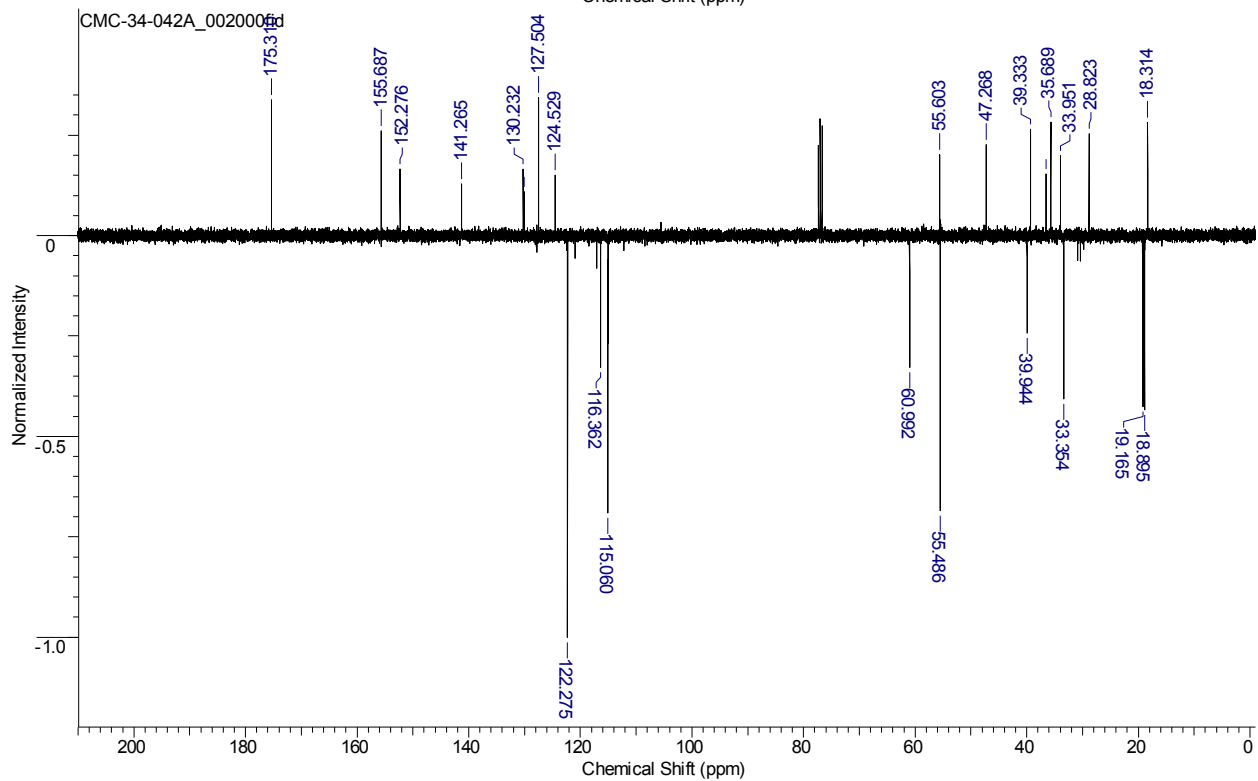

---

<sup>i</sup> Frankowski, K. J.; Neuenswander, B.; Aubé, J. (2008) Explorations of *Stemona* alkaloid-inspired analogues: skeletal modification and functional group diversification. *J. Comb. Chem.* **10**, 721-725.

<sup>ii</sup> Shapiro, D. A.; Renock, S.; Arrington, E.; Chiodo, L. A.; Liu, L. X.; Sibley, D. R.; Roth, B. L.; Mailman, R. (2003) Aripiprazole, a novel atypical antipsychotic drug with a unique and robust pharmacology. *Neuropsychopharmacology* **28**, 1400-1411.

<sup>iii</sup> Roth, B. L.; Baner, K.; Westkaemper, R.; Siebert, D.; Rice, K. C.; Steinberg, S.; Ernsberger, P.; Rothman, R. B. (2002) Salvinorin A: a Potent Naturally Occurring Nonnitrogenous Kappa Opioid Selective Agonist. *Proc. Natl. Acad. Sci. U.S.A.* **99**, 11934-11939.

<sup>iv</sup> Armbruster, B. N., Li, X., Pausch, M. H., Herlitze, S. & Roth, B. L. (2007) Evolving the lock to fit the key to create a family of G protein-coupled receptors potently activated by an inert ligand. *Proc. Natl. Acad. Sci. USA* **104**, 5163-5168.
